# Supplementary material
Source: publisher figshare collection journal article supplement (https://acs.figshare.com/ndownloader/files/4376869)
Supplement: Supplementary file 1 [file 4376869]

data_General
_audit_creation_date                  '2010-07-10'
_audit_creation_method                'by CrystalStructure 3.8'
_audit_update_record                   ?

#==============================================================================

# PROCESSING SUMMARY (IUCr Office Use Only)

_journal_date_recd_electronic     ?
_journal_date_from_coeditor       ?
_journal_date_accepted            ?
_journal_coeditor_code            ?

#==============================================================================

# SUBMISSION DETAILS

_publ_contact_author_name             'Susumu Kitagawa'
_publ_contact_author_address          
;                                      Department of Synthetic Chemistry 
                                       and Biological Chemistry, 
                                       Graduate School of Engineering, 
                                       Kyoto University, 
                                       Katsura, Kyoto 615-8510, Japan 
;
_publ_contact_author_email            'kitagawa@sbchem.kyoto-u.ac.jp'
_publ_contact_author_fax              '+81-75-383-2732'
_publ_contact_author_phone            '+81-75-383-2733'
_publ_contact_letter
;
    ENTER TEXT OF LETTER
;
_publ_requested_journal               'ENTER JOURNAL NAME HERE'
_publ_requested_category              'CHOOSE FI FM FO CI CM CO or AD'
_publ_requested_coeditor_name          ?

#==============================================================================

# TITLE AND AUTHOR LIST

_publ_section_title
;
  Synthesis of TCNQ-based porous coordination polymers with several metal ions  
  and guest dependent properties
;
_publ_section_title_footnote
;
    ENTER FOOTNOTE TO TITLE OF PAPER
;
loop_
_publ_author_name
_publ_author_footnote
_publ_author_address
' Satoru Shimomura '
;
  FIRST AUTHORS FOOTNOTES
;
; Department of Synthetic Chemistry and Biological Chemistry, 
  Graduate School of Engineering, 
  Kyoto University, 
  Katsura, Kyoto 615-8510, Japan
;
_publ_section_synopsis
;
  ENTER SYNOPSIS
;

#==============================================================================

# TEXT

_publ_section_abstract
;
    ENTER ABSTRACT
;
_publ_section_comment
;
    ENTER TEXT
;
_publ_section_references
;
    ENTER OTHER REFERENCES

    Rigaku Americas and Rigaku Corporation. (2007).
    CrystalStructure (Version 3.8). 
    Single Crystal Structure Analysis Software.
    Rigaku Americas, 9009 TX, USA 77381-5209.
    Rigaku, Tokyo 196-8666, Japan.

    Burla, M.C., Camalli, M., Carrozzini, B., Cascarano, G.L., 
    Giacovazzo, C., Polidori, G., Spagna., R. 
    (2003). 
    SIR2002

    Carruthers, J.R., Rollett,J.S., Betteridge, P.W.,
	 Kinna, D., Pearce, L., Larsen, A., and Gabe, E.(1999)
    CRYSTALS Issue 11, Chemical Crystallography Laboratory, Oxford, UK.

    Carruthers, J.R. and Watkin, D.J. (1979), Acta Cryst, A35, 698-699

;
_publ_section_figure_captions
;
    ENTER FIGURE CAPTIONS
;
_publ_section_exptl_prep
;
    ENTER COMPOUND PREPARATION DETAILS
;
_publ_section_exptl_refinement
;
    ENTER SPECIAL DETAILS OF THE REFINEMENT
;

#==============================================================================

data___FeTCNQbpy_c

#==============================================================================

# CHEMICAL DATA

_chemical_formula_sum                  'C30 H12 Fe N6 O8 '
_chemical_formula_moiety               'C30 H12 Fe N6 O8 '
_chemical_formula_weight               640.31
_chemical_melting_point                ?

#==============================================================================

# CRYSTAL DATA
_symmetry_cell_setting                 tetragonal
_symmetry_space_group_name_H-M        'I 4/m c m'
_symmetry_space_group_name_Hall       '-I 4 2c'
_symmetry_Int_Tables_number            140
loop_
_symmetry_equiv_pos_site_id
_symmetry_equiv_pos_as_xyz
1   '+X,+Y,+Z'
2   '-Y,+X,+Z'
3   '-X,-Y,+Z'
4   '+Y,-X,+Z'
5   '-X,+Y,1/2+Z'
6   '+Y,+X,1/2+Z'
7   '+X,-Y,1/2+Z'
8   '-Y,-X,1/2+Z'
9   '-X,-Y,-Z'
10  '+Y,-X,-Z'
11  '+X,+Y,-Z'
12  '-Y,+X,-Z'
13  '+X,-Y,1/2-Z'
14  '-Y,-X,1/2-Z'
15  '-X,+Y,1/2-Z'
16  '+Y,+X,1/2-Z'
17  '1/2+X,1/2+Y,1/2+Z'
18  '1/2-Y,1/2+X,1/2+Z'
19  '1/2-X,1/2-Y,1/2+Z'
20  '1/2+Y,1/2-X,1/2+Z'
21  '1/2-X,1/2+Y,+Z'
22  '1/2+Y,1/2+X,+Z'
23  '1/2+X,1/2-Y,+Z'
24  '1/2-Y,1/2-X,+Z'
25  '1/2-X,1/2-Y,1/2-Z'
26  '1/2+Y,1/2-X,1/2-Z'
27  '1/2+X,1/2+Y,1/2-Z'
28  '1/2-Y,1/2+X,1/2-Z'
29  '1/2+X,1/2-Y,-Z'
30  '1/2-Y,1/2-X,-Z'
31  '1/2-X,1/2+Y,-Z'
32  '1/2+Y,1/2+X,-Z'

#------------------------------------------------------------------------------

_cell_length_a                         12.413(20)
_cell_length_b                         12.413(20)
_cell_length_c                         23.03(4)
_cell_angle_alpha                      90.0000
_cell_angle_beta                       90.0000
_cell_angle_gamma                      90.0000
_cell_volume                           3549(10)
_cell_formula_units_Z                  4
_cell_measurement_reflns_used          3115
_cell_measurement_theta_min            3.1
_cell_measurement_theta_max            27.5
_cell_measurement_temperature          243.1

#------------------------------------------------------------------------------

_exptl_crystal_description            'prism'
_exptl_crystal_colour                 'colorless'
_exptl_crystal_size_max                0.20
_exptl_crystal_size_mid                0.20
_exptl_crystal_size_min                0.20
_exptl_crystal_density_diffrn          1.198
_exptl_crystal_density_meas            ?
_exptl_crystal_density_method         'not measured'
_exptl_crystal_F_000                   1296.00
_exptl_absorpt_coefficient_mu          0.475
_exptl_absorpt_correction_type         multi-scan
_exptl_absorpt_process_details         
'Jacobson, R. (1998) Private communication'
_exptl_absorpt_correction_T_min        0.191
_exptl_absorpt_correction_T_max        0.909

#==============================================================================

# EXPERIMENTAL DATA

_diffrn_radiation_type                'Mo K\a'
_diffrn_radiation_wavelength           0.71070
_diffrn_measurement_device_type       'Rigaku Mercury'
_diffrn_measurement_method             \w
_diffrn_detector_area_resol_mean       7.31
_diffrn_reflns_number                  11663
_diffrn_reflns_av_R_equivalents        0.150
_diffrn_reflns_theta_max               27.48
_diffrn_measured_fraction_theta_max    0.995
_diffrn_reflns_theta_full              27.48
_diffrn_measured_fraction_theta_full   0.995
_diffrn_reflns_limit_h_min             -16
_diffrn_reflns_limit_h_max             16
_diffrn_reflns_limit_k_min             -14
_diffrn_reflns_limit_k_max             14
_diffrn_reflns_limit_l_min             -27
_diffrn_reflns_limit_l_max             29
_diffrn_ambient_temperature            243.1

#==============================================================================

# REFINEMENT DATA

_refine_special_details
;
    Refinement was performed using reflections with F^2^ > 2.0 sigma(F^2^).
    The weighted R-factor(wR), goodness of fit (S) and R-factor (gt) are 
    based on F, with F set to zero for negative F. The threshold expression of
    F^2^ > 2.0 sigma(F^2^) is used only for calculating R-factor (gt).
;
_reflns_number_total                   1109
_reflns_number_gt                      4105
_reflns_threshold_expression           F^2^>2.0\s(F^2^)
_refine_ls_structure_factor_coef       F
_refine_ls_R_factor_gt                 0.0873
_refine_ls_wR_factor_ref               0.1036
_refine_ls_hydrogen_treatment          refall
_refine_ls_number_reflns               4165
_refine_ls_number_parameters           69
_refine_ls_goodness_of_fit_ref         1.041
_refine_ls_weighting_scheme            calc
_refine_ls_weighting_details
;
    Chebychev polynomial with 3 parameters (Carruthers & Watkin, 1979)
    31.0221    -5.6655    21.5872
;
_refine_ls_shift/su_max                0.0000
_refine_diff_density_max               2.42
_refine_diff_density_min               -3.30
_refine_ls_extinction_method           none
_refine_ls_extinction_coef             ?

loop_
_atom_type_symbol
_atom_type_description
_atom_type_scat_dispersion_real
_atom_type_scat_dispersion_imag
_atom_type_scat_source
  'C' 'C'  0.003 0.002 
;
International Tables for Crystallography
(1992, Vol. C, Tables 4.2.6.8 and 6.1.1.4)
;
  'H' 'H'  0.000 0.000 
;
International Tables for Crystallography
(1992, Vol. C, Table 6.1.1.4)
;
  'N' 'N'  0.006 0.003 
;
International Tables for Crystallography
(1992, Vol. C, Tables 4.2.6.8 and 6.1.1.4)
;
  'O' 'O'  0.011 0.006 
;
International Tables for Crystallography
(1992, Vol. C, Tables 4.2.6.8 and 6.1.1.4)
;
  'Fe' 'Fe'  0.346 0.844 
;
International Tables for Crystallography
(1992, Vol. C, Tables 4.2.6.8 and 6.1.1.4)
;

#==============================================================================

# ATOMIC COORDINATES AND THERMAL PARAMETERS

loop_
_atom_site_label
_atom_site_type_symbol
_atom_site_fract_x
_atom_site_fract_y
_atom_site_fract_z
_atom_site_U_iso_or_equiv
_atom_site_adp_type
_atom_site_occupancy
_atom_site_symmetry_multiplicity
_atom_site_calc_flag
_atom_site_refinement_flags
_atom_site_disorder_assembly
_atom_site_disorder_group
 Fe(1) Fe 1.0000 0.0000 0.5000 0.0366(2) Uani 1.00 8 d S . .
 O(1) O 0.6884(10) 0.1883(10) 0.1768(10) 0.516(10) Uiso 1.00 2 d S . .
 O(2) O 0.3247(18) 0.1753(18) 0.1988(13) 0.74(2) Uiso 1.00 2 d S . .
 N(1) N 0.86004(19) 0.10029(19) 0.5000 0.0413(9) Uani 1.00 2 d S . .
 N(2) N 1.0000 0.0000 0.40394(14) 0.0435(7) Uani 1.00 4 d S . .
 C(1) C 0.7733(2) 0.1353(2) 0.5000 0.0360(9) Uani 1.00 2 d S . .
 C(2) C 0.6640(2) 0.1640(2) 0.5000 0.0449(12) Uani 1.00 4 d S . .
 C(3) C 0.5807(2) 0.0807(2) 0.5000 0.0517(12) Uani 1.00 4 d S . .
 C(4) C 0.6052(2) -0.0277(2) 0.500000(10) 0.0650(13) Uani 1.00 2 d S . .
 C(5) C 0.9150(4) -0.0271(6) 0.3737(2) 0.078(2) Uani 0.50 1 d P . .
 C(6) C 0.9127(4) -0.0277(6) 0.3140(2) 0.085(2) Uani 0.50 1 d P . .
 C(7) C 1.0000 0.0000 0.28220(19) 0.0516(9) Uani 1.00 4 d S . .
 C(8) C 0.648(3) 0.148(3) 0.1259(18) 1.10(5) Uiso 1.00 2 d S . .
 C(9) C 0.3928(18) 0.1072(18) 0.1747(11) 0.486(14) Uiso 1.00 2 d S . .
 H(1) H 0.6787 -0.0492 0.5000 0.078 Uiso 1.00 2 c R . .
 H(2) H 0.8513 -0.0471 0.3939 0.093 Uiso 0.50 1 c R . .
 H(3) H 0.8483 -0.0484 0.2947 0.102 Uiso 0.50 1 c R . .


loop_
_atom_site_aniso_label
_atom_site_aniso_U_11
_atom_site_aniso_U_22
_atom_site_aniso_U_33
_atom_site_aniso_U_12
_atom_site_aniso_U_13
_atom_site_aniso_U_23
 Fe(1) 0.0302(3) 0.0302(3) 0.0494(6) 0.0000 0.0000 0.0000
 N(1) 0.0256(16) 0.0324(16) 0.066(2) 0.0029(15) 0.0000 0.0000
 N(2) 0.0412(12) 0.0412(12) 0.048(2) 0.0000 0.0000 0.0000
 C(1) 0.034(2) 0.0195(15) 0.055(2) -0.0007(14) 0.0000 0.0000
 C(2) 0.0288(15) 0.0288(15) 0.077(4) 0.0056(19) 0.0000 0.0000
 C(3) 0.0398(18) 0.0398(18) 0.076(3) -0.005(2) 0.0000 0.0000
 C(4) 0.0246(18) 0.055(2) 0.116(3) 0.0164(15) 0.0000 0.0000
 C(5) 0.047(3) 0.123(5) 0.064(4) -0.031(3) 0.001(2) -0.005(3)
 C(6) 0.064(3) 0.138(5) 0.052(3) -0.040(3) -0.016(2) 0.006(3)
 C(7) 0.0518(16) 0.0518(16) 0.051(2) 0.0000 0.0000 0.0000

#==============================================================================

_computing_data_collection            'CrystalClear'
_computing_cell_refinement            'CrystalClear'
_computing_data_reduction             'CrystalStructure'
_computing_structure_solution         'SIR2002'
_computing_structure_refinement       'CRYSTALS'
_computing_publication_material       'CrystalStructure 3.8'
_computing_molecular_graphics          ?

#==============================================================================

# MOLECULAR GEOMETRY

_geom_special_details
;
    ENTER SPECIAL DETAILS OF THE MOLECULAR GEOMETRY
;

loop_
_geom_bond_atom_site_label_1
_geom_bond_atom_site_label_2
_geom_bond_distance
_geom_bond_publ_flag
_geom_bond_site_symmetry_1
_geom_bond_site_symmetry_2
Fe(1) N(1) 2.137(2) yes . .
Fe(1) N(1) 2.137(2) yes . 2_645
Fe(1) N(1) 2.137(2) yes . 3_755
Fe(1) N(1) 2.137(2) yes . 4_665
Fe(1) N(2) 2.212(3) yes . .
Fe(1) N(2) 2.212(3) yes . 9_756
O(1) C(8) 1.37(4) yes . .
O(2) C(9) 1.32(3) yes . .
N(1) C(1) 1.161(4) yes . .
N(2) C(5) 1.309(6) yes . .
N(2) C(5) 1.309(7) yes . 2_645
N(2) C(5) 1.309(6) yes . 3_755
N(2) C(5) 1.309(7) yes . 4_665
C(1) C(2) 1.403(4) yes . .
C(2) C(3) 1.462(4) yes . .
C(3) C(4) 1.380(4) yes . .
C(3) C(4) 1.380(4) yes . 22_545
C(4) C(4) 1.362(4) yes . 24_555
C(5) C(5) 1.567(8) yes . 2_645
C(5) C(5) 1.567(10) yes . 4_665
C(5) C(6) 1.375(7) yes . .
C(6) C(6) 1.608(9) yes . 2_645
C(6) C(6) 1.608(10) yes . 4_665
C(6) C(7) 1.353(6) yes . .
C(7) C(7) 1.483(6) yes . 13_555
C(4) H(1) 0.950 no . .
C(5) H(2) 0.950 no . .
C(6) H(3) 0.950 no . .

loop_
_geom_angle_atom_site_label_1
_geom_angle_atom_site_label_2
_geom_angle_atom_site_label_3
_geom_angle
_geom_angle_publ_flag
_geom_angle_site_symmetry_1
_geom_angle_site_symmetry_2
_geom_angle_site_symmetry_3
N(1) Fe(1) N(1) 90.00(8) yes . . 2_645
N(1) Fe(1) N(1) 180.00(8) yes . . 3_755
N(1) Fe(1) N(1) 90.00(8) yes . . 4_665
N(1) Fe(1) N(2) 90.0000 yes . . .
N(1) Fe(1) N(2) 90.0000 yes . . 9_756
N(1) Fe(1) N(1) 90.00(8) yes 2_645 . 3_755
N(1) Fe(1) N(1) 180.00(8) yes 2_645 . 4_665
N(1) Fe(1) N(2) 90.0000 yes 2_645 . .
N(1) Fe(1) N(2) 90.0000 yes 2_645 . 9_756
N(1) Fe(1) N(1) 90.00(8) yes 3_755 . 4_665
N(1) Fe(1) N(2) 90.0000 yes 3_755 . .
N(1) Fe(1) N(2) 90.0000 yes 3_755 . 9_756
N(1) Fe(1) N(2) 90.0000 yes 4_665 . .
N(1) Fe(1) N(2) 90.0000 yes 4_665 . 9_756
N(2) Fe(1) N(2) 180.0000 yes . . 9_756
Fe(1) N(1) C(1) 166.3(2) yes . . .
Fe(1) N(2) C(5) 122.2(2) yes . . .
Fe(1) N(2) C(5) 122.2(2) yes . . 2_645
Fe(1) N(2) C(5) 122.2(2) yes . . 3_755
Fe(1) N(2) C(5) 122.2(2) yes . . 4_665
C(5) N(2) C(5) 73.5(4) yes . . 2_645
C(5) N(2) C(5) 115.7(4) yes . . 3_755
C(5) N(2) C(5) 73.5(4) yes . . 4_665
C(5) N(2) C(5) 73.5(4) yes 2_645 . 3_755
C(5) N(2) C(5) 115.7(4) yes 2_645 . 4_665
C(5) N(2) C(5) 73.5(4) yes 3_755 . 4_665
N(1) C(1) C(2) 172.8(3) yes . . .
C(1) C(2) C(1) 119.5(2) yes . . 22_545
C(1) C(2) C(3) 120.3(2) yes . . .
C(1) C(2) C(3) 120.3(2) yes 22_545 . .
C(2) C(3) C(4) 122.3(3) yes . . .
C(2) C(3) C(4) 122.3(2) yes . . 22_545
C(4) C(3) C(4) 115.5(3) yes . . 22_545
C(3) C(4) C(4) 122.3(3) yes . . 24_555
N(2) C(5) C(5) 53.2(3) yes . . 2_645
N(2) C(5) C(5) 53.2(3) yes . . 4_665
N(2) C(5) C(6) 123.4(5) yes . . .
C(5) C(5) C(5) 90.0(4) yes 2_645 . 4_665
C(5) C(5) C(6) 90.9(4) yes 2_645 . .
C(5) C(5) C(6) 90.8(5) yes 4_665 . .
C(5) C(6) C(6) 89.1(4) yes . . 2_645
C(5) C(6) C(6) 89.2(5) yes . . 4_665
C(5) C(6) C(7) 121.6(5) yes . . .
C(6) C(6) C(6) 90.0(4) yes 2_645 . 4_665
C(6) C(6) C(7) 53.5(3) yes 2_645 . .
C(6) C(6) C(7) 53.5(3) yes 4_665 . .
C(6) C(7) C(6) 72.9(4) yes . . 2_645
C(6) C(7) C(6) 114.4(4) yes . . 3_755
C(6) C(7) C(6) 72.9(4) yes . . 4_665
C(6) C(7) C(7) 122.8(2) yes . . 13_555
C(6) C(7) C(6) 72.9(4) yes 2_645 . 3_755
C(6) C(7) C(6) 114.4(4) yes 2_645 . 4_665
C(6) C(7) C(7) 122.8(3) yes 2_645 . 13_555
C(6) C(7) C(6) 72.9(4) yes 3_755 . 4_665
C(6) C(7) C(7) 122.8(2) yes 3_755 . 13_555
C(6) C(7) C(7) 122.8(3) yes 4_665 . 13_555
C(3) C(4) H(1) 119.1 no . . .
C(4) C(4) H(1) 118.6 no 24_555 . .
N(2) C(5) H(2) 118.5 no . . .
C(5) C(5) H(2) 128.2 no 2_645 . .
C(5) C(5) H(2) 127.9 no 4_665 . .
C(6) C(5) H(2) 118.2 no . . .
C(5) C(6) H(3) 119.2 no . . .
C(6) C(6) H(3) 128.5 no 2_645 . .
C(6) C(6) H(3) 128.8 no 4_665 . .
C(7) C(6) H(3) 119.3 no . . .

loop_
_geom_torsion_atom_site_label_1
_geom_torsion_atom_site_label_2
_geom_torsion_atom_site_label_3
_geom_torsion_atom_site_label_4
_geom_torsion
_geom_torsion_publ_flag
_geom_torsion_site_symmetry_1
_geom_torsion_site_symmetry_2
_geom_torsion_site_symmetry_3
_geom_torsion_site_symmetry_4
N(1) Fe(1) N(2) C(5) -53.3(3) ? . . . .
N(1) Fe(1) N(2) C(5) -143.3(3) ? . . . 2_645
N(1) Fe(1) N(2) C(5) 126.7(3) ? . . . 3_755
N(1) Fe(1) N(2) C(5) 36.7(3) ? . . . 4_665
N(2) Fe(1) N(1) C(1) 90.0 ? . . . .
N(1) Fe(1) N(2) C(5) -126.7(3) ? . . 9_756 9_756
N(2) Fe(1) N(1) C(1) -90.0 ? 9_756 . . .
N(1) Fe(1) N(2) C(5) 36.7(3) ? 2_645 . . .
N(1) Fe(1) N(2) C(5) -53.3(3) ? 2_645 . . 2_645
N(1) Fe(1) N(2) C(5) -143.3(3) ? 2_645 . . 3_755
N(1) Fe(1) N(2) C(5) 126.7(3) ? 2_645 . . 4_665
N(2) Fe(1) N(1) C(1) 90.0 ? . . 2_645 2_645
N(1) Fe(1) N(2) C(5) 143.3(3) ? 2_645 . 9_756 9_756
N(2) Fe(1) N(1) C(1) -90.0 ? 9_756 . 2_645 2_645
N(1) Fe(1) N(2) C(5) 126.7(3) ? 3_755 . . .
N(1) Fe(1) N(2) C(5) 36.7(3) ? 3_755 . . 2_645
N(1) Fe(1) N(2) C(5) -53.3(3) ? 3_755 . . 3_755
N(1) Fe(1) N(2) C(5) -143.3(3) ? 3_755 . . 4_665
N(2) Fe(1) N(1) C(1) 90.0 ? . . 3_755 3_755
N(1) Fe(1) N(2) C(5) 53.3(3) ? 3_755 . 9_756 9_756
N(2) Fe(1) N(1) C(1) -90.0 ? 9_756 . 3_755 3_755
N(1) Fe(1) N(2) C(5) -143.3(3) ? 4_665 . . .
N(1) Fe(1) N(2) C(5) 126.7(3) ? 4_665 . . 2_645
N(1) Fe(1) N(2) C(5) 36.7(3) ? 4_665 . . 3_755
N(1) Fe(1) N(2) C(5) -53.3(3) ? 4_665 . . 4_665
N(2) Fe(1) N(1) C(1) 90.0 ? . . 4_665 4_665
N(1) Fe(1) N(2) C(5) -36.7(3) ? 4_665 . 9_756 9_756
N(2) Fe(1) N(1) C(1) -90.0 ? 9_756 . 4_665 4_665
Fe(1) N(2) C(5) C(6) 180.0(4) ? . . . .
Fe(1) N(2) C(5) C(5) -118.0(3) ? . . . 2_645
Fe(1) N(2) C(5) C(5) 118.0(3) ? . . . 4_665
Fe(1) N(2) C(5) C(6) 180.0(3) ? . . 2_645 2_645
Fe(1) N(2) C(5) C(5) 118.0(3) ? . . 2_645 .
Fe(1) N(2) C(5) C(6) 180.0(4) ? . . 3_755 3_755
Fe(1) N(2) C(5) C(5) 118.0(3) ? . . 3_755 2_645
Fe(1) N(2) C(5) C(5) -118.0(3) ? . . 3_755 4_665
Fe(1) N(2) C(5) C(6) 180.0(3) ? . . 4_665 4_665
Fe(1) N(2) C(5) C(5) -118.0(3) ? . . 4_665 .
C(5) N(2) C(5) C(6) 61.9(6) ? . . 2_645 2_645
C(5) N(2) C(5) C(6) -62.0(7) ? 2_645 . . .
C(5) N(2) C(5) C(5) -123.9(4) ? 2_645 . . 4_665
C(5) N(2) C(5) C(6) -0.0(8) ? . . 3_755 3_755
C(5) N(2) C(5) C(5) -62.0(4) ? . . 3_755 2_645
C(5) N(2) C(5) C(5) 62.0(5) ? . . 3_755 4_665
C(5) N(2) C(5) C(6) -0.0(8) ? 3_755 . . .
C(5) N(2) C(5) C(5) 62.0(5) ? 3_755 . . 2_645
C(5) N(2) C(5) C(5) -62.0(4) ? 3_755 . . 4_665
C(5) N(2) C(5) C(6) -62.0(6) ? . . 4_665 4_665
C(5) N(2) C(5) C(6) 61.9(7) ? 4_665 . . .
C(5) N(2) C(5) C(5) 123.9(4) ? 4_665 . . 2_645
C(5) N(2) C(5) C(6) 61.9(7) ? 2_645 . 3_755 3_755
C(5) N(2) C(5) C(5) 123.9(4) ? 2_645 . 3_755 4_665
C(5) N(2) C(5) C(6) -62.0(6) ? 3_755 . 2_645 2_645
C(5) N(2) C(5) C(5) -123.9(4) ? 3_755 . 2_645 .
C(5) N(2) C(5) C(6) -0.0(6) ? 2_645 . 4_665 4_665
C(5) N(2) C(5) C(5) 62.0(4) ? 2_645 . 4_665 .
C(5) N(2) C(5) C(6) -0.0(7) ? 4_665 . 2_645 2_645
C(5) N(2) C(5) C(5) -62.0(4) ? 4_665 . 2_645 .
C(5) N(2) C(5) C(6) 61.9(6) ? 3_755 . 4_665 4_665
C(5) N(2) C(5) C(5) 123.9(4) ? 3_755 . 4_665 .
C(5) N(2) C(5) C(6) -62.0(7) ? 4_665 . 3_755 3_755
C(5) N(2) C(5) C(5) -123.9(4) ? 4_665 . 3_755 2_645
N(2) C(5) C(5) C(6) -132.5(5) ? . . 2_645 2_645
N(2) C(5) C(5) C(6) 132.5(5) ? . . 4_665 4_665
N(2) C(5) C(6) C(7) 0.1(10) ? . . . .
N(2) C(5) C(6) C(6) 45.1(7) ? . . . 2_645
N(2) C(5) C(6) C(6) -45.0(7) ? . . . 4_665
C(5) C(5) C(5) N(2) -41.7(3) ? 2_645 . 4_665 .
C(5) C(5) C(5) C(6) 90.8(4) ? 2_645 . 4_665 4_665
C(5) C(5) C(5) N(2) 41.7(3) ? 4_665 . 2_645 .
C(5) C(5) C(5) C(6) -90.9(5) ? 4_665 . 2_645 2_645
C(5) C(5) C(6) C(7) -45.0(7) ? 2_645 . . .
C(5) C(5) C(6) C(6) 0.0(4) ? 2_645 . . 2_645
C(5) C(5) C(6) C(6) -90.0(4) ? 2_645 . . 4_665
C(6) C(5) C(5) N(2) 132.5(5) ? . . 2_645 .
C(6) C(5) C(5) C(6) -0.0(5) ? . . 2_645 2_645
C(5) C(5) C(6) C(7) 45.1(7) ? 4_665 . . .
C(5) C(5) C(6) C(6) 90.0(4) ? 4_665 . . 2_645
C(5) C(5) C(6) C(6) 0.0(3) ? 4_665 . . 4_665
C(6) C(5) C(5) N(2) -132.5(5) ? . . 4_665 .
C(6) C(5) C(5) C(6) -0.0(4) ? . . 4_665 4_665
C(5) C(6) C(6) C(5) -0.0(5) ? . . 2_645 2_645
C(5) C(6) C(6) C(7) -131.5(5) ? . . 2_645 .
C(5) C(6) C(6) C(5) -0.0(4) ? . . 4_665 4_665
C(5) C(6) C(6) C(7) 131.5(5) ? . . 4_665 .
C(5) C(6) C(7) C(6) 61.5(7) ? . . . 2_645
C(5) C(6) C(7) C(6) -0.0(8) ? . . . 3_755
C(5) C(6) C(7) C(6) -61.6(7) ? . . . 4_665
C(5) C(6) C(7) C(7) 180.0(4) ? . . . 13_555
C(6) C(6) C(6) C(5) -89.2(4) ? 2_645 . 4_665 4_665
C(6) C(6) C(6) C(7) 42.3(3) ? 2_645 . 4_665 .
C(6) C(6) C(6) C(5) 89.1(5) ? 4_665 . 2_645 2_645
C(6) C(6) C(6) C(7) -42.3(3) ? 4_665 . 2_645 .
C(6) C(6) C(7) C(6) -61.6(5) ? 2_645 . . 3_755
C(6) C(6) C(7) C(6) -123.1(4) ? 2_645 . . 4_665
C(6) C(6) C(7) C(7) 118.4(3) ? 2_645 . . 13_555
C(7) C(6) C(6) C(5) 131.5(6) ? . . 2_645 2_645
C(6) C(6) C(7) C(6) 123.1(4) ? 4_665 . . 2_645
C(6) C(6) C(7) C(6) 61.6(5) ? 4_665 . . 3_755
C(6) C(6) C(7) C(7) -118.4(3) ? 4_665 . . 13_555
C(7) C(6) C(6) C(5) -131.5(5) ? . . 4_665 4_665
C(6) C(7) C(7) C(6) 35.3(5) ? . . 13_555 13_555
C(6) C(7) C(7) C(6) 125.3(4) ? 2_645 . 13_555 13_555
C(6) C(7) C(7) C(6) -144.7(5) ? 3_755 . 13_555 13_555
C(6) C(7) C(7) C(6) -54.7(4) ? 4_665 . 13_555 13_555

loop_
_geom_contact_atom_site_label_1
_geom_contact_atom_site_label_2
_geom_contact_distance
_geom_contact_publ_flag
_geom_contact_site_symmetry_1
_geom_contact_site_symmetry_2
Fe(1) C(5) 3.113(5) ? . 10_666
Fe(1) C(5) 3.113(5) ? . 11_556
Fe(1) C(5) 3.113(5) ? . 12_646
O(1) O(2) 2.45(2) ? . 2_655
O(1) O(2) 2.87(3) ? . 15_655
O(1) C(6) 3.431(15) ? . 13_555
O(1) C(6) 3.431(15) ? . 28_545
O(1) C(9) 3.59(2) ? . 2_655
O(2) O(1) 2.45(2) ? . 4_565
O(2) O(1) 2.87(3) ? . 15_655
O(2) O(2) 3.53(3) ? . 16_555
O(2) C(8) 3.52(5) ? . 4_565
N(1) C(5) 3.235(5) ? . 10_666
N(1) C(5) 3.381(6) ? . 11_556
C(3) C(3) 2.835(4) ? . 3_655
C(3) C(4) 2.401(4) ? . 3_655
C(4) C(3) 2.401(4) ? . 3_655
C(4) C(4) 2.702(4) ? . 3_655
C(4) C(8) 3.31(4) ? . 7_555
C(4) C(8) 3.31(4) ? . 13_555
C(6) O(1) 3.431(15) ? . 13_555
C(6) C(6) 3.574(8) ? . 14_665
C(6) C(6) 3.128(8) ? . 16_645
C(7) C(6) 2.491(7) ? . 14_665
C(7) C(6) 2.491(7) ? . 15_755
C(7) C(6) 2.491(7) ? . 16_645
C(8) O(2) 3.52(4) ? . 2_655
C(8) C(4) 3.31(4) ? . 7_554
C(8) C(4) 3.31(4) ? . 18_544
C(8) C(9) 3.40(4) ? . .
C(8) C(9) 3.40(4) ? . 3_655
C(9) O(1) 3.59(2) ? . 4_565
C(9) C(8) 3.40(4) ? . .
C(9) C(8) 3.40(4) ? . 3_655
Fe(1) H(2) 3.117 ? . 10_666
Fe(1) H(2) 3.117 ? . 11_556
Fe(1) H(2) 3.117 ? . 12_646
O(1) H(2) 3.134 ? . 13_555
O(1) H(2) 3.134 ? . 28_545
O(1) H(3) 2.719 ? . 13_555
O(1) H(3) 2.719 ? . 28_545
O(2) H(3) 3.460 ? . 3_655
O(2) H(3) 3.445 ? . 14_565
O(2) H(3) 3.514 ? . 15_655
O(2) H(3) 3.460 ? . 22_545
O(2) H(3) 3.445 ? . 27_455
O(2) H(3) 3.514 ? . 28_545
N(1) H(2) 2.768 ? . 10_666
N(1) H(2) 3.054 ? . 11_556
C(1) H(2) 3.312 ? . 10_666
C(1) H(2) 3.468 ? . 11_556
C(3) H(1) 3.244 ? . 3_655
C(6) H(3) 2.978 ? . 16_645
C(7) H(3) 2.654 ? . 14_665
C(7) H(3) 2.654 ? . 15_755
C(7) H(3) 2.654 ? . 16_645
C(8) H(1) 3.171 ? . 7_554
C(8) H(1) 3.171 ? . 18_544
C(8) H(2) 2.853 ? . 13_555
C(8) H(2) 2.853 ? . 28_545
C(8) H(3) 3.324 ? . 13_555
C(8) H(3) 3.324 ? . 28_545
H(1) C(3) 3.244 ? . 3_655
H(1) C(8) 3.171 ? . 7_555
H(1) C(8) 3.171 ? . 13_555
H(1) H(2) 3.250 ? . 11_556
H(2) O(1) 3.134 ? . 13_555
H(2) C(8) 2.853 ? . 13_555
H(3) O(1) 2.719 ? . 13_555
H(3) O(2) 3.460 ? . 3_655
H(3) O(2) 3.445 ? . 14_655
H(3) O(2) 3.514 ? . 15_655
H(3) C(6) 2.978 ? . 16_645
H(3) C(8) 3.324 ? . 13_555
H(3) H(3) 2.743 ? . 16_645


#==============================================================================

#===END

data_General
_audit_creation_date                  '2010-07-10'
_audit_creation_method                'by CrystalStructure 3.8'
_audit_update_record                   ?

#==============================================================================

# PROCESSING SUMMARY (IUCr Office Use Only)

_journal_date_recd_electronic     ?
_journal_date_from_coeditor       ?
_journal_date_accepted            ?
_journal_coeditor_code            ?

#==============================================================================

# SUBMISSION DETAILS

_publ_contact_author_name             'Susumu Kitagawa'
_publ_contact_author_address          
;                                      Department of Synthetic Chemistry 
                                       and Biological Chemistry, 
                                       Graduate School of Engineering, 
                                       Kyoto University, 
                                       Katsura, Kyoto 615-8510, Japan 
;
_publ_contact_author_email            'kitagawa@sbchem.kyoto-u.ac.jp'
_publ_contact_author_fax              '+81-75-383-2732'
_publ_contact_author_phone            '+81-75-383-2733'
_publ_contact_letter
;
    ENTER TEXT OF LETTER
;
_publ_requested_journal               'ENTER JOURNAL NAME HERE'
_publ_requested_category              'CHOOSE FI FM FO CI CM CO or AD'
_publ_requested_coeditor_name          ?

#==============================================================================

# TITLE AND AUTHOR LIST

_publ_section_title
;
  Synthesis of TCNQ-based porous coordination polymers with several metal ions  
  and guest dependent properties
;
_publ_section_title_footnote
;
    ENTER FOOTNOTE TO TITLE OF PAPER
;
loop_
_publ_author_name
_publ_author_footnote
_publ_author_address
' Satoru Shimomura '
;
  FIRST AUTHORS FOOTNOTES
;
; Department of Synthetic Chemistry and Biological Chemistry, 
  Graduate School of Engineering, 
  Kyoto University, 
  Katsura, Kyoto 615-8510, Japan
;
_publ_section_synopsis
;
  ENTER SYNOPSIS
;

#==============================================================================

# TEXT

_publ_section_abstract
;
    ENTER ABSTRACT
;
_publ_section_comment
;
    ENTER TEXT
;
_publ_section_references
;
    ENTER OTHER REFERENCES

    Rigaku Americas and Rigaku Corporation. (2007).
    CrystalStructure (Version 3.8). 
    Single Crystal Structure Analysis Software.
    Rigaku Americas, 9009 TX, USA 77381-5209.
    Rigaku, Tokyo 196-8666, Japan.

    Burla, M.C., Camalli, M., Carrozzini, B., Cascarano, G.L., 
    Giacovazzo, C., Polidori, G., Spagna., R. 
    (2003). 
    SIR2002

    Carruthers, J.R., Rollett,J.S., Betteridge, P.W.,
	 Kinna, D., Pearce, L., Larsen, A., and Gabe, E.(1999)
    CRYSTALS Issue 11, Chemical Crystallography Laboratory, Oxford, UK.

    Carruthers, J.R. and Watkin, D.J. (1979), Acta Cryst, A35, 698-699

;
_publ_section_figure_captions
;
    ENTER FIGURE CAPTIONS
;
_publ_section_exptl_prep
;
    ENTER COMPOUND PREPARATION DETAILS
;
_publ_section_exptl_refinement
;
    ENTER SPECIAL DETAILS OF THE REFINEMENT
;

#==============================================================================

data___FeTb_as_173K_a

#==============================================================================

# CHEMICAL DATA

_chemical_formula_sum                  'C29 H33 Fe N6 O7 '
_chemical_formula_moiety               'C29 H33 Fe N6 O7 '
_chemical_formula_weight               633.46
_chemical_melting_point                ?
_chemical_absolute_configuration       'CHOOSE rm ad rmad syn or unk'

#==============================================================================

# CRYSTAL DATA
_symmetry_cell_setting                 tetragonal
_symmetry_space_group_name_H-M        'P -4 21 c'
_symmetry_space_group_name_Hall       'P -4 2n'
_symmetry_Int_Tables_number            114
loop_
_symmetry_equiv_pos_site_id
_symmetry_equiv_pos_as_xyz
1   '+X,+Y,+Z'
2   '+Y,-X,-Z'
3   '-X,-Y,+Z'
4   '-Y,+X,-Z'
5   '1/2-X,1/2+Y,1/2-Z'
6   '1/2-Y,1/2-X,1/2+Z'
7   '1/2+X,1/2-Y,1/2-Z'
8   '1/2+Y,1/2+X,1/2+Z'

#------------------------------------------------------------------------------

_cell_length_a                         17.2926(4)
_cell_length_b                         17.2926(4)
_cell_length_c                         22.8962(8)
_cell_angle_alpha                      90.0000
_cell_angle_beta                       90.0000
_cell_angle_gamma                      90.0000
_cell_volume                           6846.7(3)
_cell_formula_units_Z                  8
_cell_measurement_reflns_used          13843
_cell_measurement_theta_min            3.2
_cell_measurement_theta_max            27.5
_cell_measurement_temperature          133.1

#------------------------------------------------------------------------------

_exptl_crystal_description            'prism'
_exptl_crystal_colour                 'colorless'
_exptl_crystal_size_max                0.20
_exptl_crystal_size_mid                0.20
_exptl_crystal_size_min                0.20
_exptl_crystal_density_diffrn          1.229
_exptl_crystal_density_meas            ?
_exptl_crystal_density_method         'not measured'
_exptl_crystal_F_000                   2648.00
_exptl_absorpt_coefficient_mu          0.489
_exptl_absorpt_correction_type         none

#==============================================================================

# EXPERIMENTAL DATA

_diffrn_radiation_type                'Mo K\a'
_diffrn_radiation_wavelength           0.71075
_diffrn_measurement_device_type       'Rigaku Saturn'
_diffrn_measurement_method             \w
_diffrn_detector_area_resol_mean       7.31
_diffrn_reflns_number                  45593
_diffrn_reflns_av_R_equivalents        0.048
_diffrn_reflns_theta_max               27.48
_diffrn_measured_fraction_theta_max    0.994
_diffrn_reflns_theta_full              27.48
_diffrn_measured_fraction_theta_full   0.994
_diffrn_reflns_limit_h_min             -22
_diffrn_reflns_limit_h_max             22
_diffrn_reflns_limit_k_min             -22
_diffrn_reflns_limit_k_max             16
_diffrn_reflns_limit_l_min             -29
_diffrn_reflns_limit_l_max             28
_diffrn_ambient_temperature            133.1

#==============================================================================

# REFINEMENT DATA

_refine_special_details
;
    Refinement was performed using reflections with F^2^ > 2.0 sigma(F^2^).
    The weighted     R-factor (wR) and goodness of fit (S) are based on F^2^.
    R-factor (gt) are based on F. The threshold expression of
    F^2^ > 2.0 sigma(F^2^) is used only for calculating R-factor (gt).
;
_reflns_number_total                   7814
_reflns_number_gt                      32886
_reflns_threshold_expression           F^2^>2.0\s(F^2^)
_refine_ls_structure_factor_coef       Fsqd
_refine_ls_R_factor_gt                 0.0749
_refine_ls_wR_factor_ref               0.1039
_refine_ls_hydrogen_treatment          refall
_refine_ls_number_reflns               33313
_refine_ls_number_parameters           426
_refine_ls_goodness_of_fit_ref         1.139
_refine_ls_weighting_scheme            calc
_refine_ls_weighting_details
;
    Chebychev polynomial with 3 parameters (Carruthers & Watkin, 1979)
    18651.1000    25941.1000    7838.4300
;
_refine_ls_shift/su_max                0.0000
_refine_diff_density_max               9.63
_refine_diff_density_min               -5.30
_refine_ls_extinction_method           none
_refine_ls_extinction_coef             ?
_refine_ls_abs_structure_details
   'Flack, H. D. (1983), Acta Cryst. A39, 876-881.  3555 Friedel Pairs'
_refine_ls_abs_structure_Flack         0.521(15)

loop_
_atom_type_symbol
_atom_type_description
_atom_type_scat_dispersion_real
_atom_type_scat_dispersion_imag
_atom_type_scat_source
  'C' 'C'  0.003 0.002 
;
International Tables for Crystallography
(1992, Vol. C, Tables 4.2.6.8 and 6.1.1.4)
;
  'H' 'H'  0.000 0.000 
;
International Tables for Crystallography
(1992, Vol. C, Table 6.1.1.4)
;
  'N' 'N'  0.006 0.003 
;
International Tables for Crystallography
(1992, Vol. C, Tables 4.2.6.8 and 6.1.1.4)
;
  'O' 'O'  0.011 0.006 
;
International Tables for Crystallography
(1992, Vol. C, Tables 4.2.6.8 and 6.1.1.4)
;
  'Fe' 'Fe'  0.346 0.844 
;
International Tables for Crystallography
(1992, Vol. C, Tables 4.2.6.8 and 6.1.1.4)
;

#==============================================================================

# ATOMIC COORDINATES AND THERMAL PARAMETERS

loop_
_atom_site_label
_atom_site_type_symbol
_atom_site_fract_x
_atom_site_fract_y
_atom_site_fract_z
_atom_site_U_iso_or_equiv
_atom_site_adp_type
_atom_site_occupancy
_atom_site_symmetry_multiplicity
_atom_site_calc_flag
_atom_site_refinement_flags
_atom_site_disorder_assembly
_atom_site_disorder_group
 Fe(1) Fe 0.0000 0.0000 0.0000 0.01086(11) Uani 1.00 4 d S . .
 Fe(2) Fe 0.5000 0.0000 -0.051560(10) 0.01063(9) Uani 1.00 2 d S . .
 Fe(3) Fe 0.0000 0.0000 0.5000 0.01043(11) Uani 1.00 4 d S . .
 O(1) O 0.4111(2) -0.20889(15) 0.18480(10) 0.1183(11) Uani 1.00 1 d . . .
 O(2) O 0.11125(13) -0.21655(12) 0.22886(9) 0.0629(7) Uani 1.00 1 d . . .
 O(3) O -0.04022(14) -0.21829(15) 0.21903(9) 0.0780(8) Uani 1.00 1 d . . .
 O(4) O 0.32425(11) -0.08482(12) 0.16874(8) 0.0577(6) Uani 1.00 1 d . . .
 O(5) O 0.23719(11) -0.06241(12) 0.26337(8) 0.0545(6) Uani 1.00 1 d . . .
 O(6) O 0.3184(2) 0.17427(18) 0.20198(13) 0.1446(13) Uani 1.00 1 d . . .
 O(7) O 0.24965(14) 0.08439(14) 0.29310(12) 0.0802(8) Uani 1.00 1 d . . .
 N(1) N 0.12315(11) 0.01536(10) -0.00123(8) 0.0164(5) Uani 1.00 1 d . . .
 N(2) N 0.37786(10) 0.02357(10) -0.04989(9) 0.0172(4) Uani 1.00 1 d . . .
 N(3) N 0.52148(10) 0.12167(10) -0.05070(9) 0.0174(4) Uani 1.00 1 d . . .
 N(4) N -0.12315(11) 0.01431(11) 0.49929(8) 0.0180(5) Uani 1.00 1 d . . .
 N(5) N 0.0000 0.0000 0.09527(11) 0.0168(7) Uani 1.00 2 d S . .
 N(6) N 0.0000 0.0000 0.40400(11) 0.0135(6) Uani 1.00 2 d S . .
 N(7) N 0.5000 0.0000 0.04405(7) 0.0157(6) Uani 1.00 2 d S . .
 N(8) N 0.5000 0.0000 -0.14632(7) 0.0164(6) Uani 1.00 2 d S . .
 C(1) C 0.18285(13) 0.04317(12) -0.00895(10) 0.0147(6) Uani 1.00 1 d . . .
 C(2) C 0.25135(12) 0.08525(13) -0.01691(10) 0.0155(5) Uani 1.00 1 d . . .
 C(3) C 0.31903(14) 0.04827(12) -0.03517(10) 0.0168(6) Uani 1.00 1 d . . .
 C(4) C 0.25080(14) 0.16801(14) -0.00670(12) 0.0216(6) Uani 1.00 1 d . . .
 C(5) C 0.18588(13) 0.20705(13) 0.01415(10) 0.0182(6) Uani 1.00 1 d . . .
 C(6) C 0.18561(13) 0.28645(13) 0.02422(12) 0.0195(6) Uani 1.00 1 d . . .
 C(7) C 0.25054(13) 0.32985(13) 0.01283(10) 0.0158(5) Uani 1.00 1 d . . .
 C(8) C 0.31615(16) 0.29374(14) -0.00904(13) 0.0316(7) Uani 1.00 1 d . . .
 C(9) C 0.31707(14) 0.21521(15) -0.01805(14) 0.0298(7) Uani 1.00 1 d . . .
 C(10) C -0.24932(14) 0.08375(13) 0.47789(11) 0.0188(6) Uani 1.00 1 d . . .
 C(11) C -0.18313(12) 0.04233(13) 0.48916(10) 0.0152(6) Uani 1.00 1 d . . .
 C(12) C 0.54680(13) 0.18162(12) -0.03749(9) 0.0148(6) Uani 1.00 1 d . . .
 C(13) C -0.05929(15) 0.02891(15) 0.12536(10) 0.0237(6) Uani 1.00 1 d . . .
 C(14) C -0.06107(16) 0.03107(15) 0.18604(10) 0.0293(6) Uani 1.00 1 d . . .
 C(15) C 0.0000 0.0000 0.21762(15) 0.0194(8) Uani 1.00 2 d S . .
 C(16) C 0.0000 0.0000 0.28213(13) 0.0234(9) Uani 1.00 2 d S . .
 C(17) C -0.04022(14) 0.05604(15) 0.31456(10) 0.0235(6) Uani 1.00 1 d . . .
 C(18) C -0.03899(14) 0.05333(15) 0.37384(10) 0.0243(6) Uani 1.00 1 d . . .
 C(19) C 0.46538(11) 0.05568(11) 0.07461(8) 0.0231(5) Uani 1.00 1 d . . .
 C(20) C 0.46374(12) 0.05860(12) 0.13498(8) 0.0246(5) Uani 1.00 1 d . . .
 C(21) C 0.5000 0.0000 0.16692(9) 0.0217(8) Uani 1.00 2 d S . .
 C(22) C 0.5000 0.0000 0.23099(8) 0.0184(8) Uani 1.00 2 d S . .
 C(23) C 0.43997(11) 0.03299(12) 0.26293(8) 0.0251(5) Uani 1.00 1 d . . .
 C(24) C 0.53230(11) -0.05790(11) -0.17698(8) 0.0221(5) Uani 1.00 1 d . . .
 C(25) C 0.4486(2) -0.2471(2) 0.13931(15) 0.0924(13) Uani 1.00 1 d . . .
 C(26) C 0.15561(17) -0.22975(18) 0.17670(12) 0.0576(9) Uani 1.00 1 d . . .
 C(27) C -0.0619(2) -0.2360(3) 0.16120(17) 0.139(2) Uani 1.00 1 d . . .
 C(28) C 0.3001(2) -0.0850(2) 0.10865(13) 0.0812(12) Uani 1.00 1 d . . .
 C(29) C 0.2655(2) -0.11552(19) 0.30572(15) 0.0728(11) Uani 1.00 1 d . . .
 C(30) C 0.2817(4) 0.1681(4) 0.1490(3) 0.385(5) Uani 1.00 1 d . . .
 C(31) C 0.1922(2) 0.1063(2) 0.3311(2) 0.161(2) Uani 1.00 1 d . . .
 H(1) H 0.1401 0.1784 0.0218 0.022 Uiso 1.00 1 c R . .
 H(2) H 0.1402 0.3109 0.0386 0.024 Uiso 1.00 1 c R . .
 H(3) H 0.3606 0.3236 -0.0182 0.038 Uiso 1.00 1 c R . .
 H(4) H 0.3631 0.1915 -0.0320 0.036 Uiso 1.00 1 c R . .
 H(5) H -0.1021 0.0490 0.1042 0.028 Uiso 1.00 1 c R . .
 H(6) H -0.1039 0.0537 0.2056 0.036 Uiso 1.00 1 c R . .
 H(7) H -0.0682 0.0956 0.2950 0.029 Uiso 1.00 1 c R . .
 H(8) H -0.0675 0.0913 0.3947 0.029 Uiso 1.00 1 c R . .
 H(9) H 0.4404 0.0959 0.0536 0.028 Uiso 1.00 1 c R . .
 H(10) H 0.4382 0.0999 0.1545 0.030 Uiso 1.00 1 c R . .
 H(11) H 0.3976 0.0565 0.2434 0.031 Uiso 1.00 1 c R . .
 H(12) H 0.5552 -0.0993 -0.1559 0.027 Uiso 1.00 1 c R . .
 H(13) H 0.5013 -0.2549 0.1493 0.111 Uiso 1.00 1 c R . .
 H(14) H 0.4244 -0.2957 0.1329 0.111 Uiso 1.00 1 c R . .
 H(15) H 0.4455 -0.2170 0.1047 0.111 Uiso 1.00 1 c R . .
 H(16) H 0.1253 -0.2586 0.1498 0.070 Uiso 1.00 1 c R . .
 H(17) H 0.1693 -0.1815 0.1597 0.070 Uiso 1.00 1 c R . .
 H(18) H 0.2012 -0.2579 0.1859 0.070 Uiso 1.00 1 c R . .
 H(19) H -0.1127 -0.2178 0.1537 0.167 Uiso 1.00 1 c R . .
 H(20) H -0.0603 -0.2905 0.1561 0.167 Uiso 1.00 1 c R . .
 H(21) H -0.0267 -0.2122 0.1348 0.167 Uiso 1.00 1 c R . .
 H(22) H 0.2670 -0.1277 0.1014 0.097 Uiso 1.00 1 c R . .
 H(23) H 0.2732 -0.0382 0.1008 0.098 Uiso 1.00 1 c R . .
 H(24) H 0.3442 -0.0883 0.0841 0.097 Uiso 1.00 1 c R . .
 H(25) H 0.2299 -0.1193 0.3372 0.088 Uiso 1.00 1 c R . .
 H(26) H 0.2718 -0.1649 0.2881 0.088 Uiso 1.00 1 c R . .
 H(27) H 0.3140 -0.0980 0.3200 0.088 Uiso 1.00 1 c R . .
 H(28) H 0.2921 0.2157 0.1297 0.462 Uiso 1.00 1 c R . .
 H(29) H 0.2274 0.1614 0.1527 0.462 Uiso 1.00 1 c R . .
 H(30) H 0.3028 0.1267 0.1269 0.462 Uiso 1.00 1 c R . .
 H(31) H 0.1444 0.0854 0.3180 0.193 Uiso 1.00 1 c R . .
 H(32) H 0.1887 0.1611 0.3323 0.193 Uiso 1.00 1 c R . .
 H(33) H 0.2035 0.0871 0.3690 0.193 Uiso 1.00 1 c R . .


loop_
_atom_site_aniso_label
_atom_site_aniso_U_11
_atom_site_aniso_U_22
_atom_site_aniso_U_33
_atom_site_aniso_U_12
_atom_site_aniso_U_13
_atom_site_aniso_U_23
 Fe(1) 0.0108(2) 0.0108(2) 0.0109(3) 0.0000 0.0000 0.0000
 Fe(2) 0.0121(2) 0.0101(2) 0.00966(14) -0.0003(2) 0.0000 0.0000
 Fe(3) 0.0101(2) 0.0101(2) 0.0111(3) 0.0000 0.0000 0.0000
 O(1) 0.224(3) 0.0888(18) 0.0418(14) 0.080(2) 0.0076(18) 0.0006(13)
 O(2) 0.0806(15) 0.0636(14) 0.0444(12) -0.0090(11) 0.0063(11) -0.0090(10)
 O(3) 0.0803(16) 0.1077(19) 0.0459(13) -0.0088(14) 0.0178(12) 0.0030(13)
 O(4) 0.0567(12) 0.0846(15) 0.0319(10) -0.0100(10) -0.0013(9) -0.0058(10)
 O(5) 0.0524(12) 0.0664(12) 0.0447(11) -0.0033(10) -0.0003(9) -0.0047(10)
 O(6) 0.215(3) 0.127(2) 0.092(2) 0.113(2) -0.093(2) -0.0697(18)
 O(7) 0.0648(14) 0.0789(16) 0.0969(19) 0.0034(13) 0.0148(13) -0.0225(15)
 N(1) 0.0123(9) 0.0108(10) 0.0262(11) -0.0015(8) 0.0027(9) -0.0015(8)
 N(2) 0.0114(9) 0.0143(9) 0.0258(10) 0.0036(8) 0.0020(9) 0.0007(9)
 N(3) 0.0145(9) 0.0183(10) 0.0193(9) 0.0041(8) 0.0001(9) 0.0016(9)
 N(4) 0.0165(9) 0.0173(11) 0.0203(10) -0.0025(9) -0.0007(9) -0.0002(9)
 N(5) 0.0156(14) 0.0236(15) 0.0113(13) 0.0076(16) 0.0000 0.0000
 N(6) 0.0124(12) 0.0129(13) 0.0153(13) -0.0051(15) 0.0000 0.0000
 N(7) 0.0218(14) 0.0121(13) 0.0132(8) 0.0049(18) 0.0000 0.0000
 N(8) 0.0302(16) 0.0066(12) 0.0123(8) -0.0016(19) 0.0000 0.0000
 C(1) 0.0196(12) 0.0101(12) 0.0143(12) 0.0056(10) -0.0008(10) -0.0005(9)
 C(2) 0.0056(10) 0.0156(11) 0.0253(12) -0.0004(8) 0.0001(10) -0.0018(9)
 C(3) 0.0240(13) 0.0059(11) 0.0205(13) -0.0009(10) -0.0024(10) 0.0002(9)
 C(4) 0.0161(13) 0.0170(12) 0.0318(14) -0.0023(10) -0.0007(10) 0.0060(11)
 C(5) 0.0093(11) 0.0192(12) 0.0260(13) -0.0004(9) 0.0104(10) 0.0005(10)
 C(6) 0.0122(12) 0.0110(12) 0.0352(14) -0.0022(9) 0.0029(10) -0.0021(10)
 C(7) 0.0156(12) 0.0117(11) 0.0200(12) 0.0023(9) 0.0069(9) -0.0033(9)
 C(8) 0.0193(14) 0.0149(13) 0.0606(19) -0.0039(10) 0.0089(14) -0.0057(13)
 C(9) 0.0124(13) 0.0253(15) 0.0516(18) 0.0030(10) 0.0121(12) -0.0032(13)
 C(10) 0.0208(13) 0.0144(11) 0.0212(12) 0.0026(10) -0.0043(11) 0.0004(10)
 C(11) 0.0084(10) 0.0152(13) 0.0218(13) -0.0020(9) -0.0018(10) -0.0032(10)
 C(12) 0.0197(13) 0.0091(11) 0.0156(12) 0.0069(10) 0.0004(9) 0.0003(9)
 C(13) 0.0211(11) 0.0403(14) 0.0096(11) 0.0072(10) -0.0014(9) 0.0003(9)
 C(14) 0.0264(13) 0.0436(15) 0.0180(12) 0.0122(12) 0.0094(11) 0.0031(11)
 C(15) 0.0098(14) 0.0235(18) 0.0250(17) -0.002(2) 0.0000 0.0000
 C(16) 0.0239(19) 0.044(2) 0.0018(15) -0.001(2) 0.0000 0.0000
 C(17) 0.0297(13) 0.0222(12) 0.0184(11) 0.0073(10) -0.0030(10) -0.0055(11)
 C(18) 0.0222(12) 0.0279(13) 0.0229(13) 0.0070(10) 0.0006(9) -0.0004(11)
 C(19) 0.0324(11) 0.0232(10) 0.0137(9) 0.0053(8) -0.0011(8) 0.0046(8)
 C(20) 0.0322(11) 0.0253(10) 0.0164(10) 0.0055(9) 0.0013(8) -0.0047(8)
 C(21) 0.0143(17) 0.039(2) 0.0124(10) 0.006(2) 0.0000 0.0000
 C(22) 0.0221(19) 0.026(2) 0.0069(9) -0.006(2) 0.0000 0.0000
 C(23) 0.0211(10) 0.0384(11) 0.0158(10) 0.0080(9) -0.0012(8) 0.0000(8)
 C(24) 0.0303(10) 0.0168(9) 0.0191(10) 0.0071(8) -0.0003(8) -0.0001(8)
 C(25) 0.149(3) 0.062(2) 0.066(2) 0.012(2) -0.028(2) -0.0065(19)
 C(26) 0.0662(19) 0.065(2) 0.0420(17) 0.0065(15) -0.0069(15) 0.0060(15)
 C(27) 0.067(2) 0.288(7) 0.062(2) -0.063(3) 0.011(2) -0.011(3)
 C(28) 0.067(2) 0.125(3) 0.052(2) -0.016(2) -0.0037(18) 0.000(2)
 C(29) 0.081(2) 0.081(2) 0.056(2) -0.0186(19) -0.0048(19) -0.0037(19)
 C(30) 0.467(11) 0.429(11) 0.259(7) 0.387(9) -0.313(8) -0.243(7)
 C(31) 0.078(3) 0.136(4) 0.269(6) -0.042(2) 0.084(3) -0.127(4)

#==============================================================================

_computing_data_collection            'CrystalClear'
_computing_cell_refinement            'CrystalClear'
_computing_data_reduction             'CrystalStructure'
_computing_structure_solution         'SIR2002'
_computing_structure_refinement       'CRYSTALS'
_computing_publication_material       'CrystalStructure 3.8'
_computing_molecular_graphics          ?

#==============================================================================

# MOLECULAR GEOMETRY

_geom_special_details
;
    ENTER SPECIAL DETAILS OF THE MOLECULAR GEOMETRY
;

loop_
_geom_bond_atom_site_label_1
_geom_bond_atom_site_label_2
_geom_bond_distance
_geom_bond_publ_flag
_geom_bond_site_symmetry_1
_geom_bond_site_symmetry_2
Fe(1) N(1) 2.1463(19) yes . .
Fe(1) N(1) 2.1463(17) yes . 2_555
Fe(1) N(1) 2.1463(19) yes . 3_555
Fe(1) N(1) 2.1463(17) yes . 4_555
Fe(1) N(5) 2.181(2) yes . .
Fe(1) N(5) 2.181(2) yes . 2_555
Fe(2) N(2) 2.1514(17) yes . .
Fe(2) N(2) 2.1514(17) yes . 3_655
Fe(2) N(3) 2.1366(17) yes . .
Fe(2) N(3) 2.1366(17) yes . 3_655
Fe(2) N(7) 2.1891(16) yes . .
Fe(2) N(8) 2.1696(16) yes . .
Fe(3) N(4) 2.1440(19) yes . .
Fe(3) N(4) 2.1440(19) yes . 2_556
Fe(3) N(4) 2.1440(19) yes . 3_555
Fe(3) N(4) 2.1440(19) yes . 4_556
Fe(3) N(6) 2.198(2) yes . .
Fe(3) N(6) 2.198(2) yes . 2_556
O(1) C(25) 1.394(4) yes . .
O(2) C(26) 1.438(3) yes . .
O(3) C(27) 1.409(4) yes . .
O(4) C(28) 1.438(3) yes . .
O(5) C(29) 1.423(3) yes . .
O(6) C(30) 1.373(8) yes . .
O(7) C(31) 1.373(5) yes . .
N(1) C(1) 1.153(2) yes . .
N(2) C(3) 1.154(2) yes . .
N(3) C(12) 1.165(2) yes . .
N(4) C(11) 1.168(2) yes . .
N(5) C(13) 1.333(2) yes . .
N(5) C(13) 1.333(2) yes . 3_555
N(6) C(18) 1.335(2) yes . .
N(6) C(18) 1.335(2) yes . 3_555
N(7) C(19) 1.332(2) yes . .
N(7) C(19) 1.332(2) yes . 3_655
N(8) C(24) 1.344(2) yes . .
N(8) C(24) 1.344(2) yes . 3_655
C(1) C(2) 1.402(3) yes . .
C(2) C(3) 1.398(3) yes . .
C(2) C(4) 1.450(3) yes . .
C(4) C(5) 1.394(3) yes . .
C(4) C(9) 1.431(3) yes . .
C(5) C(6) 1.392(3) yes . .
C(6) C(7) 1.375(3) yes . .
C(7) C(8) 1.388(3) yes . .
C(7) C(10) 1.509(3) yes . 7_555
C(8) C(9) 1.374(3) yes . .
C(10) C(11) 1.375(3) yes . .
C(10) C(12) 1.399(3) yes . 8_445
C(13) C(14) 1.390(3) yes . .
C(14) C(15) 1.388(3) yes . .
C(15) C(16) 1.477(4) yes . .
C(16) C(17) 1.405(2) yes . .
C(16) C(17) 1.405(2) yes . 3_555
C(17) C(18) 1.358(3) yes . .
C(19) C(20) 1.383(2) yes . .
C(20) C(21) 1.398(2) yes . .
C(21) C(22) 1.467(2) yes . .
C(22) C(23) 1.392(2) yes . .
C(22) C(23) 1.392(2) yes . 3_655
C(23) C(24) 1.376(2) yes . 8_545
C(5) H(1) 0.950 no . .
C(6) H(2) 0.950 no . .
C(8) H(3) 0.950 no . .
C(9) H(4) 0.950 no . .
C(13) H(5) 0.950 no . .
C(14) H(6) 0.950 no . .
C(17) H(7) 0.950 no . .
C(18) H(8) 0.950 no . .
C(19) H(9) 0.950 no . .
C(20) H(10) 0.950 no . .
C(23) H(11) 0.950 no . .
C(24) H(12) 0.950 no . .
C(25) H(13) 0.950 no . .
C(25) H(14) 0.950 no . .
C(25) H(15) 0.950 no . .
C(26) H(16) 0.950 no . .
C(26) H(17) 0.950 no . .
C(26) H(18) 0.950 no . .
C(27) H(19) 0.950 no . .
C(27) H(20) 0.950 no . .
C(27) H(21) 0.950 no . .
C(28) H(22) 0.950 no . .
C(28) H(23) 0.950 no . .
C(28) H(24) 0.950 no . .
C(29) H(25) 0.950 no . .
C(29) H(26) 0.950 no . .
C(29) H(27) 0.950 no . .
C(30) H(28) 0.950 no . .
C(30) H(29) 0.950 no . .
C(30) H(30) 0.950 no . .
C(31) H(31) 0.950 no . .
C(31) H(32) 0.950 no . .
C(31) H(33) 0.950 no . .

loop_
_geom_angle_atom_site_label_1
_geom_angle_atom_site_label_2
_geom_angle_atom_site_label_3
_geom_angle
_geom_angle_publ_flag
_geom_angle_site_symmetry_1
_geom_angle_site_symmetry_2
_geom_angle_site_symmetry_3
N(1) Fe(1) N(1) 90.01(6) yes . . 2_555
N(1) Fe(1) N(1) 178.50(6) yes . . 3_555
N(1) Fe(1) N(1) 90.01(6) yes . . 4_555
N(1) Fe(1) N(5) 90.75(4) yes . . .
N(1) Fe(1) N(5) 89.25(4) yes . . 2_555
N(1) Fe(1) N(1) 90.01(6) yes 2_555 . 3_555
N(1) Fe(1) N(1) 178.50(6) yes 2_555 . 4_555
N(1) Fe(1) N(5) 89.25(4) yes 2_555 . .
N(1) Fe(1) N(5) 90.75(4) yes 2_555 . 2_555
N(1) Fe(1) N(1) 90.01(6) yes 3_555 . 4_555
N(1) Fe(1) N(5) 90.75(4) yes 3_555 . .
N(1) Fe(1) N(5) 89.25(4) yes 3_555 . 2_555
N(1) Fe(1) N(5) 89.25(4) yes 4_555 . .
N(1) Fe(1) N(5) 90.75(4) yes 4_555 . 2_555
N(5) Fe(1) N(5) 180.0000 yes . . 2_555
N(2) Fe(2) N(2) 177.96(7) yes . . 3_655
N(2) Fe(2) N(3) 89.08(6) yes . . .
N(2) Fe(2) N(3) 90.90(6) yes . . 3_655
N(2) Fe(2) N(7) 88.98(5) yes . . .
N(2) Fe(2) N(8) 91.02(5) yes . . .
N(2) Fe(2) N(3) 90.90(6) yes 3_655 . .
N(2) Fe(2) N(3) 89.08(6) yes 3_655 . 3_655
N(2) Fe(2) N(7) 88.98(5) yes 3_655 . .
N(2) Fe(2) N(8) 91.02(5) yes 3_655 . .
N(3) Fe(2) N(3) 178.94(7) yes . . 3_655
N(3) Fe(2) N(7) 89.47(5) yes . . .
N(3) Fe(2) N(8) 90.53(5) yes . . .
N(3) Fe(2) N(7) 89.47(5) yes 3_655 . .
N(3) Fe(2) N(8) 90.53(5) yes 3_655 . .
N(7) Fe(2) N(8) 180.0000 yes . . .
N(4) Fe(3) N(4) 90.00(7) yes . . 2_556
N(4) Fe(3) N(4) 179.13(6) yes . . 3_555
N(4) Fe(3) N(4) 90.00(7) yes . . 4_556
N(4) Fe(3) N(6) 89.57(4) yes . . .
N(4) Fe(3) N(6) 90.43(4) yes . . 2_556
N(4) Fe(3) N(4) 90.00(7) yes 2_556 . 3_555
N(4) Fe(3) N(4) 179.13(6) yes 2_556 . 4_556
N(4) Fe(3) N(6) 90.43(4) yes 2_556 . .
N(4) Fe(3) N(6) 89.57(4) yes 2_556 . 2_556
N(4) Fe(3) N(4) 90.00(7) yes 3_555 . 4_556
N(4) Fe(3) N(6) 89.57(4) yes 3_555 . .
N(4) Fe(3) N(6) 90.43(4) yes 3_555 . 2_556
N(4) Fe(3) N(6) 90.43(4) yes 4_556 . .
N(4) Fe(3) N(6) 89.57(4) yes 4_556 . 2_556
N(6) Fe(3) N(6) 180.0000 yes . . 2_556
Fe(1) N(1) C(1) 160.47(17) yes . . .
Fe(2) N(2) C(3) 160.23(18) yes . . .
Fe(2) N(3) C(12) 160.69(17) yes . . .
Fe(3) N(4) C(11) 158.65(17) yes . . .
Fe(1) N(5) C(13) 121.13(13) yes . . .
Fe(1) N(5) C(13) 121.13(13) yes . . 3_555
C(13) N(5) C(13) 117.7(2) yes . . 3_555
Fe(3) N(6) C(18) 121.15(13) yes . . .
Fe(3) N(6) C(18) 121.15(13) yes . . 3_555
C(18) N(6) C(18) 117.7(2) yes . . 3_555
Fe(2) N(7) C(19) 121.68(9) yes . . .
Fe(2) N(7) C(19) 121.68(9) yes . . 3_655
C(19) N(7) C(19) 116.64(16) yes . . 3_655
Fe(2) N(8) C(24) 121.48(9) yes . . .
Fe(2) N(8) C(24) 121.48(9) yes . . 3_655
C(24) N(8) C(24) 117.04(16) yes . . 3_655
N(1) C(1) C(2) 173.3(2) yes . . .
C(1) C(2) C(3) 120.6(2) yes . . .
C(1) C(2) C(4) 119.06(19) yes . . .
C(3) C(2) C(4) 120.35(19) yes . . .
N(2) C(3) C(2) 174.4(2) yes . . .
C(2) C(4) C(5) 122.6(2) yes . . .
C(2) C(4) C(9) 121.9(2) yes . . .
C(5) C(4) C(9) 115.5(2) yes . . .
C(4) C(5) C(6) 122.5(2) yes . . .
C(5) C(6) C(7) 120.3(2) yes . . .
C(6) C(7) C(8) 119.3(2) yes . . .
C(6) C(7) C(10) 121.0(2) yes . . 7_555
C(8) C(7) C(10) 119.7(2) yes . . 7_555
C(7) C(8) C(9) 120.5(2) yes . . .
C(4) C(9) C(8) 121.8(2) yes . . .
C(7) C(10) C(11) 119.4(2) yes 7_455 . .
C(7) C(10) C(12) 119.1(2) yes 7_455 . 8_445
C(11) C(10) C(12) 121.3(2) yes . . 8_445
N(4) C(11) C(10) 173.1(2) yes . . .
N(3) C(12) C(10) 174.9(2) yes . . 8_554
N(5) C(13) C(14) 122.9(2) yes . . .
C(13) C(14) C(15) 119.6(2) yes . . .
C(14) C(15) C(14) 117.2(2) yes . . 3_555
C(14) C(15) C(16) 121.39(15) yes . . .
C(14) C(15) C(16) 121.39(15) yes 3_555 . .
C(15) C(16) C(17) 121.90(14) yes . . .
C(15) C(16) C(17) 121.90(14) yes . . 3_555
C(17) C(16) C(17) 116.2(2) yes . . 3_555
C(16) C(17) C(18) 119.8(2) yes . . .
N(6) C(18) C(17) 123.3(2) yes . . .
N(7) C(19) C(20) 124.08(17) yes . . .
C(19) C(20) C(21) 119.14(17) yes . . .
C(20) C(21) C(20) 116.93(18) yes . . 3_655
C(20) C(21) C(22) 121.54(10) yes . . .
C(20) C(21) C(22) 121.54(10) yes 3_655 . .
C(21) C(22) C(23) 121.69(9) yes . . .
C(21) C(22) C(23) 121.69(9) yes . . 3_655
C(23) C(22) C(23) 116.62(16) yes . . 3_655
C(22) C(23) C(24) 120.11(17) yes . . 8_545
N(8) C(24) C(23) 123.06(17) yes . . 8_544
C(4) C(5) H(1) 118.7 no . . .
C(6) C(5) H(1) 118.8 no . . .
C(5) C(6) H(2) 119.9 no . . .
C(7) C(6) H(2) 119.8 no . . .
C(7) C(8) H(3) 119.8 no . . .
C(9) C(8) H(3) 119.7 no . . .
C(4) C(9) H(4) 119.0 no . . .
C(8) C(9) H(4) 119.1 no . . .
N(5) C(13) H(5) 118.2 no . . .
C(14) C(13) H(5) 118.9 no . . .
C(13) C(14) H(6) 120.0 no . . .
C(15) C(14) H(6) 120.4 no . . .
C(16) C(17) H(7) 119.9 no . . .
C(18) C(17) H(7) 120.3 no . . .
N(6) C(18) H(8) 118.7 no . . .
C(17) C(18) H(8) 118.0 no . . .
N(7) C(19) H(9) 117.9 no . . .
C(20) C(19) H(9) 118.0 no . . .
C(19) C(20) H(10) 120.4 no . . .
C(21) C(20) H(10) 120.5 no . . .
C(22) C(23) H(11) 120.2 no . . .
C(24) C(23) H(11) 119.7 no 8_545 . .
N(8) C(24) H(12) 117.9 no . . .
C(23) C(24) H(12) 119.0 no 8_544 . .
O(1) C(25) H(13) 109.5 no . . .
O(1) C(25) H(14) 109.3 no . . .
O(1) C(25) H(15) 109.6 no . . .
H(13) C(25) H(14) 109.5 no . . .
H(13) C(25) H(15) 109.5 no . . .
H(14) C(25) H(15) 109.5 no . . .
O(2) C(26) H(16) 109.1 no . . .
O(2) C(26) H(17) 109.5 no . . .
O(2) C(26) H(18) 109.8 no . . .
H(16) C(26) H(17) 109.5 no . . .
H(16) C(26) H(18) 109.5 no . . .
H(17) C(26) H(18) 109.5 no . . .
O(3) C(27) H(19) 110.1 no . . .
O(3) C(27) H(20) 108.8 no . . .
O(3) C(27) H(21) 109.5 no . . .
H(19) C(27) H(20) 109.5 no . . .
H(19) C(27) H(21) 109.5 no . . .
H(20) C(27) H(21) 109.5 no . . .
O(4) C(28) H(22) 110.1 no . . .
O(4) C(28) H(23) 108.8 no . . .
O(4) C(28) H(24) 109.5 no . . .
H(22) C(28) H(23) 109.5 no . . .
H(22) C(28) H(24) 109.5 no . . .
H(23) C(28) H(24) 109.5 no . . .
O(5) C(29) H(25) 109.7 no . . .
O(5) C(29) H(26) 109.2 no . . .
O(5) C(29) H(27) 109.5 no . . .
H(25) C(29) H(26) 109.5 no . . .
H(25) C(29) H(27) 109.5 no . . .
H(26) C(29) H(27) 109.5 no . . .
O(6) C(30) H(28) 104.9 no . . .
O(6) C(30) H(29) 112.8 no . . .
O(6) C(30) H(30) 110.6 no . . .
H(28) C(30) H(29) 109.5 no . . .
H(28) C(30) H(30) 109.5 no . . .
H(29) C(30) H(30) 109.5 no . . .
O(7) C(31) H(31) 109.0 no . . .
O(7) C(31) H(32) 109.9 no . . .
O(7) C(31) H(33) 109.5 no . . .
H(31) C(31) H(32) 109.5 no . . .
H(31) C(31) H(33) 109.5 no . . .
H(32) C(31) H(33) 109.5 no . . .

loop_
_geom_torsion_atom_site_label_1
_geom_torsion_atom_site_label_2
_geom_torsion_atom_site_label_3
_geom_torsion_atom_site_label_4
_geom_torsion
_geom_torsion_publ_flag
_geom_torsion_site_symmetry_1
_geom_torsion_site_symmetry_2
_geom_torsion_site_symmetry_3
_geom_torsion_site_symmetry_4
N(1) Fe(1) N(1) C(1) 25.7(5) ? . . 2_555 2_555
N(1) Fe(1) N(1) C(1) 155.8(5) ? 2_555 . . .
N(1) Fe(1) N(1) C(1) 65(2) ? . . 3_555 3_555
N(1) Fe(1) N(1) C(1) 65(2) ? 3_555 . . .
N(1) Fe(1) N(1) C(1) -155.8(5) ? . . 4_555 4_555
N(1) Fe(1) N(1) C(1) -25.7(5) ? 4_555 . . .
N(1) Fe(1) N(5) C(13) 146.90(13) ? . . . .
N(1) Fe(1) N(5) C(13) -33.10(13) ? . . . 3_555
N(5) Fe(1) N(1) C(1) -114.9(5) ? . . . .
N(1) Fe(1) N(5) C(13) -56.90(13) ? . . 2_555 2_555
N(5) Fe(1) N(1) C(1) 65.1(5) ? 2_555 . . .
N(1) Fe(1) N(1) C(1) -25.7(5) ? 2_555 . 3_555 3_555
N(1) Fe(1) N(1) C(1) -155.8(5) ? 3_555 . 2_555 2_555
N(1) Fe(1) N(1) C(1) -65(2) ? 2_555 . 4_555 4_555
N(1) Fe(1) N(1) C(1) -65(2) ? 4_555 . 2_555 2_555
N(1) Fe(1) N(5) C(13) -123.10(13) ? 2_555 . . .
N(1) Fe(1) N(5) C(13) 56.90(13) ? 2_555 . . 3_555
N(5) Fe(1) N(1) C(1) -65.1(5) ? . . 2_555 2_555
N(1) Fe(1) N(5) C(13) -146.90(13) ? 2_555 . 2_555 2_555
N(5) Fe(1) N(1) C(1) 114.9(5) ? 2_555 . 2_555 2_555
N(1) Fe(1) N(1) C(1) 25.7(5) ? 3_555 . 4_555 4_555
N(1) Fe(1) N(1) C(1) 155.8(5) ? 4_555 . 3_555 3_555
N(1) Fe(1) N(5) C(13) -33.10(13) ? 3_555 . . .
N(1) Fe(1) N(5) C(13) 146.90(13) ? 3_555 . . 3_555
N(5) Fe(1) N(1) C(1) -114.9(5) ? . . 3_555 3_555
N(1) Fe(1) N(5) C(13) 123.10(13) ? 3_555 . 2_555 2_555
N(5) Fe(1) N(1) C(1) 65.1(5) ? 2_555 . 3_555 3_555
N(1) Fe(1) N(5) C(13) 56.90(13) ? 4_555 . . .
N(1) Fe(1) N(5) C(13) -123.10(13) ? 4_555 . . 3_555
N(5) Fe(1) N(1) C(1) -65.1(5) ? . . 4_555 4_555
N(1) Fe(1) N(5) C(13) 33.10(13) ? 4_555 . 2_555 2_555
N(5) Fe(1) N(1) C(1) 114.9(5) ? 2_555 . 4_555 4_555
N(2) Fe(2) N(2) C(3) 35(2) ? . . 3_655 3_655
N(2) Fe(2) N(2) C(3) 35(2) ? 3_655 . . .
N(2) Fe(2) N(3) C(12) 129.6(5) ? . . . .
N(3) Fe(2) N(2) C(3) -54.0(5) ? . . . .
N(2) Fe(2) N(3) C(12) -48.3(5) ? . . 3_655 3_655
N(3) Fe(2) N(2) C(3) 125.0(5) ? 3_655 . . .
N(2) Fe(2) N(7) C(19) -47.21(10) ? . . . .
N(2) Fe(2) N(7) C(19) 132.79(10) ? . . . 3_655
N(7) Fe(2) N(2) C(3) 35.5(5) ? . . . .
N(2) Fe(2) N(8) C(24) -130.08(10) ? . . . .
N(2) Fe(2) N(8) C(24) 49.92(10) ? . . . 3_655
N(8) Fe(2) N(2) C(3) -144.5(5) ? . . . .
N(2) Fe(2) N(3) C(12) -48.3(5) ? 3_655 . . .
N(3) Fe(2) N(2) C(3) 125.0(5) ? . . 3_655 3_655
N(2) Fe(2) N(3) C(12) 129.6(5) ? 3_655 . 3_655 3_655
N(3) Fe(2) N(2) C(3) -54.0(5) ? 3_655 . 3_655 3_655
N(2) Fe(2) N(7) C(19) 132.79(10) ? 3_655 . . .
N(2) Fe(2) N(7) C(19) -47.21(10) ? 3_655 . . 3_655
N(7) Fe(2) N(2) C(3) 35.5(5) ? . . 3_655 3_655
N(2) Fe(2) N(8) C(24) 49.92(10) ? 3_655 . . .
N(2) Fe(2) N(8) C(24) -130.08(10) ? 3_655 . . 3_655
N(8) Fe(2) N(2) C(3) -144.5(5) ? . . 3_655 3_655
N(3) Fe(2) N(3) C(12) 41(3) ? . . 3_655 3_655
N(3) Fe(2) N(3) C(12) 41(3) ? 3_655 . . .
N(3) Fe(2) N(7) C(19) 41.88(10) ? . . . .
N(3) Fe(2) N(7) C(19) -138.12(10) ? . . . 3_655
N(7) Fe(2) N(3) C(12) 40.6(5) ? . . . .
N(3) Fe(2) N(8) C(24) 140.83(10) ? . . . .
N(3) Fe(2) N(8) C(24) -39.17(10) ? . . . 3_655
N(8) Fe(2) N(3) C(12) -139.4(5) ? . . . .
N(3) Fe(2) N(7) C(19) -138.12(10) ? 3_655 . . .
N(3) Fe(2) N(7) C(19) 41.88(10) ? 3_655 . . 3_655
N(7) Fe(2) N(3) C(12) 40.6(5) ? . . 3_655 3_655
N(3) Fe(2) N(8) C(24) -39.17(10) ? 3_655 . . .
N(3) Fe(2) N(8) C(24) 140.83(10) ? 3_655 . . 3_655
N(8) Fe(2) N(3) C(12) -139.4(5) ? . . 3_655 3_655
N(4) Fe(3) N(4) C(11) 148.7(4) ? . . 2_556 2_556
N(4) Fe(3) N(4) C(11) 32.2(4) ? 2_556 . . .
N(4) Fe(3) N(4) C(11) -58(4) ? . . 3_555 3_555
N(4) Fe(3) N(4) C(11) -58(4) ? 3_555 . . .
N(4) Fe(3) N(4) C(11) -32.2(4) ? . . 4_556 4_556
N(4) Fe(3) N(4) C(11) -148.7(4) ? 4_556 . . .
N(4) Fe(3) N(6) C(18) 47.20(13) ? . . . .
N(4) Fe(3) N(6) C(18) -132.80(13) ? . . . 3_555
N(6) Fe(3) N(4) C(11) -58.3(4) ? . . . .
N(4) Fe(3) N(6) C(18) -137.20(13) ? . . 2_556 2_556
N(6) Fe(3) N(4) C(11) 121.7(4) ? 2_556 . . .
N(4) Fe(3) N(4) C(11) -148.7(4) ? 2_556 . 3_555 3_555
N(4) Fe(3) N(4) C(11) -32.2(4) ? 3_555 . 2_556 2_556
N(4) Fe(3) N(4) C(11) 58(4) ? 2_556 . 4_556 4_556
N(4) Fe(3) N(4) C(11) 58(4) ? 4_556 . 2_556 2_556
N(4) Fe(3) N(6) C(18) -42.80(13) ? 2_556 . . .
N(4) Fe(3) N(6) C(18) 137.20(13) ? 2_556 . . 3_555
N(6) Fe(3) N(4) C(11) -121.7(4) ? . . 2_556 2_556
N(4) Fe(3) N(6) C(18) -47.20(13) ? 2_556 . 2_556 2_556
N(6) Fe(3) N(4) C(11) 58.3(4) ? 2_556 . 2_556 2_556
N(4) Fe(3) N(4) C(11) 148.7(4) ? 3_555 . 4_556 4_556
N(4) Fe(3) N(4) C(11) 32.2(4) ? 4_556 . 3_555 3_555
N(4) Fe(3) N(6) C(18) -132.80(13) ? 3_555 . . .
N(4) Fe(3) N(6) C(18) 47.20(13) ? 3_555 . . 3_555
N(6) Fe(3) N(4) C(11) -58.3(4) ? . . 3_555 3_555
N(4) Fe(3) N(6) C(18) 42.80(13) ? 3_555 . 2_556 2_556
N(6) Fe(3) N(4) C(11) 121.7(4) ? 2_556 . 3_555 3_555
N(4) Fe(3) N(6) C(18) 137.20(13) ? 4_556 . . .
N(4) Fe(3) N(6) C(18) -42.80(13) ? 4_556 . . 3_555
N(6) Fe(3) N(4) C(11) -121.7(4) ? . . 4_556 4_556
N(4) Fe(3) N(6) C(18) 132.80(13) ? 4_556 . 2_556 2_556
N(6) Fe(3) N(4) C(11) 58.3(4) ? 2_556 . 4_556 4_556
Fe(1) N(1) C(1) C(2) 35(2) ? . . . .
Fe(2) N(2) C(3) C(2) 47(2) ? . . . .
Fe(2) N(3) C(12) C(10) 52(2) ? . . . 8_554
Fe(3) N(4) C(11) C(10) -34(2) ? . . . .
Fe(1) N(5) C(13) C(14) -179.01(18) ? . . . .
Fe(1) N(5) C(13) C(14) -179.01(18) ? . . 3_555 3_555
C(13) N(5) C(13) C(14) 1.0(3) ? . . 3_555 3_555
C(13) N(5) C(13) C(14) 1.0(3) ? 3_555 . . .
Fe(3) N(6) C(18) C(17) 179.47(18) ? . . . .
Fe(3) N(6) C(18) C(17) 179.47(18) ? . . 3_555 3_555
C(18) N(6) C(18) C(17) -0.5(3) ? . . 3_555 3_555
C(18) N(6) C(18) C(17) -0.5(3) ? 3_555 . . .
Fe(2) N(7) C(19) C(20) -179.87(14) ? . . . .
Fe(2) N(7) C(19) C(20) -179.87(14) ? . . 3_655 3_655
C(19) N(7) C(19) C(20) 0.1(2) ? . . 3_655 3_655
C(19) N(7) C(19) C(20) 0.13(19) ? 3_655 . . .
Fe(2) N(8) C(24) C(23) 179.63(13) ? . . . 8_544
C(24) N(8) C(24) C(23) -0.4(2) ? 3_655 . . 8_544
N(1) C(1) C(2) C(3) -176(2) ? . . . .
N(1) C(1) C(2) C(4) 3(2) ? . . . .
C(1) C(2) C(3) N(2) -178(2) ? . . . .
C(1) C(2) C(4) C(5) 3.9(3) ? . . . .
C(1) C(2) C(4) C(9) -175.4(2) ? . . . .
C(3) C(2) C(4) C(5) -176.9(2) ? . . . .
C(3) C(2) C(4) C(9) 3.8(3) ? . . . .
C(4) C(2) C(3) N(2) 3(2) ? . . . .
C(2) C(4) C(5) C(6) 179.6(2) ? . . . .
C(2) C(4) C(9) C(8) 179.2(2) ? . . . .
C(5) C(4) C(9) C(8) -0.2(3) ? . . . .
C(9) C(4) C(5) C(6) -1.0(3) ? . . . .
C(4) C(5) C(6) C(7) 1.0(3) ? . . . .
C(5) C(6) C(7) C(8) 0.3(3) ? . . . .
C(5) C(6) C(7) C(10) 178.5(2) ? . . . 7_555
C(6) C(7) C(8) C(9) -1.5(4) ? . . . .
C(6) C(7) C(10) C(11) 179.3(2) ? . . 7_555 7_555
C(8) C(7) C(10) C(11) -2.4(3) ? . . 7_555 7_555
C(10) C(7) C(8) C(9) -179.7(2) ? 7_555 . . .
C(7) C(8) C(9) C(4) 1.4(4) ? . . . .
C(7) C(10) C(11) N(4) -10(2) ? 7_455 . . .
C(7) C(10) C(12) N(3) 7(2) ? 7_455 . 8_445 8_445
C(11) C(10) C(12) N(3) -178(2) ? . . 8_445 8_445
C(12) C(10) C(11) N(4) 175.4(19) ? 8_445 . . .
N(5) C(13) C(14) C(15) -2.0(3) ? . . . .
C(13) C(14) C(15) C(14) 0.9(2) ? . . . 3_555
C(13) C(14) C(15) C(16) -179.08(17) ? . . . .
C(14) C(15) C(16) C(17) -27.37(17) ? . . . .
C(14) C(15) C(16) C(17) 152.63(17) ? . . . 3_555
C(14) C(15) C(16) C(17) 152.63(17) ? 3_555 . . .
C(14) C(15) C(16) C(17) -27.37(17) ? 3_555 . . 3_555
C(15) C(16) C(17) C(18) 179.51(16) ? . . . .
C(15) C(16) C(17) C(18) 179.51(16) ? . . 3_555 3_555
C(17) C(16) C(17) C(18) -0.5(2) ? . . 3_555 3_555
C(17) C(16) C(17) C(18) -0.5(2) ? 3_555 . . .
C(16) C(17) C(18) N(6) 1.0(3) ? . . . .
N(7) C(19) C(20) C(21) -0.3(2) ? . . . .
C(19) C(20) C(21) C(20) 0.1(2) ? . . . 3_655
C(19) C(20) C(21) C(22) -179.88(13) ? . . . .
C(20) C(21) C(22) C(23) 29.46(14) ? . . . .
C(20) C(21) C(22) C(23) -150.54(14) ? . . . 3_655
C(20) C(21) C(22) C(23) -150.54(14) ? 3_655 . . .
C(20) C(21) C(22) C(23) 29.46(14) ? 3_655 . . 3_655
C(21) C(22) C(23) C(24) -179.65(13) ? . . . 8_545
C(23) C(22) C(23) C(24) 0.4(2) ? 3_655 . . 8_545

loop_
_geom_contact_atom_site_label_1
_geom_contact_atom_site_label_2
_geom_contact_distance
_geom_contact_publ_flag
_geom_contact_site_symmetry_1
_geom_contact_site_symmetry_2
O(1) O(3) 2.673(3) ? . 7_545
O(1) O(4) 2.644(3) ? . .
O(1) C(20) 3.570(3) ? . 3_655
O(1) C(28) 3.364(4) ? . .
O(2) O(3) 2.629(3) ? . .
O(2) O(5) 3.532(2) ? . .
O(2) O(6) 2.748(3) ? . 5_545
O(2) C(14) 3.464(3) ? . 3_555
O(2) C(27) 3.387(4) ? . .
O(3) O(1) 2.673(3) ? . 7_445
O(3) O(2) 2.629(3) ? . .
O(3) C(25) 3.304(4) ? . 7_445
O(3) C(26) 3.528(3) ? . .
O(4) O(1) 2.644(3) ? . .
O(4) O(5) 2.667(2) ? . .
O(4) C(20) 3.545(2) ? . .
O(4) C(21) 3.3749(19) ? . .
O(4) C(23) 3.578(2) ? . .
O(4) C(25) 3.600(4) ? . .
O(4) C(29) 3.339(3) ? . .
O(5) O(2) 3.532(2) ? . .
O(5) O(4) 2.667(2) ? . .
O(5) O(7) 2.637(3) ? . .
O(5) C(14) 3.564(3) ? . 3_555
O(5) C(31) 3.394(5) ? . .
O(6) O(2) 2.748(3) ? . 5_555
O(6) O(7) 2.861(4) ? . .
O(6) C(20) 3.559(3) ? . .
O(6) C(23) 3.512(3) ? . .
O(6) C(26) 3.267(4) ? . 5_555
O(7) O(5) 2.637(3) ? . .
O(7) O(6) 2.861(4) ? . .
O(7) C(23) 3.478(3) ? . .
O(7) C(24) 3.515(3) ? . 8_545
O(7) C(29) 3.480(4) ? . .
N(3) C(6) 3.553(2) ? . 4_655
N(3) C(7) 3.511(2) ? . 4_655
N(8) C(22) 2.809(2) ? . 6_554
N(8) C(23) 2.392(2) ? . 6_554
C(5) C(30) 3.568(7) ? . .
C(6) N(3) 3.553(2) ? . 2_565
C(6) C(12) 2.900(3) ? . 2_565
C(6) C(28) 3.513(4) ? . 4_555
C(7) N(3) 3.511(2) ? . 2_565
C(7) C(12) 2.508(3) ? . 2_565
C(12) C(6) 2.900(3) ? . 4_655
C(12) C(7) 2.508(3) ? . 4_655
C(14) O(2) 3.464(3) ? . 3_555
C(14) O(5) 3.564(3) ? . 3_555
C(20) O(1) 3.570(3) ? . 3_655
C(20) O(4) 3.545(2) ? . .
C(20) O(6) 3.559(3) ? . .
C(20) C(25) 3.597(4) ? . 3_655
C(21) O(4) 3.3749(19) ? . .
C(21) O(4) 3.3749(19) ? . 3_655
C(22) N(8) 2.809(2) ? . 6_555
C(22) C(24) 2.399(2) ? . 6_555
C(23) O(4) 3.578(2) ? . .
C(23) O(6) 3.512(3) ? . .
C(23) O(7) 3.478(3) ? . .
C(23) N(8) 2.392(2) ? . 6_555
C(23) C(24) 2.707(2) ? . 6_555
C(24) O(7) 3.515(3) ? . 8_544
C(24) C(22) 2.399(2) ? . 6_554
C(24) C(23) 2.707(2) ? . 6_554
C(25) O(3) 3.304(4) ? . 7_545
C(25) O(4) 3.600(4) ? . .
C(25) C(20) 3.597(4) ? . 3_655
C(25) C(31) 3.580(6) ? . 5_545
C(26) O(3) 3.528(3) ? . .
C(26) O(6) 3.267(4) ? . 5_545
C(27) O(2) 3.387(4) ? . .
C(28) O(1) 3.364(4) ? . .
C(28) C(6) 3.513(4) ? . 2_555
C(29) O(4) 3.339(3) ? . .
C(29) O(7) 3.480(4) ? . .
C(30) C(5) 3.568(7) ? . .
C(31) O(5) 3.394(5) ? . .
C(31) C(25) 3.580(6) ? . 5_555
O(1) H(10) 3.290 ? . 3_655
O(1) H(22) 3.439 ? . .
O(1) H(24) 3.317 ? . .
O(1) H(26) 3.461 ? . .
O(1) H(32) 2.861 ? . 5_545
O(2) H(6) 2.870 ? . 3_555
O(2) H(7) 2.687 ? . 3_555
O(2) H(13) 3.411 ? . 7_445
O(2) H(21) 3.215 ? . .
O(2) H(26) 3.216 ? . .
O(3) H(7) 3.323 ? . 3_555
O(3) H(13) 3.133 ? . 7_445
O(3) H(14) 3.452 ? . 7_445
O(3) H(16) 3.345 ? . .
O(4) H(11) 3.241 ? . .
O(4) H(15) 3.430 ? . .
O(4) H(17) 3.165 ? . .
O(4) H(26) 3.195 ? . .
O(4) H(27) 3.476 ? . .
O(5) H(6) 2.661 ? . 3_555
O(5) H(7) 3.065 ? . 3_555
O(5) H(11) 3.484 ? . .
O(5) H(17) 3.354 ? . .
O(5) H(31) 3.266 ? . .
O(5) H(33) 3.588 ? . .
O(6) H(10) 2.671 ? . .
O(6) H(11) 2.630 ? . .
O(6) H(18) 2.842 ? . 5_555
O(6) H(26) 3.197 ? . 5_555
O(7) H(11) 2.841 ? . .
O(7) H(12) 2.906 ? . 8_545
O(7) H(18) 2.897 ? . 5_555
O(7) H(27) 3.401 ? . .
O(7) H(29) 3.502 ? . .
N(1) H(21) 3.501 ? . 4_555
N(2) H(16) 3.547 ? . 4_555
N(2) H(20) 3.210 ? . 4_555
N(2) H(21) 3.570 ? . 4_555
N(3) H(2) 2.930 ? . 4_655
N(3) H(27) 3.427 ? . 6_554
N(4) H(14) 3.529 ? . 6_455
N(6) H(31) 3.506 ? . .
N(6) H(31) 3.506 ? . 3_555
N(7) H(24) 3.229 ? . .
N(7) H(24) 3.229 ? . 3_655
N(8) H(11) 3.235 ? . 6_554
C(1) H(21) 3.166 ? . 4_555
C(1) H(23) 3.276 ? . .
C(2) H(16) 3.123 ? . 4_555
C(2) H(21) 3.391 ? . 4_555
C(2) H(23) 3.459 ? . .
C(2) H(30) 3.485 ? . .
C(3) H(16) 3.124 ? . 4_555
C(3) H(20) 3.382 ? . 4_555
C(3) H(21) 3.209 ? . 4_555
C(3) H(23) 3.543 ? . .
C(4) H(16) 3.362 ? . 4_555
C(4) H(22) 3.488 ? . 4_555
C(4) H(28) 3.308 ? . .
C(4) H(30) 3.267 ? . .
C(5) H(19) 3.442 ? . 3_555
C(5) H(22) 3.015 ? . 4_555
C(5) H(28) 3.224 ? . .
C(5) H(29) 3.346 ? . .
C(5) H(30) 3.561 ? . .
C(6) H(19) 3.434 ? . 3_555
C(6) H(22) 3.064 ? . 4_555
C(6) H(24) 3.158 ? . 4_555
C(6) H(28) 3.275 ? . .
C(7) H(15) 3.403 ? . 4_555
C(7) H(22) 3.541 ? . 4_555
C(7) H(24) 3.585 ? . 4_555
C(7) H(25) 3.562 ? . 5_555
C(7) H(28) 3.403 ? . .
C(8) H(28) 3.477 ? . .
C(8) H(33) 3.255 ? . 6_554
C(9) H(16) 3.541 ? . 4_555
C(9) H(28) 3.411 ? . .
C(9) H(33) 3.378 ? . 6_554
C(10) H(15) 3.005 ? . 6_455
C(10) H(25) 3.298 ? . 3_555
C(11) H(14) 3.362 ? . 6_455
C(11) H(15) 3.167 ? . 6_455
C(11) H(33) 3.564 ? . 3_555
C(12) H(2) 2.563 ? . 4_655
C(12) H(15) 3.316 ? . 3_655
C(12) H(25) 3.486 ? . 6_554
C(12) H(27) 3.381 ? . 6_554
C(13) H(17) 3.347 ? . 3_555
C(13) H(21) 3.508 ? . 3_555
C(14) H(17) 3.261 ? . 3_555
C(16) H(31) 3.016 ? . .
C(16) H(31) 3.016 ? . 3_555
C(17) H(13) 3.438 ? . 5_555
C(17) H(14) 3.467 ? . 5_555
C(17) H(25) 3.496 ? . 3_555
C(17) H(31) 3.234 ? . .
C(17) H(31) 3.039 ? . 3_555
C(18) H(13) 3.420 ? . 5_555
C(18) H(14) 3.280 ? . 5_555
C(18) H(25) 3.592 ? . 3_555
C(18) H(31) 3.464 ? . .
C(18) H(31) 3.273 ? . 3_555
C(19) H(15) 3.260 ? . 3_655
C(19) H(24) 3.261 ? . .
C(19) H(24) 3.347 ? . 3_655
C(19) H(30) 3.293 ? . .
C(20) H(13) 3.464 ? . 3_655
C(20) H(15) 3.231 ? . 3_655
C(20) H(24) 3.476 ? . .
C(20) H(24) 3.557 ? . 3_655
C(20) H(30) 3.028 ? . .
C(22) H(12) 3.251 ? . 6_555
C(23) H(27) 3.403 ? . .
C(24) H(27) 3.160 ? . 8_544
C(25) H(8) 3.555 ? . 5_545
C(25) H(10) 3.230 ? . 3_655
C(25) H(24) 3.521 ? . .
C(25) H(31) 3.454 ? . 5_545
C(25) H(32) 2.929 ? . 5_545
C(26) H(6) 3.242 ? . 3_555
C(26) H(21) 3.310 ? . .
C(26) H(22) 3.129 ? . .
C(26) H(26) 3.435 ? . .
C(26) H(32) 3.295 ? . 5_545
C(27) H(2) 3.376 ? . 3_555
C(27) H(16) 3.270 ? . .
C(27) H(26) 3.545 ? . 7_445
C(27) H(29) 3.146 ? . 3_555
C(28) H(2) 3.509 ? . 2_555
C(28) H(5) 3.483 ? . 3_555
C(28) H(15) 3.397 ? . .
C(28) H(17) 3.045 ? . .
C(29) H(7) 3.439 ? . 3_555
C(29) H(20) 3.533 ? . 7_545
C(29) H(28) 3.421 ? . 5_545
C(30) H(10) 2.955 ? . .
C(30) H(11) 3.523 ? . .
C(30) H(19) 3.048 ? . 3_555
C(30) H(26) 3.357 ? . 5_555
C(31) H(3) 3.508 ? . 6_555
C(31) H(14) 2.761 ? . 5_555
C(31) H(18) 3.011 ? . 5_555
H(1) H(19) 3.133 ? . 3_555
H(1) H(21) 3.299 ? . 3_555
H(1) H(22) 3.217 ? . 4_555
H(1) H(29) 3.368 ? . .
H(2) N(3) 2.930 ? . 2_565
H(2) C(12) 2.563 ? . 2_565
H(2) C(27) 3.376 ? . 3_555
H(2) C(28) 3.509 ? . 4_555
H(2) H(19) 3.125 ? . 3_555
H(2) H(20) 3.046 ? . 3_555
H(2) H(21) 3.408 ? . 3_555
H(2) H(22) 3.301 ? . 4_555
H(2) H(24) 3.004 ? . 4_555
H(3) C(31) 3.508 ? . 6_554
H(3) H(14) 3.346 ? . 4_555
H(3) H(32) 3.448 ? . 6_554
H(3) H(33) 2.775 ? . 6_554
H(4) H(16) 3.443 ? . 4_555
H(4) H(33) 3.029 ? . 6_554
H(5) C(28) 3.483 ? . 3_555
H(5) H(17) 2.867 ? . 3_555
H(5) H(22) 3.161 ? . 3_555
H(5) H(23) 2.967 ? . 3_555
H(6) O(2) 2.870 ? . 3_555
H(6) O(5) 2.661 ? . 3_555
H(6) C(26) 3.242 ? . 3_555
H(6) H(17) 2.697 ? . 3_555
H(6) H(31) 3.591 ? . 3_555
H(7) O(2) 2.687 ? . 3_555
H(7) O(3) 3.323 ? . 3_555
H(7) O(5) 3.065 ? . 3_555
H(7) C(29) 3.439 ? . 3_555
H(7) H(13) 3.105 ? . 5_555
H(7) H(14) 3.526 ? . 5_555
H(7) H(25) 2.986 ? . 3_555
H(7) H(31) 3.436 ? . 3_555
H(8) C(25) 3.555 ? . 5_555
H(8) H(13) 3.065 ? . 5_555
H(8) H(14) 3.215 ? . 5_555
H(8) H(25) 3.139 ? . 3_555
H(9) H(15) 3.105 ? . 3_655
H(9) H(30) 2.961 ? . .
H(10) O(1) 3.290 ? . 3_655
H(10) O(6) 2.671 ? . .
H(10) C(25) 3.230 ? . 3_655
H(10) C(30) 2.955 ? . .
H(10) H(13) 2.880 ? . 3_655
H(10) H(15) 3.072 ? . 3_655
H(10) H(28) 3.273 ? . .
H(10) H(30) 2.470 ? . .
H(11) O(4) 3.241 ? . .
H(11) O(5) 3.484 ? . .
H(11) O(6) 2.630 ? . .
H(11) O(7) 2.841 ? . .
H(11) N(8) 3.235 ? . 6_555
H(11) C(30) 3.523 ? . .
H(11) H(27) 3.508 ? . .
H(11) H(30) 3.358 ? . .
H(12) O(7) 2.906 ? . 8_544
H(12) C(22) 3.251 ? . 6_554
H(12) H(16) 3.254 ? . 2_655
H(12) H(27) 3.093 ? . 8_544
H(12) H(33) 3.502 ? . 8_544
H(13) O(2) 3.411 ? . 7_545
H(13) O(3) 3.133 ? . 7_545
H(13) C(17) 3.438 ? . 5_545
H(13) C(18) 3.420 ? . 5_545
H(13) C(20) 3.464 ? . 3_655
H(13) H(7) 3.105 ? . 5_545
H(13) H(8) 3.065 ? . 5_545
H(13) H(10) 2.880 ? . 3_655
H(14) O(3) 3.452 ? . 7_545
H(14) N(4) 3.529 ? . 6_544
H(14) C(11) 3.362 ? . 6_544
H(14) C(17) 3.467 ? . 5_545
H(14) C(18) 3.280 ? . 5_545
H(14) C(31) 2.761 ? . 5_545
H(14) H(3) 3.346 ? . 2_555
H(14) H(7) 3.526 ? . 5_545
H(14) H(8) 3.215 ? . 5_545
H(14) H(31) 2.628 ? . 5_545
H(14) H(32) 2.240 ? . 5_545
H(14) H(33) 3.000 ? . 5_545
H(15) O(4) 3.430 ? . .
H(15) C(7) 3.403 ? . 2_555
H(15) C(10) 3.005 ? . 6_544
H(15) C(11) 3.167 ? . 6_544
H(15) C(12) 3.316 ? . 3_655
H(15) C(19) 3.260 ? . 3_655
H(15) C(20) 3.231 ? . 3_655
H(15) C(28) 3.397 ? . .
H(15) H(9) 3.105 ? . 3_655
H(15) H(10) 3.072 ? . 3_655
H(15) H(22) 3.452 ? . .
H(15) H(24) 2.870 ? . .
H(15) H(32) 3.451 ? . 5_545
H(16) O(3) 3.345 ? . .
H(16) N(2) 3.547 ? . 2_555
H(16) C(2) 3.123 ? . 2_555
H(16) C(3) 3.124 ? . 2_555
H(16) C(4) 3.362 ? . 2_555
H(16) C(9) 3.541 ? . 2_555
H(16) C(27) 3.270 ? . .
H(16) H(4) 3.443 ? . 2_555
H(16) H(12) 3.254 ? . 4_545
H(16) H(20) 3.260 ? . .
H(16) H(21) 2.771 ? . .
H(16) H(22) 3.514 ? . .
H(16) H(32) 3.527 ? . 5_545
H(17) O(4) 3.165 ? . .
H(17) O(5) 3.354 ? . .
H(17) C(13) 3.347 ? . 3_555
H(17) C(14) 3.261 ? . 3_555
H(17) C(28) 3.045 ? . .
H(17) H(5) 2.867 ? . 3_555
H(17) H(6) 2.697 ? . 3_555
H(17) H(21) 3.479 ? . .
H(17) H(22) 2.346 ? . .
H(17) H(23) 3.345 ? . .
H(17) H(26) 3.444 ? . .
H(18) O(6) 2.842 ? . 5_545
H(18) O(7) 2.897 ? . 5_545
H(18) C(31) 3.011 ? . 5_545
H(18) H(22) 3.179 ? . .
H(18) H(26) 3.090 ? . .
H(18) H(32) 2.401 ? . 5_545
H(18) H(33) 3.389 ? . 5_545
H(19) C(5) 3.442 ? . 3_555
H(19) C(6) 3.434 ? . 3_555
H(19) C(30) 3.048 ? . 3_555
H(19) H(1) 3.133 ? . 3_555
H(19) H(2) 3.125 ? . 3_555
H(19) H(26) 3.144 ? . 7_445
H(19) H(27) 3.481 ? . 7_445
H(19) H(28) 3.151 ? . 3_555
H(19) H(29) 2.210 ? . 3_555
H(20) N(2) 3.210 ? . 2_555
H(20) C(3) 3.382 ? . 2_555
H(20) C(29) 3.533 ? . 7_445
H(20) H(2) 3.046 ? . 3_555
H(20) H(16) 3.260 ? . .
H(20) H(26) 3.265 ? . 7_445
H(20) H(27) 2.957 ? . 7_445
H(21) O(2) 3.215 ? . .
H(21) N(1) 3.501 ? . 2_555
H(21) N(2) 3.570 ? . 2_555
H(21) C(1) 3.166 ? . 2_555
H(21) C(2) 3.391 ? . 2_555
H(21) C(3) 3.209 ? . 2_555
H(21) C(13) 3.508 ? . 3_555
H(21) C(26) 3.310 ? . .
H(21) H(1) 3.299 ? . 3_555
H(21) H(2) 3.408 ? . 3_555
H(21) H(16) 2.771 ? . .
H(21) H(17) 3.479 ? . .
H(22) O(1) 3.439 ? . .
H(22) C(4) 3.488 ? . 2_555
H(22) C(5) 3.015 ? . 2_555
H(22) C(6) 3.064 ? . 2_555
H(22) C(7) 3.541 ? . 2_555
H(22) C(26) 3.129 ? . .
H(22) H(1) 3.217 ? . 2_555
H(22) H(2) 3.301 ? . 2_555
H(22) H(5) 3.161 ? . 3_555
H(22) H(15) 3.452 ? . .
H(22) H(16) 3.514 ? . .
H(22) H(17) 2.346 ? . .
H(22) H(18) 3.179 ? . .
H(23) C(1) 3.276 ? . .
H(23) C(2) 3.459 ? . .
H(23) C(3) 3.543 ? . .
H(23) H(5) 2.967 ? . 3_555
H(23) H(17) 3.345 ? . .
H(23) H(30) 2.958 ? . .
H(24) O(1) 3.317 ? . .
H(24) N(7) 3.229 ? . .
H(24) C(6) 3.158 ? . 2_555
H(24) C(7) 3.585 ? . 2_555
H(24) C(19) 3.261 ? . .
H(24) C(19) 3.347 ? . 3_655
H(24) C(20) 3.476 ? . .
H(24) C(20) 3.557 ? . 3_655
H(24) C(25) 3.521 ? . .
H(24) H(2) 3.004 ? . 2_555
H(24) H(15) 2.870 ? . .
H(25) C(7) 3.562 ? . 5_545
H(25) C(10) 3.298 ? . 3_555
H(25) C(12) 3.486 ? . 6_555
H(25) C(17) 3.496 ? . 3_555
H(25) C(18) 3.592 ? . 3_555
H(25) H(7) 2.986 ? . 3_555
H(25) H(8) 3.139 ? . 3_555
H(25) H(28) 2.977 ? . 5_545
H(26) O(1) 3.461 ? . .
H(26) O(2) 3.216 ? . .
H(26) O(4) 3.195 ? . .
H(26) O(6) 3.197 ? . 5_545
H(26) C(26) 3.435 ? . .
H(26) C(27) 3.545 ? . 7_545
H(26) C(30) 3.357 ? . 5_545
H(26) H(17) 3.444 ? . .
H(26) H(18) 3.090 ? . .
H(26) H(19) 3.144 ? . 7_545
H(26) H(20) 3.265 ? . 7_545
H(26) H(28) 3.005 ? . 5_545
H(26) H(29) 3.296 ? . 5_545
H(27) O(4) 3.476 ? . .
H(27) O(7) 3.401 ? . .
H(27) N(3) 3.427 ? . 6_555
H(27) C(12) 3.381 ? . 6_555
H(27) C(23) 3.403 ? . .
H(27) C(24) 3.160 ? . 8_545
H(27) H(11) 3.508 ? . .
H(27) H(12) 3.093 ? . 8_545
H(27) H(19) 3.481 ? . 7_545
H(27) H(20) 2.957 ? . 7_545
H(28) C(4) 3.308 ? . .
H(28) C(5) 3.224 ? . .
H(28) C(6) 3.275 ? . .
H(28) C(7) 3.403 ? . .
H(28) C(8) 3.477 ? . .
H(28) C(9) 3.411 ? . .
H(28) C(29) 3.421 ? . 5_555
H(28) H(10) 3.273 ? . .
H(28) H(19) 3.151 ? . 3_555
H(28) H(25) 2.977 ? . 5_555
H(28) H(26) 3.005 ? . 5_555
H(29) O(7) 3.502 ? . .
H(29) C(5) 3.346 ? . .
H(29) C(27) 3.146 ? . 3_555
H(29) H(1) 3.368 ? . .
H(29) H(19) 2.210 ? . 3_555
H(29) H(26) 3.296 ? . 5_555
H(30) C(2) 3.485 ? . .
H(30) C(4) 3.267 ? . .
H(30) C(5) 3.561 ? . .
H(30) C(19) 3.293 ? . .
H(30) C(20) 3.028 ? . .
H(30) H(9) 2.961 ? . .
H(30) H(10) 2.470 ? . .
H(30) H(11) 3.358 ? . .
H(30) H(23) 2.958 ? . .
H(31) O(5) 3.266 ? . .
H(31) N(6) 3.506 ? . .
H(31) C(16) 3.016 ? . .
H(31) C(17) 3.234 ? . .
H(31) C(17) 3.039 ? . 3_555
H(31) C(18) 3.464 ? . .
H(31) C(18) 3.273 ? . 3_555
H(31) C(25) 3.454 ? . 5_555
H(31) H(6) 3.591 ? . 3_555
H(31) H(7) 3.436 ? . 3_555
H(31) H(14) 2.628 ? . 5_555
H(32) O(1) 2.861 ? . 5_555
H(32) C(25) 2.929 ? . 5_555
H(32) C(26) 3.295 ? . 5_555
H(32) H(3) 3.448 ? . 6_555
H(32) H(14) 2.240 ? . 5_555
H(32) H(15) 3.451 ? . 5_555
H(32) H(16) 3.527 ? . 5_555
H(32) H(18) 2.401 ? . 5_555
H(33) O(5) 3.588 ? . .
H(33) C(8) 3.255 ? . 6_555
H(33) C(9) 3.378 ? . 6_555
H(33) C(11) 3.564 ? . 3_555
H(33) H(3) 2.775 ? . 6_555
H(33) H(4) 3.029 ? . 6_555
H(33) H(12) 3.502 ? . 8_545
H(33) H(14) 3.000 ? . 5_555
H(33) H(18) 3.389 ? . 5_555


#==============================================================================

#===END

data_General
_audit_creation_date                  '2010-07-10'
_audit_creation_method                'by CrystalStructure 3.8'
_audit_update_record                   ?

#==============================================================================

# PROCESSING SUMMARY (IUCr Office Use Only)

_journal_date_recd_electronic     ?
_journal_date_from_coeditor       ?
_journal_date_accepted            ?
_journal_coeditor_code            ?

#==============================================================================

# SUBMISSION DETAILS

_publ_contact_author_name             'Susumu Kitagawa'
_publ_contact_author_address          
;                                      Department of Synthetic Chemistry 
                                       and Biological Chemistry, 
                                       Graduate School of Engineering, 
                                       Kyoto University, 
                                       Katsura, Kyoto 615-8510, Japan 
;
_publ_contact_author_email            'kitagawa@sbchem.kyoto-u.ac.jp'
_publ_contact_author_fax              '+81-75-383-2732'
_publ_contact_author_phone            '+81-75-383-2733'
_publ_contact_letter
;
    ENTER TEXT OF LETTER
;
_publ_requested_journal               'ENTER JOURNAL NAME HERE'
_publ_requested_category              'CHOOSE FI FM FO CI CM CO or AD'
_publ_requested_coeditor_name          ?

#==============================================================================

# TITLE AND AUTHOR LIST

_publ_section_title
;
  Synthesis of TCNQ-based porous coordination polymers with several metal ions  
  and guest dependent properties
;
_publ_section_title_footnote
;
    ENTER FOOTNOTE TO TITLE OF PAPER
;
loop_
_publ_author_name
_publ_author_footnote
_publ_author_address
' Satoru Shimomura '
;
  FIRST AUTHORS FOOTNOTES
;
; Department of Synthetic Chemistry and Biological Chemistry, 
  Graduate School of Engineering, 
  Kyoto University, 
  Katsura, Kyoto 615-8510, Japan
;
_publ_section_synopsis
;
  ENTER SYNOPSIS
;

#==============================================================================

# TEXT

_publ_section_abstract
;
    ENTER ABSTRACT
;
_publ_section_comment
;
    ENTER TEXT
;
_publ_section_references
;
    ENTER OTHER REFERENCES

    Rigaku Americas and Rigaku Corporation. (2007).
    CrystalStructure (Version 3.8). 
    Single Crystal Structure Analysis Software.
    Rigaku Americas, 9009 TX, USA 77381-5209.
    Rigaku, Tokyo 196-8666, Japan.

    Burla, M.C., Camalli, M., Carrozzini, B., Cascarano, G.L., 
    Giacovazzo, C., Polidori, G., Spagna., R. 
    (2003). 
    SIR2002

    Carruthers, J.R., Rollett,J.S., Betteridge, P.W.,
	 Kinna, D., Pearce, L., Larsen, A., and Gabe, E.(1999)
    CRYSTALS Issue 11, Chemical Crystallography Laboratory, Oxford, UK.

    Carruthers, J.R. and Watkin, D.J. (1979), Acta Cryst, A35, 698-699

;
_publ_section_figure_captions
;
    ENTER FIGURE CAPTIONS
;
_publ_section_exptl_prep
;
    ENTER COMPOUND PREPARATION DETAILS
;
_publ_section_exptl_refinement
;
    ENTER SPECIAL DETAILS OF THE REFINEMENT
;

#==============================================================================

data___091112_CoTb_as_1

#==============================================================================

# CHEMICAL DATA

_chemical_formula_sum                  'C30 Co N6 O8 '
_chemical_formula_moiety               'C30 Co N6 O8 '
_chemical_formula_weight               631.30
_chemical_melting_point                ?

#==============================================================================

# CRYSTAL DATA
_symmetry_cell_setting                 tetragonal
_symmetry_space_group_name_H-M        'P 4/n c c'
_symmetry_space_group_name_Hall       '-P 4a 2ac'
_symmetry_Int_Tables_number            130
loop_
_symmetry_equiv_pos_site_id
_symmetry_equiv_pos_as_xyz
1   '+X,+Y,+Z'
2   '1/2-Y,+X,+Z'
3   '1/2-X,1/2-Y,+Z'
4   '+Y,1/2-X,+Z'
5   '1/2-X,+Y,1/2+Z'
6   '+Y,+X,1/2+Z'
7   '+X,1/2-Y,1/2+Z'
8   '1/2-Y,1/2-X,1/2+Z'
9   '-X,-Y,-Z'
10  '1/2+Y,-X,-Z'
11  '1/2+X,1/2+Y,-Z'
12  '-Y,1/2+X,-Z'
13  '1/2+X,-Y,1/2-Z'
14  '-Y,-X,1/2-Z'
15  '-X,1/2+Y,1/2-Z'
16  '1/2+Y,1/2+X,1/2-Z'

#------------------------------------------------------------------------------

_cell_length_a                         17.302(8)
_cell_length_b                         17.302(8)
_cell_length_c                         22.789(11)
_cell_angle_alpha                      90.0000
_cell_angle_beta                       90.0000
_cell_angle_gamma                      90.0000
_cell_volume                           6822(6)
_cell_formula_units_Z                  8
_cell_measurement_reflns_used          10506
_cell_measurement_theta_min            1.7
_cell_measurement_theta_max            29.9
_cell_measurement_temperature          223.1

#------------------------------------------------------------------------------

_exptl_crystal_description            'prism'
_exptl_crystal_colour                 'colorless'
_exptl_crystal_size_max                0.20
_exptl_crystal_size_mid                0.20
_exptl_crystal_size_min                0.20
_exptl_crystal_density_diffrn          1.229
_exptl_crystal_density_meas            ?
_exptl_crystal_density_method         'not measured'
_exptl_crystal_F_000                   2504.00
_exptl_absorpt_coefficient_mu          0.555
_exptl_absorpt_correction_type         multi-scan
_exptl_absorpt_process_details         
'Jacobson, R. (1998) Private communication'
_exptl_absorpt_correction_T_min        0.569
_exptl_absorpt_correction_T_max        0.895

#==============================================================================

# EXPERIMENTAL DATA

_diffrn_radiation_type                'Mo K\a'
_diffrn_radiation_wavelength           0.71070
_diffrn_measurement_device_type       'Rigaku Mercury'
_diffrn_measurement_method             \w
_diffrn_detector_area_resol_mean       7.31
_diffrn_reflns_number                  23406
_diffrn_reflns_av_R_equivalents        0.128
_diffrn_reflns_theta_max               25.04
_diffrn_measured_fraction_theta_max    0.995
_diffrn_reflns_theta_full              25.04
_diffrn_measured_fraction_theta_full   0.995
_diffrn_reflns_limit_h_min             -20
_diffrn_reflns_limit_h_max             20
_diffrn_reflns_limit_k_min             -19
_diffrn_reflns_limit_k_max             20
_diffrn_reflns_limit_l_min             -13
_diffrn_reflns_limit_l_max             27
_diffrn_ambient_temperature            223.1

#==============================================================================

# REFINEMENT DATA

_refine_special_details
;
    Refinement was performed using reflections with F^2^ > 0.9 sigma(F^2^).
    The weighted R-factor(wR), goodness of fit (S) and R-factor (gt) are 
    based on F, with F set to zero for negative F. The threshold expression of
    F^2^ > 2.0 sigma(F^2^) is used only for calculating R-factor (gt).
;
_reflns_number_total                   3015
_reflns_number_gt                      1128
_reflns_threshold_expression           F^2^>2.0\s(F^2^)
_refine_ls_structure_factor_coef       F
_refine_ls_R_factor_gt                 0.0869
_refine_ls_wR_factor_ref               0.1209
_refine_ls_hydrogen_treatment          ?
_refine_ls_number_reflns               1895
_refine_ls_number_parameters           186
_refine_ls_goodness_of_fit_ref         1.059
_refine_ls_weighting_scheme            calc
_refine_ls_weighting_details
;
    Chebychev polynomial with 3 parameters (Carruthers & Watkin, 1979)
    13.6593    6.1239    9.9787
;
_refine_ls_shift/su_max                0.0000
_refine_diff_density_max               0.84
_refine_diff_density_min               -0.81
_refine_ls_extinction_method           none
_refine_ls_extinction_coef             ?

loop_
_atom_type_symbol
_atom_type_description
_atom_type_scat_dispersion_real
_atom_type_scat_dispersion_imag
_atom_type_scat_source
  'C' 'C'  0.003 0.002 
;
International Tables for Crystallography
(1992, Vol. C, Tables 4.2.6.8 and 6.1.1.4)
;
  'N' 'N'  0.006 0.003 
;
International Tables for Crystallography
(1992, Vol. C, Tables 4.2.6.8 and 6.1.1.4)
;
  'O' 'O'  0.011 0.006 
;
International Tables for Crystallography
(1992, Vol. C, Tables 4.2.6.8 and 6.1.1.4)
;
  'Co' 'Co'  0.349 0.972 
;
International Tables for Crystallography
(1992, Vol. C, Tables 4.2.6.8 and 6.1.1.4)
;

#==============================================================================

# ATOMIC COORDINATES AND THERMAL PARAMETERS

loop_
_atom_site_label
_atom_site_type_symbol
_atom_site_fract_x
_atom_site_fract_y
_atom_site_fract_z
_atom_site_U_iso_or_equiv
_atom_site_adp_type
_atom_site_occupancy
_atom_site_symmetry_multiplicity
_atom_site_calc_flag
_atom_site_refinement_flags
_atom_site_disorder_assembly
_atom_site_disorder_group
 Co(1) Co 0.2500 0.2500 0.46161(6) 0.0288(3) Uani 1.00 4 d S . .
 Co(2) Co 0.7500 0.2500 0.5000 0.0275(3) Uani 1.00 4 d S . .
 O(1) O 0.4797(14) 0.6868(15) 0.2065(13) 0.319(11) Uiso 1.00 1 d . . .
 O(2) O 0.344(2) 0.478(2) 0.1940(18) 0.417(16) Uiso 1.00 1 d . . .
 O(3) O 0.4819(11) 0.8453(13) 0.2250(10) 0.269(8) Uiso 1.00 1 d . . .
 O(4) O 0.4411(15) 0.3402(16) 0.1816(15) 0.369(13) Uiso 1.00 1 d . . .
 N(1) N 0.3717(2) 0.2708(2) 0.4628(2) 0.0397(14) Uani 1.00 1 d . . .
 N(2) N 0.6282(2) 0.2661(2) 0.4992(2) 0.0351(13) Uani 1.00 1 d . . .
 N(3) N 0.2500 0.2500 0.5542(4) 0.0291(16) Uani 1.00 4 d S . .
 N(4) N 0.2500 0.2500 0.3684(4) 0.0366(18) Uani 1.00 4 d S . .
 N(5) N 0.7500 0.2500 0.4071(3) 0.0330(16) Uani 1.00 2 d S . .
 C(1) C 0.4310(3) 0.2960(3) 0.4722(2) 0.0354(16) Uani 1.00 1 d . . .
 C(2) C 0.4991(3) 0.3345(3) 0.4851(3) 0.0409(16) Uani 1.00 1 d . . .
 C(3) C 0.5690(3) 0.2933(3) 0.4927(2) 0.0356(16) Uani 1.00 1 d . . .
 C(4) C 0.5001(3) 0.4190(3) 0.4935(2) 0.0384(16) Uani 1.00 1 d . . .
 C(5) C 0.4333(3) 0.4624(4) 0.4842(3) 0.052(2) Uani 1.00 1 d . . .
 C(6) C 0.4336(3) 0.5418(3) 0.4913(3) 0.050(2) Uani 1.00 1 d . . .
 C(7) C 0.3058(9) 0.2152(10) 0.5862(5) 0.059(4) Uani 0.50 1 d P . .
 C(8) C 0.3082(9) 0.2139(10) 0.6471(6) 0.066(4) Uani 0.50 1 d P . .
 C(9) C 0.2500 0.2500 0.6805(4) 0.038(2) Uani 1.00 4 d S . .
 C(10) C 0.2500 0.2500 0.7446(5) 0.041(2) Uani 1.00 4 d S . .
 C(11) C 0.2150(11) 0.3091(11) 0.7768(5) 0.077(5) Uani 0.50 1 d P . .
 C(12) C 0.3057(9) 0.2161(11) 0.3367(5) 0.066(4) Uani 0.50 1 d P . .
 C(13) C 0.7177(4) 0.3073(4) 0.3752(3) 0.054(2) Uani 1.00 1 d . . .
 C(14) C 0.7168(5) 0.3095(4) 0.3149(3) 0.059(2) Uani 1.00 1 d . . .
 C(15) C 0.7500 0.2500 0.2827(4) 0.045(2) Uani 1.00 2 d S . .
 C(16) C 0.465(2) 0.674(2) 0.1471(19) 0.318(17) Uiso 1.00 1 d . . .
 C(17) C 0.316(3) 0.507(2) 0.138(2) 0.44(3) Uiso 1.00 1 d . . .
 C(18) C 0.4999(14) 0.8927(18) 0.1791(13) 0.244(11) Uiso 1.00 1 d . . .
 C(19) C 0.454(2) 0.317(2) 0.115(2) 0.336(18) Uiso 1.00 1 d . . .


loop_
_atom_site_aniso_label
_atom_site_aniso_U_11
_atom_site_aniso_U_22
_atom_site_aniso_U_33
_atom_site_aniso_U_12
_atom_site_aniso_U_13
_atom_site_aniso_U_23
 Co(1) 0.0242(5) 0.0242(5) 0.0382(8) 0.0000 0.0000 0.0000
 Co(2) 0.0227(5) 0.0227(5) 0.0371(8) 0.0000 0.0000 0.0000
 N(1) 0.024(2) 0.042(2) 0.053(3) 0.004(2) -0.004(2) -0.003(2)
 N(2) 0.023(2) 0.030(2) 0.052(2) 0.004(2) -0.003(2) 0.0015(19)
 N(3) 0.017(2) 0.017(2) 0.052(5) 0.0000 0.0000 0.0000
 N(4) 0.037(3) 0.037(3) 0.036(4) 0.0000 0.0000 0.0000
 N(5) 0.022(2) 0.019(2) 0.058(4) 0.001(2) 0.0000 0.0000
 C(1) 0.026(3) 0.029(3) 0.052(3) 0.001(2) 0.002(2) -0.000(2)
 C(2) 0.030(2) 0.025(2) 0.068(4) -0.001(2) 0.000(2) 0.004(2)
 C(3) 0.028(3) 0.032(3) 0.047(3) -0.007(2) 0.002(2) -0.008(2)
 C(4) 0.028(2) 0.030(2) 0.057(3) -0.006(2) -0.003(2) 0.001(2)
 C(5) 0.032(3) 0.046(3) 0.078(4) -0.002(3) -0.005(3) -0.010(3)
 C(6) 0.026(3) 0.027(3) 0.098(6) 0.005(2) -0.012(3) 0.001(3)
 C(7) 0.073(10) 0.074(9) 0.031(6) 0.016(8) -0.020(6) 0.001(6)
 C(8) 0.070(10) 0.082(10) 0.046(7) 0.044(8) -0.013(7) -0.005(7)
 C(9) 0.040(3) 0.040(3) 0.032(5) 0.0000 0.0000 0.0000
 C(10) 0.039(4) 0.039(4) 0.045(6) 0.0000 0.0000 0.0000
 C(11) 0.099(12) 0.103(14) 0.028(6) 0.066(10) -0.007(7) -0.017(7)
 C(12) 0.065(10) 0.100(11) 0.033(6) 0.063(8) 0.002(6) 0.007(7)
 C(13) 0.063(4) 0.043(3) 0.055(4) 0.017(3) 0.006(3) 0.002(3)
 C(14) 0.077(5) 0.046(4) 0.054(4) 0.012(3) -0.002(3) 0.001(3)
 C(15) 0.046(5) 0.037(4) 0.052(5) 0.009(4) 0.0000 0.0000

#==============================================================================

_computing_data_collection            'CrystalClear'
_computing_cell_refinement            'CrystalClear'
_computing_data_reduction             'CrystalStructure'
_computing_structure_solution         'SIR2002'
_computing_structure_refinement       'CRYSTALS'
_computing_publication_material       'CrystalStructure 3.8'
_computing_molecular_graphics          ?

#==============================================================================

# MOLECULAR GEOMETRY

_geom_special_details
;
    ENTER SPECIAL DETAILS OF THE MOLECULAR GEOMETRY
;

loop_
_geom_bond_atom_site_label_1
_geom_bond_atom_site_label_2
_geom_bond_distance
_geom_bond_publ_flag
_geom_bond_site_symmetry_1
_geom_bond_site_symmetry_2
Co(1) N(1) 2.136(5) yes . .
Co(1) N(1) 2.136(5) yes . 2_555
Co(1) N(1) 2.136(5) yes . 3_555
Co(1) N(1) 2.136(5) yes . 4_555
Co(1) N(3) 2.111(10) yes . .
Co(1) N(4) 2.124(9) yes . .
Co(2) N(2) 2.126(4) yes . .
Co(2) N(2) 2.126(4) yes . 3_655
Co(2) N(2) 2.126(4) yes . 10_566
Co(2) N(2) 2.126(4) yes . 12_646
Co(2) N(5) 2.116(7) yes . .
Co(2) N(5) 2.116(7) yes . 10_566
O(1) C(16) 1.39(5) yes . .
O(2) C(17) 1.45(7) yes . .
O(3) C(18) 1.37(3) yes . .
O(4) C(19) 1.58(5) yes . .
N(1) C(1) 1.135(7) yes . .
N(2) C(3) 1.137(7) yes . .
N(3) C(7) 1.351(16) yes . .
N(3) C(7) 1.351(16) yes . 2_555
N(3) C(7) 1.351(16) yes . 3_555
N(3) C(7) 1.351(16) yes . 4_555
N(4) C(12) 1.339(16) yes . .
N(4) C(12) 1.339(17) yes . 2_555
N(4) C(12) 1.339(16) yes . 3_555
N(4) C(12) 1.339(17) yes . 4_555
N(5) C(13) 1.349(8) yes . .
N(5) C(13) 1.349(8) yes . 3_655
C(1) C(2) 1.384(8) yes . .
C(2) C(3) 1.414(8) yes . .
C(2) C(4) 1.475(8) yes . .
C(4) C(5) 1.396(8) yes . .
C(4) C(6) 1.376(8) yes . 9_666
C(5) C(6) 1.383(9) yes . .
C(7) C(7) 1.61(2) yes . 2_555
C(7) C(7) 1.61(2) yes . 4_555
C(7) C(8) 1.388(19) yes . .
C(8) C(8) 1.68(2) yes . 2_555
C(8) C(8) 1.68(2) yes . 4_555
C(8) C(9) 1.409(17) yes . .
C(9) C(10) 1.461(16) yes . .
C(10) C(11) 1.397(19) yes . .
C(10) C(11) 1.397(19) yes . 2_555
C(10) C(11) 1.397(19) yes . 3_555
C(10) C(11) 1.397(19) yes . 4_555
C(11) C(11) 1.68(2) yes . 2_555
C(11) C(11) 1.68(2) yes . 4_555
C(11) C(12) 1.368(18) yes . 6_555
C(12) C(12) 1.60(2) yes . 2_555
C(12) C(12) 1.60(2) yes . 4_555
C(13) C(14) 1.375(10) yes . .
C(14) C(15) 1.388(9) yes . .
C(15) C(15) 1.491(13) yes . 14_665

loop_
_geom_angle_atom_site_label_1
_geom_angle_atom_site_label_2
_geom_angle_atom_site_label_3
_geom_angle
_geom_angle_publ_flag
_geom_angle_site_symmetry_1
_geom_angle_site_symmetry_2
_geom_angle_site_symmetry_3
N(1) Co(1) N(1) 89.99(19) yes . . 2_555
N(1) Co(1) N(1) 178.6(2) yes . . 3_555
N(1) Co(1) N(1) 89.99(19) yes . . 4_555
N(1) Co(1) N(3) 89.29(13) yes . . .
N(1) Co(1) N(4) 90.71(13) yes . . .
N(1) Co(1) N(1) 89.99(19) yes 2_555 . 3_555
N(1) Co(1) N(1) 178.6(2) yes 2_555 . 4_555
N(1) Co(1) N(3) 89.29(13) yes 2_555 . .
N(1) Co(1) N(4) 90.71(13) yes 2_555 . .
N(1) Co(1) N(1) 89.99(19) yes 3_555 . 4_555
N(1) Co(1) N(3) 89.29(13) yes 3_555 . .
N(1) Co(1) N(4) 90.71(13) yes 3_555 . .
N(1) Co(1) N(3) 89.29(13) yes 4_555 . .
N(1) Co(1) N(4) 90.71(13) yes 4_555 . .
N(3) Co(1) N(4) 180.0000 yes . . .
N(2) Co(2) N(2) 179.01(18) yes . . 3_655
N(2) Co(2) N(2) 90.00(17) yes . . 10_566
N(2) Co(2) N(2) 90.00(17) yes . . 12_646
N(2) Co(2) N(5) 89.50(12) yes . . .
N(2) Co(2) N(5) 90.50(12) yes . . 10_566
N(2) Co(2) N(2) 90.00(17) yes 3_655 . 10_566
N(2) Co(2) N(2) 90.00(17) yes 3_655 . 12_646
N(2) Co(2) N(5) 89.50(12) yes 3_655 . .
N(2) Co(2) N(5) 90.50(12) yes 3_655 . 10_566
N(2) Co(2) N(2) 179.01(18) yes 10_566 . 12_646
N(2) Co(2) N(5) 90.50(12) yes 10_566 . .
N(2) Co(2) N(5) 89.50(12) yes 10_566 . 10_566
N(2) Co(2) N(5) 90.50(12) yes 12_646 . .
N(2) Co(2) N(5) 89.50(12) yes 12_646 . 10_566
N(5) Co(2) N(5) 180.0000 yes . . 10_566
Co(1) N(1) C(1) 163.3(4) yes . . .
Co(2) N(2) C(3) 161.5(4) yes . . .
Co(1) N(3) C(7) 122.7(6) yes . . .
Co(1) N(3) C(7) 122.7(6) yes . . 2_555
Co(1) N(3) C(7) 122.7(6) yes . . 3_555
Co(1) N(3) C(7) 122.7(6) yes . . 4_555
C(7) N(3) C(7) 73.1(10) yes . . 2_555
C(7) N(3) C(7) 114.7(10) yes . . 3_555
C(7) N(3) C(7) 73.1(10) yes . . 4_555
C(7) N(3) C(7) 73.1(10) yes 2_555 . 3_555
C(7) N(3) C(7) 114.7(11) yes 2_555 . 4_555
C(7) N(3) C(7) 73.1(10) yes 3_555 . 4_555
Co(1) N(4) C(12) 122.6(6) yes . . .
Co(1) N(4) C(12) 122.6(7) yes . . 2_555
Co(1) N(4) C(12) 122.6(6) yes . . 3_555
Co(1) N(4) C(12) 122.6(7) yes . . 4_555
C(12) N(4) C(12) 73.1(11) yes . . 2_555
C(12) N(4) C(12) 114.8(10) yes . . 3_555
C(12) N(4) C(12) 73.1(10) yes . . 4_555
C(12) N(4) C(12) 73.1(10) yes 2_555 . 3_555
C(12) N(4) C(12) 114.8(11) yes 2_555 . 4_555
C(12) N(4) C(12) 73.1(11) yes 3_555 . 4_555
Co(2) N(5) C(13) 122.6(4) yes . . .
Co(2) N(5) C(13) 122.6(4) yes . . 3_655
C(13) N(5) C(13) 114.9(7) yes . . 3_655
N(1) C(1) C(2) 173.6(6) yes . . .
C(1) C(2) C(3) 120.8(5) yes . . .
C(1) C(2) C(4) 120.9(5) yes . . .
C(3) C(2) C(4) 118.2(5) yes . . .
N(2) C(3) C(2) 174.2(6) yes . . .
C(2) C(4) C(5) 120.2(5) yes . . .
C(2) C(4) C(6) 122.1(5) yes . . 9_666
C(5) C(4) C(6) 117.6(5) yes . . 9_666
C(4) C(5) C(6) 120.8(6) yes . . .
C(4) C(6) C(5) 121.6(5) yes 9_666 . .
N(3) C(7) C(7) 53.5(8) yes . . 2_555
N(3) C(7) C(7) 53.5(8) yes . . 4_555
N(3) C(7) C(8) 124.6(13) yes . . .
C(7) C(7) C(7) 90.0(11) yes 2_555 . 4_555
C(7) C(7) C(8) 91.3(12) yes 2_555 . .
C(7) C(7) C(8) 91.5(11) yes 4_555 . .
C(7) C(8) C(8) 88.7(12) yes . . 2_555
C(7) C(8) C(8) 88.5(11) yes . . 4_555
C(7) C(8) C(9) 120.7(14) yes . . .
C(8) C(8) C(8) 90.0(11) yes 2_555 . 4_555
C(8) C(8) C(9) 53.5(8) yes 2_555 . .
C(8) C(8) C(9) 53.5(8) yes 4_555 . .
C(8) C(9) C(8) 73.0(10) yes . . 2_555
C(8) C(9) C(8) 114.6(11) yes . . 3_555
C(8) C(9) C(8) 73.0(10) yes . . 4_555
C(8) C(9) C(10) 122.7(7) yes . . .
C(8) C(9) C(8) 73.0(10) yes 2_555 . 3_555
C(8) C(9) C(8) 114.6(11) yes 2_555 . 4_555
C(8) C(9) C(10) 122.7(7) yes 2_555 . .
C(8) C(9) C(8) 73.0(10) yes 3_555 . 4_555
C(8) C(9) C(10) 122.7(7) yes 3_555 . .
C(8) C(9) C(10) 122.7(7) yes 4_555 . .
C(9) C(10) C(11) 121.6(7) yes . . .
C(9) C(10) C(11) 121.6(7) yes . . 2_555
C(9) C(10) C(11) 121.6(7) yes . . 3_555
C(9) C(10) C(11) 121.6(7) yes . . 4_555
C(11) C(10) C(11) 74.0(11) yes . . 2_555
C(11) C(10) C(11) 116.7(12) yes . . 3_555
C(11) C(10) C(11) 74.0(11) yes . . 4_555
C(11) C(10) C(11) 74.0(11) yes 2_555 . 3_555
C(11) C(10) C(11) 116.7(12) yes 2_555 . 4_555
C(11) C(10) C(11) 74.0(11) yes 3_555 . 4_555
C(10) C(11) C(11) 53.0(9) yes . . 2_555
C(10) C(11) C(11) 53.0(9) yes . . 4_555
C(10) C(11) C(12) 119.1(15) yes . . 6_555
C(11) C(11) C(11) 90.0(13) yes 2_555 . 4_555
C(11) C(11) C(12) 87.7(13) yes 2_555 . 6_555
C(11) C(11) C(12) 88.6(12) yes 4_555 . 6_555
N(4) C(12) C(11) 125.2(15) yes . . 6_554
N(4) C(12) C(12) 53.4(8) yes . . 2_555
N(4) C(12) C(12) 53.4(8) yes . . 4_555
C(11) C(12) C(12) 91.4(13) yes 6_554 . 2_555
C(11) C(12) C(12) 92.3(12) yes 6_554 . 4_555
C(12) C(12) C(12) 90.0(12) yes 2_555 . 4_555
N(5) C(13) C(14) 124.3(6) yes . . .
C(13) C(14) C(15) 120.2(7) yes . . .
C(14) C(15) C(14) 116.2(8) yes . . 3_655
C(14) C(15) C(15) 121.9(4) yes . . 14_665
C(14) C(15) C(15) 121.9(4) yes 3_655 . 14_665

loop_
_geom_torsion_atom_site_label_1
_geom_torsion_atom_site_label_2
_geom_torsion_atom_site_label_3
_geom_torsion_atom_site_label_4
_geom_torsion
_geom_torsion_publ_flag
_geom_torsion_site_symmetry_1
_geom_torsion_site_symmetry_2
_geom_torsion_site_symmetry_3
_geom_torsion_site_symmetry_4
N(1) Co(1) N(1) C(1) -141.0(17) ? . . 2_555 2_555
N(1) Co(1) N(1) C(1) 37.5(17) ? 2_555 . . .
N(1) Co(1) N(1) C(1) -52(8) ? . . 3_555 3_555
N(1) Co(1) N(1) C(1) -52(8) ? 3_555 . . .
N(1) Co(1) N(1) C(1) 37.5(17) ? . . 4_555 4_555
N(1) Co(1) N(1) C(1) -141.0(17) ? 4_555 . . .
N(1) Co(1) N(3) C(7) -41.7(8) ? . . . .
N(1) Co(1) N(3) C(7) 48.3(8) ? . . . 2_555
N(1) Co(1) N(3) C(7) 138.3(8) ? . . . 3_555
N(1) Co(1) N(3) C(7) -131.7(8) ? . . . 4_555
N(3) Co(1) N(1) C(1) -51.8(16) ? . . . .
N(1) Co(1) N(4) C(12) 41.1(9) ? . . . .
N(1) Co(1) N(4) C(12) -48.9(8) ? . . . 2_555
N(1) Co(1) N(4) C(12) -138.9(9) ? . . . 3_555
N(1) Co(1) N(4) C(12) 131.1(8) ? . . . 4_555
N(4) Co(1) N(1) C(1) 128.2(16) ? . . . .
N(1) Co(1) N(1) C(1) -141.0(16) ? 2_555 . 3_555 3_555
N(1) Co(1) N(1) C(1) 37.5(17) ? 3_555 . 2_555 2_555
N(1) Co(1) N(1) C(1) -52(8) ? 2_555 . 4_555 4_555
N(1) Co(1) N(1) C(1) -52(8) ? 4_555 . 2_555 2_555
N(1) Co(1) N(3) C(7) -131.7(8) ? 2_555 . . .
N(1) Co(1) N(3) C(7) -41.7(8) ? 2_555 . . 2_555
N(1) Co(1) N(3) C(7) 48.3(8) ? 2_555 . . 3_555
N(1) Co(1) N(3) C(7) 138.3(8) ? 2_555 . . 4_555
N(3) Co(1) N(1) C(1) -51.8(16) ? . . 2_555 2_555
N(1) Co(1) N(4) C(12) 131.1(9) ? 2_555 . . .
N(1) Co(1) N(4) C(12) 41.1(8) ? 2_555 . . 2_555
N(1) Co(1) N(4) C(12) -48.9(9) ? 2_555 . . 3_555
N(1) Co(1) N(4) C(12) -138.9(8) ? 2_555 . . 4_555
N(4) Co(1) N(1) C(1) 128.2(16) ? . . 2_555 2_555
N(1) Co(1) N(1) C(1) -141.0(17) ? 3_555 . 4_555 4_555
N(1) Co(1) N(1) C(1) 37.5(16) ? 4_555 . 3_555 3_555
N(1) Co(1) N(3) C(7) 138.3(8) ? 3_555 . . .
N(1) Co(1) N(3) C(7) -131.7(8) ? 3_555 . . 2_555
N(1) Co(1) N(3) C(7) -41.7(8) ? 3_555 . . 3_555
N(1) Co(1) N(3) C(7) 48.3(8) ? 3_555 . . 4_555
N(3) Co(1) N(1) C(1) -51.8(16) ? . . 3_555 3_555
N(1) Co(1) N(4) C(12) -138.9(9) ? 3_555 . . .
N(1) Co(1) N(4) C(12) 131.1(8) ? 3_555 . . 2_555
N(1) Co(1) N(4) C(12) 41.1(9) ? 3_555 . . 3_555
N(1) Co(1) N(4) C(12) -48.9(8) ? 3_555 . . 4_555
N(4) Co(1) N(1) C(1) 128.2(16) ? . . 3_555 3_555
N(1) Co(1) N(3) C(7) 48.3(8) ? 4_555 . . .
N(1) Co(1) N(3) C(7) 138.3(8) ? 4_555 . . 2_555
N(1) Co(1) N(3) C(7) -131.7(8) ? 4_555 . . 3_555
N(1) Co(1) N(3) C(7) -41.7(8) ? 4_555 . . 4_555
N(3) Co(1) N(1) C(1) -51.8(17) ? . . 4_555 4_555
N(1) Co(1) N(4) C(12) -48.9(9) ? 4_555 . . .
N(1) Co(1) N(4) C(12) -138.9(8) ? 4_555 . . 2_555
N(1) Co(1) N(4) C(12) 131.1(9) ? 4_555 . . 3_555
N(1) Co(1) N(4) C(12) 41.1(8) ? 4_555 . . 4_555
N(4) Co(1) N(1) C(1) 128.2(17) ? . . 4_555 4_555
N(2) Co(2) N(2) C(3) -68(10) ? . . 3_655 3_655
N(2) Co(2) N(2) C(3) -68(10) ? 3_655 . . .
N(2) Co(2) N(2) C(3) 158.0(15) ? . . 10_566 10_566
N(2) Co(2) N(2) C(3) 23.0(14) ? 10_566 . . .
N(2) Co(2) N(2) C(3) -23.0(15) ? . . 12_646 12_646
N(2) Co(2) N(2) C(3) -158.0(14) ? 12_646 . . .
N(2) Co(2) N(5) C(13) 53.1(4) ? . . . .
N(2) Co(2) N(5) C(13) -126.9(4) ? . . . 3_655
N(5) Co(2) N(2) C(3) -67.5(14) ? . . . .
N(2) Co(2) N(5) C(13) -143.1(3) ? . . 10_566 10_566
N(5) Co(2) N(2) C(3) 112.5(14) ? 10_566 . . .
N(2) Co(2) N(2) C(3) -23.0(15) ? 3_655 . 10_566 10_566
N(2) Co(2) N(2) C(3) -158.0(14) ? 10_566 . 3_655 3_655
N(2) Co(2) N(2) C(3) 158.0(15) ? 3_655 . 12_646 12_646
N(2) Co(2) N(2) C(3) 23.0(14) ? 12_646 . 3_655 3_655
N(2) Co(2) N(5) C(13) -126.9(4) ? 3_655 . . .
N(2) Co(2) N(5) C(13) 53.1(4) ? 3_655 . . 3_655
N(5) Co(2) N(2) C(3) -67.5(14) ? . . 3_655 3_655
N(2) Co(2) N(5) C(13) 36.9(3) ? 3_655 . 10_566 10_566
N(5) Co(2) N(2) C(3) 112.5(14) ? 10_566 . 3_655 3_655
N(2) Co(2) N(2) C(3) 68(10) ? 10_566 . 12_646 12_646
N(2) Co(2) N(2) C(3) 68(10) ? 12_646 . 10_566 10_566
N(2) Co(2) N(5) C(13) -36.9(4) ? 10_566 . . .
N(2) Co(2) N(5) C(13) 143.1(4) ? 10_566 . . 3_655
N(5) Co(2) N(2) C(3) -112.5(15) ? . . 10_566 10_566
N(2) Co(2) N(5) C(13) -53.1(3) ? 10_566 . 10_566 10_566
N(5) Co(2) N(2) C(3) 67.5(15) ? 10_566 . 10_566 10_566
N(2) Co(2) N(5) C(13) 143.1(4) ? 12_646 . . .
N(2) Co(2) N(5) C(13) -36.9(4) ? 12_646 . . 3_655
N(5) Co(2) N(2) C(3) -112.5(15) ? . . 12_646 12_646
N(2) Co(2) N(5) C(13) 126.9(3) ? 12_646 . 10_566 10_566
N(5) Co(2) N(2) C(3) 67.5(15) ? 10_566 . 12_646 12_646
Co(1) N(1) C(1) C(2) -24(7) ? . . . .
Co(2) N(2) C(3) C(2) -25(7) ? . . . .
Co(1) N(3) C(7) C(8) 179.9(10) ? . . . .
Co(1) N(3) C(7) C(7) 118.4(7) ? . . . 2_555
Co(1) N(3) C(7) C(7) -118.4(8) ? . . . 4_555
Co(1) N(3) C(7) C(8) 179.9(9) ? . . 2_555 2_555
Co(1) N(3) C(7) C(7) -118.4(7) ? . . 2_555 .
Co(1) N(3) C(7) C(8) 179.9(10) ? . . 3_555 3_555
Co(1) N(3) C(7) C(7) -118.4(8) ? . . 3_555 2_555
Co(1) N(3) C(7) C(7) 118.4(7) ? . . 3_555 4_555
Co(1) N(3) C(7) C(8) 179.9(9) ? . . 4_555 4_555
Co(1) N(3) C(7) C(7) 118.4(8) ? . . 4_555 .
C(7) N(3) C(7) C(8) -61.8(16) ? . . 2_555 2_555
C(7) N(3) C(7) C(8) 61.5(16) ? 2_555 . . .
C(7) N(3) C(7) C(7) 123.3(10) ? 2_555 . . 4_555
C(7) N(3) C(7) C(8) -0.1(19) ? . . 3_555 3_555
C(7) N(3) C(7) C(7) 61.6(11) ? . . 3_555 2_555
C(7) N(3) C(7) C(7) -61.6(11) ? . . 3_555 4_555
C(7) N(3) C(7) C(8) -0.1(16) ? 3_555 . . .
C(7) N(3) C(7) C(7) -61.6(11) ? 3_555 . . 2_555
C(7) N(3) C(7) C(7) 61.6(11) ? 3_555 . . 4_555
C(7) N(3) C(7) C(8) 61.5(16) ? . . 4_555 4_555
C(7) N(3) C(7) C(8) -61.8(16) ? 4_555 . . .
C(7) N(3) C(7) C(7) -123.3(10) ? 4_555 . . 2_555
C(7) N(3) C(7) C(8) -61.8(16) ? 2_555 . 3_555 3_555
C(7) N(3) C(7) C(7) -123.3(10) ? 2_555 . 3_555 4_555
C(7) N(3) C(7) C(8) 61.5(16) ? 3_555 . 2_555 2_555
C(7) N(3) C(7) C(7) 123.3(10) ? 3_555 . 2_555 .
C(7) N(3) C(7) C(8) -0.1(16) ? 2_555 . 4_555 4_555
C(7) N(3) C(7) C(7) -61.6(11) ? 2_555 . 4_555 .
C(7) N(3) C(7) C(8) -0.1(17) ? 4_555 . 2_555 2_555
C(7) N(3) C(7) C(7) 61.6(11) ? 4_555 . 2_555 .
C(7) N(3) C(7) C(8) -61.8(16) ? 3_555 . 4_555 4_555
C(7) N(3) C(7) C(7) -123.3(10) ? 3_555 . 4_555 .
C(7) N(3) C(7) C(8) 61.5(16) ? 4_555 . 3_555 3_555
C(7) N(3) C(7) C(7) 123.3(10) ? 4_555 . 3_555 2_555
Co(1) N(4) C(12) C(11) -179.2(13) ? . . . 6_554
Co(1) N(4) C(12) C(12) -118.3(8) ? . . . 2_555
Co(1) N(4) C(12) C(12) 118.3(8) ? . . . 4_555
Co(1) N(4) C(12) C(12) 118.3(7) ? . . 2_555 .
Co(1) N(4) C(12) C(12) 118.3(8) ? . . 3_555 2_555
Co(1) N(4) C(12) C(12) -118.3(8) ? . . 3_555 4_555
Co(1) N(4) C(12) C(12) -118.3(8) ? . . 4_555 .
C(12) N(4) C(12) C(11) -60.9(18) ? 2_555 . . 6_554
C(12) N(4) C(12) C(12) -123.4(11) ? 2_555 . . 4_555
C(12) N(4) C(12) C(12) -61.7(12) ? . . 3_555 2_555
C(12) N(4) C(12) C(12) 61.7(12) ? . . 3_555 4_555
C(12) N(4) C(12) C(11) 0.8(15) ? 3_555 . . 6_554
C(12) N(4) C(12) C(12) 61.7(12) ? 3_555 . . 2_555
C(12) N(4) C(12) C(12) -61.7(12) ? 3_555 . . 4_555
C(12) N(4) C(12) C(11) 62.5(18) ? 4_555 . . 6_554
C(12) N(4) C(12) C(12) 123.4(11) ? 4_555 . . 2_555
C(12) N(4) C(12) C(12) 123.4(11) ? 2_555 . 3_555 4_555
C(12) N(4) C(12) C(12) -123.4(11) ? 3_555 . 2_555 .
C(12) N(4) C(12) C(12) 61.7(11) ? 2_555 . 4_555 .
C(12) N(4) C(12) C(12) -61.7(11) ? 4_555 . 2_555 .
C(12) N(4) C(12) C(12) 123.4(11) ? 3_555 . 4_555 .
C(12) N(4) C(12) C(12) -123.4(11) ? 4_555 . 3_555 2_555
Co(2) N(5) C(13) C(14) 179.8(4) ? . . . .
Co(2) N(5) C(13) C(14) 179.8(4) ? . . 3_655 3_655
C(13) N(5) C(13) C(14) -0.2(8) ? . . 3_655 3_655
C(13) N(5) C(13) C(14) -0.2(5) ? 3_655 . . .
N(1) C(1) C(2) C(3) 168(5) ? . . . .
N(1) C(1) C(2) C(4) -10(6) ? . . . .
C(1) C(2) C(3) N(2) 174(6) ? . . . .
C(1) C(2) C(4) C(5) -4.9(10) ? . . . .
C(1) C(2) C(4) C(6) 177.3(6) ? . . . 9_666
C(3) C(2) C(4) C(5) 177.4(6) ? . . . .
C(3) C(2) C(4) C(6) -0.4(8) ? . . . 9_666
C(4) C(2) C(3) N(2) -8(7) ? . . . .
C(2) C(4) C(5) C(6) -179.4(6) ? . . . .
C(2) C(4) C(6) C(5) 179.4(6) ? . . 9_666 9_666
C(5) C(4) C(6) C(5) 1.5(11) ? . . 9_666 9_666
C(6) C(4) C(5) C(6) -1.5(10) ? 9_666 . . .
C(4) C(5) C(6) C(4) 1.5(11) ? . . . 9_666
N(3) C(7) C(7) C(8) 133.5(13) ? . . 2_555 2_555
N(3) C(7) C(7) C(8) -133.7(14) ? . . 4_555 4_555
N(3) C(7) C(8) C(9) 0(2) ? . . . .
N(3) C(7) C(8) C(8) -44.8(17) ? . . . 2_555
N(3) C(7) C(8) C(8) 45.2(18) ? . . . 4_555
C(7) C(7) C(7) N(3) 42.2(8) ? 2_555 . 4_555 .
C(7) C(7) C(7) C(8) -91.5(12) ? 2_555 . 4_555 4_555
C(7) C(7) C(7) N(3) -42.2(7) ? 4_555 . 2_555 .
C(7) C(7) C(7) C(8) 91.3(11) ? 4_555 . 2_555 2_555
C(7) C(7) C(8) C(9) 45.2(16) ? 2_555 . . .
C(7) C(7) C(8) C(8) 0.1(9) ? 2_555 . . 2_555
C(7) C(7) C(8) C(8) 90.2(11) ? 2_555 . . 4_555
C(8) C(7) C(7) N(3) -133.7(13) ? . . 2_555 .
C(8) C(7) C(7) C(8) -0.2(10) ? . . 2_555 2_555
C(7) C(7) C(8) C(9) -44.8(17) ? 4_555 . . .
C(7) C(7) C(8) C(8) -89.9(11) ? 4_555 . . 2_555
C(7) C(7) C(8) C(8) 0.1(10) ? 4_555 . . 4_555
C(8) C(7) C(7) N(3) 133.5(14) ? . . 4_555 .
C(8) C(7) C(7) C(8) -0.2(12) ? . . 4_555 4_555
C(7) C(8) C(8) C(7) -0.2(10) ? . . 2_555 2_555
C(7) C(8) C(8) C(9) 130.8(13) ? . . 2_555 .
C(7) C(8) C(8) C(7) -0.2(11) ? . . 4_555 4_555
C(7) C(8) C(8) C(9) -130.9(14) ? . . 4_555 .
C(7) C(8) C(9) C(8) -61.7(16) ? . . . 2_555
C(7) C(8) C(9) C(8) -0.1(18) ? . . . 3_555
C(7) C(8) C(9) C(8) 61.5(16) ? . . . 4_555
C(7) C(8) C(9) C(10) 179.9(9) ? . . . .
C(8) C(8) C(8) C(7) 88.5(12) ? 2_555 . 4_555 4_555
C(8) C(8) C(8) C(9) -42.3(8) ? 2_555 . 4_555 .
C(8) C(8) C(8) C(7) -88.7(11) ? 4_555 . 2_555 2_555
C(8) C(8) C(8) C(9) 42.3(8) ? 4_555 . 2_555 .
C(8) C(8) C(9) C(8) 61.6(11) ? 2_555 . . 3_555
C(8) C(8) C(9) C(8) 123.2(11) ? 2_555 . . 4_555
C(8) C(8) C(9) C(10) -118.4(8) ? 2_555 . . .
C(9) C(8) C(8) C(7) -130.9(13) ? . . 2_555 2_555
C(8) C(8) C(9) C(8) -123.2(11) ? 4_555 . . 2_555
C(8) C(8) C(9) C(8) -61.6(11) ? 4_555 . . 3_555
C(8) C(8) C(9) C(10) 118.4(8) ? 4_555 . . .
C(9) C(8) C(8) C(7) 130.8(14) ? . . 4_555 4_555
C(8) C(9) C(10) C(11) 152.4(13) ? . . . .
C(8) C(9) C(10) C(11) -117.6(12) ? . . . 2_555
C(8) C(9) C(10) C(11) -27.6(12) ? . . . 3_555
C(8) C(9) C(10) C(11) 62.4(12) ? . . . 4_555
C(8) C(9) C(10) C(11) 62.4(12) ? 2_555 . . .
C(8) C(9) C(10) C(11) 152.4(12) ? 2_555 . . 2_555
C(8) C(9) C(10) C(11) -117.6(12) ? 2_555 . . 3_555
C(8) C(9) C(10) C(11) -27.6(12) ? 2_555 . . 4_555
C(8) C(9) C(10) C(11) -27.6(12) ? 3_555 . . .
C(8) C(9) C(10) C(11) 62.4(12) ? 3_555 . . 2_555
C(8) C(9) C(10) C(11) 152.4(12) ? 3_555 . . 3_555
C(8) C(9) C(10) C(11) -117.6(12) ? 3_555 . . 4_555
C(8) C(9) C(10) C(11) -117.6(12) ? 4_555 . . .
C(8) C(9) C(10) C(11) -27.6(12) ? 4_555 . . 2_555
C(8) C(9) C(10) C(11) 62.4(12) ? 4_555 . . 3_555
C(8) C(9) C(10) C(11) 152.4(12) ? 4_555 . . 4_555
C(9) C(10) C(11) C(11) 117.7(8) ? . . . 2_555
C(9) C(10) C(11) C(11) -117.7(8) ? . . . 4_555
C(9) C(10) C(11) C(12) 179.3(12) ? . . . 6_555
C(9) C(10) C(11) C(11) -117.7(8) ? . . 2_555 .
C(9) C(10) C(11) C(11) -117.7(8) ? . . 3_555 2_555
C(9) C(10) C(11) C(11) 117.7(8) ? . . 3_555 4_555
C(9) C(10) C(11) C(11) 117.7(8) ? . . 4_555 .
C(11) C(10) C(11) C(11) 124.7(11) ? 2_555 . . 4_555
C(11) C(10) C(11) C(12) 61.6(17) ? 2_555 . . 6_555
C(11) C(10) C(11) C(11) 62.3(13) ? . . 3_555 2_555
C(11) C(10) C(11) C(11) -62.3(13) ? . . 3_555 4_555
C(11) C(10) C(11) C(11) -62.3(13) ? 3_555 . . 2_555
C(11) C(10) C(11) C(11) 62.3(13) ? 3_555 . . 4_555
C(11) C(10) C(11) C(12) -1(2) ? 3_555 . . 6_555
C(11) C(10) C(11) C(11) -124.7(11) ? 4_555 . . 2_555
C(11) C(10) C(11) C(12) -63.0(17) ? 4_555 . . 6_555
C(11) C(10) C(11) C(11) -124.7(11) ? 2_555 . 3_555 4_555
C(11) C(10) C(11) C(11) 124.7(11) ? 3_555 . 2_555 .
C(11) C(10) C(11) C(11) -62.3(12) ? 2_555 . 4_555 .
C(11) C(10) C(11) C(11) 62.3(13) ? 4_555 . 2_555 .
C(11) C(10) C(11) C(11) -124.7(11) ? 3_555 . 4_555 .
C(11) C(10) C(11) C(11) 124.7(11) ? 4_555 . 3_555 2_555
C(11) C(11) C(11) C(10) 41.1(8) ? 2_555 . 4_555 .
C(11) C(11) C(11) C(10) -41.1(8) ? 4_555 . 2_555 .
C(12) C(11) C(11) C(10) -129.7(15) ? 6_555 . 2_555 .
C(12) C(11) C(11) C(10) 128.8(15) ? 6_555 . 4_555 .
C(11) C(12) C(12) N(4) 134.4(14) ? 6_554 . 2_555 .
C(11) C(12) C(12) N(4) -133.5(15) ? 6_554 . 4_555 .
C(12) C(12) C(12) N(4) -42.1(8) ? 2_555 . 4_555 .
C(12) C(12) C(12) N(4) 42.1(7) ? 4_555 . 2_555 .
N(5) C(13) C(14) C(15) 0.4(9) ? . . . .
C(13) C(14) C(15) C(14) -0.2(9) ? . . . 3_655
C(13) C(14) C(15) C(15) 179.8(4) ? . . . 14_665
C(14) C(15) C(15) C(14) -31.6(5) ? . . 14_665 14_665
C(14) C(15) C(15) C(14) 148.4(5) ? 3_655 . 14_665 14_665

loop_
_geom_contact_atom_site_label_1
_geom_contact_atom_site_label_2
_geom_contact_distance
_geom_contact_publ_flag
_geom_contact_site_symmetry_1
_geom_contact_site_symmetry_2
O(1) O(2) 2.44(5) ? . 14_665
O(1) O(3) 2.78(3) ? . .
O(1) C(17) 3.55(7) ? . 14_665
O(2) O(1) 2.44(5) ? . 14_665
O(2) O(4) 2.94(4) ? . .
O(2) O(4) 3.26(4) ? . 2_555
O(2) C(8) 3.54(3) ? . 7_554
O(2) C(19) 3.34(5) ? . 2_555
O(3) O(1) 2.78(3) ? . .
O(3) O(3) 3.53(3) ? . 16_455
O(3) O(4) 2.51(4) ? . 15_655
O(3) C(16) 3.47(4) ? . .
O(4) O(2) 2.94(4) ? . .
O(4) O(2) 3.26(4) ? . 4_555
O(4) O(3) 2.51(4) ? . 15_645
O(4) C(7) 3.33(3) ? . 7_554
O(4) C(8) 2.60(3) ? . 7_554
O(4) C(11) 3.50(3) ? . 5_554
O(4) C(17) 3.10(6) ? . 4_555
O(4) C(18) 3.46(4) ? . 15_645
N(4) C(10) 2.821(15) ? . 5_554
N(4) C(11) 2.403(17) ? . 5_554
N(4) C(11) 2.403(17) ? . 7_554
N(4) C(11) 2.403(17) ? . 8_554
C(2) C(17) 3.51(6) ? . 6_555
C(3) C(17) 3.51(6) ? . 6_555
C(7) O(4) 3.33(3) ? . 7_555
C(7) C(19) 2.71(4) ? . 7_555
C(8) O(2) 3.54(3) ? . 7_555
C(8) O(4) 2.60(3) ? . 7_555
C(8) C(19) 2.68(4) ? . 7_555
C(10) N(4) 2.821(15) ? . 5_555
C(10) C(12) 2.383(17) ? . 5_555
C(10) C(12) 2.383(17) ? . 7_555
C(10) C(12) 2.383(17) ? . 8_555
C(11) O(4) 3.50(3) ? . 5_555
C(11) N(4) 2.403(17) ? . 5_555
C(11) C(12) 2.14(2) ? . 5_555
C(11) C(12) 2.13(2) ? . 7_555
C(11) C(12) 2.69(2) ? . 8_555
C(12) C(10) 2.383(17) ? . 5_554
C(12) C(11) 2.14(2) ? . 5_554
C(12) C(11) 2.13(2) ? . 7_554
C(12) C(11) 2.69(2) ? . 8_554
C(15) C(14) 2.518(11) ? . 16_545
C(16) O(3) 3.47(4) ? . .
C(17) O(1) 3.55(7) ? . 14_665
C(17) O(4) 3.10(6) ? . 2_555
C(17) C(2) 3.51(6) ? . 6_554
C(17) C(3) 3.51(6) ? . 6_554
C(17) C(19) 2.54(7) ? . 2_555
C(18) O(4) 3.46(4) ? . 15_655
C(19) O(2) 3.34(5) ? . 4_555
C(19) C(7) 2.71(4) ? . 7_554
C(19) C(8) 2.68(4) ? . 7_554
C(19) C(17) 2.54(6) ? . 4_555


#==============================================================================

#===END

data_General
_audit_creation_date                  '2010-07-10'
_audit_creation_method                'by CrystalStructure 3.8'
_audit_update_record                   ?

#==============================================================================

# PROCESSING SUMMARY (IUCr Office Use Only)

_journal_date_recd_electronic     ?
_journal_date_from_coeditor       ?
_journal_date_accepted            ?
_journal_coeditor_code            ?

#==============================================================================

# SUBMISSION DETAILS

_publ_contact_author_name             'Susumu Kitagawa'
_publ_contact_author_address          
;                                      Department of Synthetic Chemistry 
                                       and Biological Chemistry, 
                                       Graduate School of Engineering, 
                                       Kyoto University, 
                                       Katsura, Kyoto 615-8510, Japan 
;
_publ_contact_author_email            'kitagawa@sbchem.kyoto-u.ac.jp'
_publ_contact_author_fax              '+81-75-383-2732'
_publ_contact_author_phone            '+81-75-383-2733'
_publ_contact_letter
;
    ENTER TEXT OF LETTER
;
_publ_requested_journal               'ENTER JOURNAL NAME HERE'
_publ_requested_category              'CHOOSE FI FM FO CI CM CO or AD'
_publ_requested_coeditor_name          ?

#==============================================================================

# TITLE AND AUTHOR LIST

_publ_section_title
;
  Synthesis of TCNQ-based porous coordination polymers with several metal ions  
  and guest dependent properties
;
_publ_section_title_footnote
;
    ENTER FOOTNOTE TO TITLE OF PAPER
;
loop_
_publ_author_name
_publ_author_footnote
_publ_author_address
' Satoru Shimomura '
;
  FIRST AUTHORS FOOTNOTES
;
; Department of Synthetic Chemistry and Biological Chemistry, 
  Graduate School of Engineering, 
  Kyoto University, 
  Katsura, Kyoto 615-8510, Japan
;
_publ_section_synopsis
;
  ENTER SYNOPSIS
;

#==============================================================================

# TEXT

_publ_section_abstract
;
    ENTER ABSTRACT
;
_publ_section_comment
;
    ENTER TEXT
;
_publ_section_references
;
    ENTER OTHER REFERENCES

    Rigaku Americas and Rigaku Corporation. (2007).
    CrystalStructure (Version 3.8). 
    Single Crystal Structure Analysis Software.
    Rigaku Americas, 9009 TX, USA 77381-5209.
    Rigaku, Tokyo 196-8666, Japan.

    Burla, M.C., Camalli, M., Carrozzini, B., Cascarano, G.L., 
    Giacovazzo, C., Polidori, G., Spagna., R. 
    (2003). 
    SIR2002

    Carruthers, J.R., Rollett,J.S., Betteridge, P.W.,
	 Kinna, D., Pearce, L., Larsen, A., and Gabe, E.(1999)
    CRYSTALS Issue 11, Chemical Crystallography Laboratory, Oxford, UK.

    Carruthers, J.R. and Watkin, D.J. (1979), Acta Cryst, A35, 698-699

;
_publ_section_figure_captions
;
    ENTER FIGURE CAPTIONS
;
_publ_section_exptl_prep
;
    ENTER COMPOUND PREPARATION DETAILS
;
_publ_section_exptl_refinement
;
    ENTER SPECIAL DETAILS OF THE REFINEMENT
;

#==============================================================================

data___091026_CdTb_as_1

#==============================================================================

# CHEMICAL DATA

_chemical_formula_sum                  'C30 H10 Cd N6 O8 '
_chemical_formula_moiety               'C30 H10 Cd N6 O8 '
_chemical_formula_weight               694.85
_chemical_melting_point                ?

#==============================================================================

# CRYSTAL DATA
_symmetry_cell_setting                 tetragonal
_symmetry_space_group_name_H-M        'P 4/n c c'
_symmetry_space_group_name_Hall       '-P 4a 2ac'
_symmetry_Int_Tables_number            130
loop_
_symmetry_equiv_pos_site_id
_symmetry_equiv_pos_as_xyz
1   '+X,+Y,+Z'
2   '1/2-Y,+X,+Z'
3   '1/2-X,1/2-Y,+Z'
4   '+Y,1/2-X,+Z'
5   '1/2-X,+Y,1/2+Z'
6   '+Y,+X,1/2+Z'
7   '+X,1/2-Y,1/2+Z'
8   '1/2-Y,1/2-X,1/2+Z'
9   '-X,-Y,-Z'
10  '1/2+Y,-X,-Z'
11  '1/2+X,1/2+Y,-Z'
12  '-Y,1/2+X,-Z'
13  '1/2+X,-Y,1/2-Z'
14  '-Y,-X,1/2-Z'
15  '-X,1/2+Y,1/2-Z'
16  '1/2+Y,1/2+X,1/2-Z'

#------------------------------------------------------------------------------

_cell_length_a                         17.571(14)
_cell_length_b                         17.571(14)
_cell_length_c                         23.404(18)
_cell_angle_alpha                      90.0000
_cell_angle_beta                       90.0000
_cell_angle_gamma                      90.0000
_cell_volume                           7226(10)
_cell_formula_units_Z                  8
_cell_measurement_reflns_used          240
_cell_measurement_theta_min            2.6
_cell_measurement_theta_max            27.5
_cell_measurement_temperature          223.1

#------------------------------------------------------------------------------

_exptl_crystal_description            'prism'
_exptl_crystal_colour                 'colorless'
_exptl_crystal_size_max                0.20
_exptl_crystal_size_mid                0.20
_exptl_crystal_size_min                0.20
_exptl_crystal_density_diffrn          1.277
_exptl_crystal_density_meas            ?
_exptl_crystal_density_method         'not measured'
_exptl_crystal_F_000                   2752.00
_exptl_absorpt_coefficient_mu          0.655
_exptl_absorpt_correction_type         multi-scan
_exptl_absorpt_process_details         
'Jacobson, R. (1998) Private communication'
_exptl_absorpt_correction_T_min        0.692
_exptl_absorpt_correction_T_max        0.877

#==============================================================================

# EXPERIMENTAL DATA

_diffrn_radiation_type                'Mo K\a'
_diffrn_radiation_wavelength           0.71070
_diffrn_measurement_device_type       'Rigaku Mercury'
_diffrn_measurement_method             \w
_diffrn_detector_area_resol_mean       7.31
_diffrn_reflns_number                  47256
_diffrn_reflns_av_R_equivalents        0.063
_diffrn_reflns_theta_max               27.48
_diffrn_measured_fraction_theta_max    0.992
_diffrn_reflns_theta_full              27.48
_diffrn_measured_fraction_theta_full   0.992
_diffrn_reflns_limit_h_min             -22
_diffrn_reflns_limit_h_max             22
_diffrn_reflns_limit_k_min             -14
_diffrn_reflns_limit_k_max             22
_diffrn_reflns_limit_l_min             -29
_diffrn_reflns_limit_l_max             29
_diffrn_ambient_temperature            223.1

#==============================================================================

# REFINEMENT DATA

_refine_special_details
;
    Refinement was performed using reflections with F^2^ > 2.0 sigma(F^2^).
    The weighted R-factor(wR), goodness of fit (S) and R-factor (gt) are 
    based on F, with F set to zero for negative F. The threshold expression of
    F^2^ > 2.0 sigma(F^2^) is used only for calculating R-factor (gt).
;
_reflns_number_total                   4129
_reflns_number_gt                      2186
_reflns_threshold_expression           F^2^>2.0\s(F^2^)
_refine_ls_structure_factor_coef       F
_refine_ls_R_factor_gt                 0.0504
_refine_ls_wR_factor_ref               0.0560
_refine_ls_hydrogen_treatment          refall
_refine_ls_number_reflns               2196
_refine_ls_number_parameters           194
_refine_ls_goodness_of_fit_ref         1.052
_refine_ls_weighting_scheme            calc
_refine_ls_weighting_details
;
    Chebychev polynomial with 3 parameters (Carruthers & Watkin, 1979)
    11.8685    -1.3756    9.7787
;
_refine_ls_shift/su_max                0.0000
_refine_diff_density_max               2.09
_refine_diff_density_min               -1.17
_refine_ls_extinction_method           none
_refine_ls_extinction_coef             ?

loop_
_atom_type_symbol
_atom_type_description
_atom_type_scat_dispersion_real
_atom_type_scat_dispersion_imag
_atom_type_scat_source
  'C' 'C'  0.003 0.002 
;
International Tables for Crystallography
(1992, Vol. C, Tables 4.2.6.8 and 6.1.1.4)
;
  'H' 'H'  0.000 0.000 
;
International Tables for Crystallography
(1992, Vol. C, Table 6.1.1.4)
;
  'N' 'N'  0.006 0.003 
;
International Tables for Crystallography
(1992, Vol. C, Tables 4.2.6.8 and 6.1.1.4)
;
  'O' 'O'  0.011 0.006 
;
International Tables for Crystallography
(1992, Vol. C, Tables 4.2.6.8 and 6.1.1.4)
;
  'Cd' 'Cd'  -0.807 1.202 
;
International Tables for Crystallography
(1992, Vol. C, Tables 4.2.6.8 and 6.1.1.4)
;

#==============================================================================

# ATOMIC COORDINATES AND THERMAL PARAMETERS

loop_
_atom_site_label
_atom_site_type_symbol
_atom_site_fract_x
_atom_site_fract_y
_atom_site_fract_z
_atom_site_U_iso_or_equiv
_atom_site_adp_type
_atom_site_occupancy
_atom_site_symmetry_multiplicity
_atom_site_calc_flag
_atom_site_refinement_flags
_atom_site_disorder_assembly
_atom_site_disorder_group
 Cd(1) Cd 0.7500 0.7500 0.43627(2) 0.02532(11) Uani 1.00 4 d S . .
 Cd(2) Cd 0.7500 0.2500 0.5000 0.02687(11) Uani 1.00 4 d S . .
 O(1) O 0.5477(15) 0.6378(14) 0.1717(11) 0.405(12) Uiso 1.00 1 d . . .
 O(2) O 0.3398(10) 0.5162(10) 0.2304(8) 0.306(7) Uiso 1.00 1 d . . .
 O(3) O 0.6539(17) 0.5133(16) 0.1844(13) 0.422(16) Uiso 1.00 1 d . . .
 O(4) O 0.5186(11) 0.3088(10) 0.2134(9) 0.330(9) Uiso 1.00 1 d . . .
 N(1) N 0.7756(2) 0.6201(2) 0.43760(18) 0.0432(10) Uani 1.00 1 d . . .
 N(2) N 0.7613(2) 0.3817(2) 0.50174(18) 0.0431(11) Uani 1.00 1 d . . .
 N(3) N 0.7500 0.7500 0.5368(3) 0.0437(15) Uani 1.00 4 d S . .
 N(4) N 0.7500 0.7500 0.8390(2) 0.0353(12) Uani 1.00 4 d S . .
 N(5) N 0.7500 0.2500 0.5993(2) 0.0418(13) Uani 1.00 2 d S . .
 C(1) C 0.8025(2) 0.5650(2) 0.4561(2) 0.0368(11) Uani 1.00 1 d . . .
 C(2) C 0.8383(2) 0.5008(2) 0.4784(2) 0.0381(12) Uani 1.00 1 d . . .
 C(3) C 0.7945(2) 0.4371(2) 0.4904(2) 0.0349(11) Uani 1.00 1 d . . .
 C(4) C 0.9206(2) 0.5006(2) 0.4893(2) 0.0367(11) Uani 1.00 1 d . . .
 C(5) C 0.9660(2) 0.5635(2) 0.4772(2) 0.0467(13) Uani 1.00 1 d . . .
 C(6) C 0.9569(2) 0.4366(2) 0.5121(2) 0.0433(14) Uani 1.00 1 d . . .
 C(7) C 0.7193(8) 0.6970(6) 0.5658(3) 0.058(3) Uani 0.50 1 d P . .
 C(8) C 0.7171(8) 0.6926(6) 0.6245(4) 0.065(3) Uani 0.50 1 d P . .
 C(9) C 0.7500 0.7500 0.6553(3) 0.0441(16) Uani 1.00 4 d S . .
 C(10) C 0.7500 0.7500 0.7199(3) 0.0434(16) Uani 1.00 4 d S . .
 C(11) C 0.8070(8) 0.7794(13) 0.7504(4) 0.093(5) Uani 0.50 1 d P . .
 C(12) C 0.8040(8) 0.7787(14) 0.8083(5) 0.097(5) Uani 0.50 1 d P . .
 C(13) C 0.7828(4) 0.1950(3) 0.6278(2) 0.0660(18) Uani 1.00 1 d . . .
 C(14) C 0.7849(5) 0.1925(4) 0.6870(2) 0.069(2) Uani 1.00 1 d . . .
 C(15) C 0.7500 0.2500 0.7186(2) 0.0451(17) Uani 1.00 2 d S . .
 C(16) C 0.518(2) 0.641(2) 0.116(2) 0.48(2) Uiso 1.00 1 d . . .
 C(17) C 0.6707(18) 0.493(2) 0.1415(16) 0.340(17) Uiso 1.00 1 d . . .
 C(18) C 0.3980(19) 0.4937(16) 0.1828(12) 0.338(13) Uiso 1.00 1 d . . .
 C(19) C 0.5410(18) 0.3239(16) 0.1582(14) 0.309(12) Uiso 1.00 1 d . . .
 H(1) H 0.9432 0.6075 0.4609 0.056 Uiso 1.00 1 c R . .
 H(2) H 0.9278 0.3922 0.5200 0.052 Uiso 1.00 1 c R . .
 H(3) H 0.6959 0.6570 0.5450 0.070 Uiso 0.50 1 c R . .
 H(4) H 0.6935 0.6509 0.6433 0.078 Uiso 0.50 1 c R . .
 H(5) H 0.8498 0.8008 0.7315 0.112 Uiso 0.50 1 c R . .
 H(6) H 0.8457 0.8008 0.8282 0.116 Uiso 0.50 1 c R . .
 H(7) H 0.8066 0.1553 0.6069 0.079 Uiso 1.00 1 c R . .
 H(8) H 0.8097 0.1516 0.7059 0.083 Uiso 1.00 1 c R . .


loop_
_atom_site_aniso_label
_atom_site_aniso_U_11
_atom_site_aniso_U_22
_atom_site_aniso_U_33
_atom_site_aniso_U_12
_atom_site_aniso_U_13
_atom_site_aniso_U_23
 Cd(1) 0.0275(2) 0.0275(2) 0.0210(2) 0.0000 0.0000 0.0000
 Cd(2) 0.0265(2) 0.0265(2) 0.0276(3) 0.0000 0.0000 0.0000
 N(1) 0.0437(19) 0.0291(19) 0.057(2) 0.0021(15) -0.0031(17) 0.0114(18)
 N(2) 0.042(2) 0.0266(18) 0.061(2) -0.0035(16) -0.0035(17) 0.0077(14)
 N(3) 0.050(2) 0.050(2) 0.030(3) 0.0000 0.0000 0.0000
 N(4) 0.043(2) 0.043(2) 0.019(2) 0.0000 0.0000 0.0000
 N(5) 0.058(3) 0.035(2) 0.032(2) 0.006(4) 0.0000 0.0000
 C(1) 0.035(2) 0.037(2) 0.038(2) -0.0091(18) -0.0015(17) -0.0001(18)
 C(2) 0.031(2) 0.0258(19) 0.058(3) -0.0010(16) -0.0022(19) 0.0025(19)
 C(3) 0.032(2) 0.031(2) 0.042(2) 0.0040(17) -0.0045(18) 0.0005(18)
 C(4) 0.034(2) 0.027(2) 0.049(2) 0.0017(19) -0.003(2) 0.003(2)
 C(5) 0.037(2) 0.031(2) 0.073(3) 0.0063(19) -0.005(2) 0.016(2)
 C(6) 0.036(2) 0.027(2) 0.067(3) -0.0040(19) 0.002(2) 0.012(2)
 C(7) 0.106(9) 0.041(5) 0.027(4) -0.035(5) 0.013(4) -0.003(3)
 C(8) 0.107(8) 0.071(7) 0.018(3) -0.046(6) 0.016(5) 0.002(4)
 C(9) 0.056(3) 0.056(3) 0.021(3) 0.0000 0.0000 0.0000
 C(10) 0.057(3) 0.057(3) 0.016(3) 0.0000 0.0000 0.0000
 C(11) 0.069(9) 0.183(16) 0.028(5) -0.073(9) 0.012(4) -0.009(6)
 C(12) 0.060(7) 0.195(17) 0.036(5) -0.064(8) -0.005(5) -0.004(8)
 C(13) 0.100(4) 0.061(3) 0.038(3) 0.029(3) -0.001(2) -0.010(2)
 C(14) 0.109(5) 0.064(3) 0.035(3) 0.034(3) -0.010(2) 0.003(2)
 C(15) 0.056(3) 0.049(3) 0.031(3) 0.005(5) 0.0000 0.0000

#==============================================================================

_computing_data_collection            'CrystalClear'
_computing_cell_refinement            'CrystalClear'
_computing_data_reduction             'CrystalStructure'
_computing_structure_solution         'SIR2002'
_computing_structure_refinement       'CRYSTALS'
_computing_publication_material       'CrystalStructure 3.8'
_computing_molecular_graphics          ?

#==============================================================================

# MOLECULAR GEOMETRY

_geom_special_details
;
    ENTER SPECIAL DETAILS OF THE MOLECULAR GEOMETRY
;

loop_
_geom_bond_atom_site_label_1
_geom_bond_atom_site_label_2
_geom_bond_distance
_geom_bond_publ_flag
_geom_bond_site_symmetry_1
_geom_bond_site_symmetry_2
Cd(1) N(1) 2.327(4) yes . .
Cd(1) N(1) 2.327(4) yes . 2_655
Cd(1) N(1) 2.327(4) yes . 3_665
Cd(1) N(1) 2.327(4) yes . 4_565
Cd(1) N(3) 2.353(7) yes . .
Cd(1) N(4) 2.276(6) yes . 5_654
Cd(2) N(2) 2.323(3) yes . .
Cd(2) N(2) 2.323(3) yes . 3_655
Cd(2) N(2) 2.323(3) yes . 10_566
Cd(2) N(2) 2.323(3) yes . 12_646
Cd(2) N(5) 2.324(5) yes . .
Cd(2) N(5) 2.324(5) yes . 10_566
O(1) C(16) 1.41(6) yes . .
O(2) C(18) 1.57(3) yes . .
O(3) C(17) 1.11(4) yes . .
O(4) C(19) 1.38(4) yes . .
N(1) C(1) 1.160(6) yes . .
N(2) C(3) 1.167(5) yes . .
N(3) C(7) 1.272(11) yes . .
N(3) C(7) 1.272(13) yes . 2_655
N(3) C(7) 1.272(11) yes . 3_665
N(3) C(7) 1.272(13) yes . 4_565
N(4) C(12) 1.294(16) yes . .
N(4) C(12) 1.29(2) yes . 2_655
N(4) C(12) 1.294(16) yes . 3_665
N(4) C(12) 1.29(2) yes . 4_565
N(5) C(13) 1.308(7) yes . .
N(5) C(13) 1.308(7) yes . 3_655
C(1) C(2) 1.395(6) yes . .
C(2) C(3) 1.386(6) yes . .
C(2) C(4) 1.469(6) yes . .
C(4) C(5) 1.392(6) yes . .
C(4) C(6) 1.398(6) yes . .
C(5) C(6) 1.379(6) yes . 9_766
C(7) C(7) 1.52(2) yes . 2_655
C(7) C(7) 1.521(15) yes . 4_565
C(7) C(8) 1.376(13) yes . .
C(8) C(8) 1.64(2) yes . 2_655
C(8) C(8) 1.644(17) yes . 4_565
C(8) C(9) 1.367(12) yes . .
C(9) C(10) 1.513(11) yes . .
C(10) C(11) 1.335(16) yes . .
C(10) C(11) 1.335(19) yes . 2_655
C(10) C(11) 1.335(16) yes . 3_665
C(10) C(11) 1.335(19) yes . 4_565
C(11) C(11) 1.59(2) yes . 2_655
C(11) C(11) 1.59(3) yes . 4_565
C(11) C(12) 1.355(15) yes . .
C(12) C(12) 1.52(2) yes . 2_655
C(12) C(12) 1.52(3) yes . 4_565
C(13) C(14) 1.386(8) yes . .
C(14) C(15) 1.394(8) yes . .
C(15) C(15) 1.469(9) yes . 14_666
C(5) H(1) 0.950 no . .
C(6) H(2) 0.950 no . .
C(7) H(3) 0.950 no . .
C(8) H(4) 0.950 no . .
C(11) H(5) 0.950 no . .
C(12) H(6) 0.950 no . .
C(13) H(7) 0.950 no . .
C(14) H(8) 0.950 no . .

loop_
_geom_angle_atom_site_label_1
_geom_angle_atom_site_label_2
_geom_angle_atom_site_label_3
_geom_angle
_geom_angle_publ_flag
_geom_angle_site_symmetry_1
_geom_angle_site_symmetry_2
_geom_angle_site_symmetry_3
N(1) Cd(1) N(1) 89.99(14) yes . . 2_655
N(1) Cd(1) N(1) 178.47(14) yes . . 3_665
N(1) Cd(1) N(1) 89.99(14) yes . . 4_565
N(1) Cd(1) N(3) 89.23(10) yes . . .
N(1) Cd(1) N(4) 90.77(10) yes . . 5_654
N(1) Cd(1) N(1) 89.99(14) yes 2_655 . 3_665
N(1) Cd(1) N(1) 178.47(14) yes 2_655 . 4_565
N(1) Cd(1) N(3) 89.23(10) yes 2_655 . .
N(1) Cd(1) N(4) 90.77(10) yes 2_655 . 5_654
N(1) Cd(1) N(1) 89.99(14) yes 3_665 . 4_565
N(1) Cd(1) N(3) 89.23(10) yes 3_665 . .
N(1) Cd(1) N(4) 90.77(10) yes 3_665 . 5_654
N(1) Cd(1) N(3) 89.23(10) yes 4_565 . .
N(1) Cd(1) N(4) 90.77(10) yes 4_565 . 5_654
N(3) Cd(1) N(4) 180.0000 yes . . 5_654
N(2) Cd(2) N(2) 177.99(14) yes . . 3_655
N(2) Cd(2) N(2) 90.02(12) yes . . 10_566
N(2) Cd(2) N(2) 90.02(12) yes . . 12_646
N(2) Cd(2) N(5) 89.00(10) yes . . .
N(2) Cd(2) N(5) 91.00(10) yes . . 10_566
N(2) Cd(2) N(2) 90.02(12) yes 3_655 . 10_566
N(2) Cd(2) N(2) 90.02(12) yes 3_655 . 12_646
N(2) Cd(2) N(5) 89.00(10) yes 3_655 . .
N(2) Cd(2) N(5) 91.00(10) yes 3_655 . 10_566
N(2) Cd(2) N(2) 177.99(14) yes 10_566 . 12_646
N(2) Cd(2) N(5) 91.00(10) yes 10_566 . .
N(2) Cd(2) N(5) 89.00(10) yes 10_566 . 10_566
N(2) Cd(2) N(5) 91.00(10) yes 12_646 . .
N(2) Cd(2) N(5) 89.00(10) yes 12_646 . 10_566
N(5) Cd(2) N(5) 180.0000 yes . . 10_566
Cd(1) N(1) C(1) 154.4(3) yes . . .
Cd(2) N(2) C(3) 150.5(3) yes . . .
Cd(1) N(3) C(7) 122.3(5) yes . . .
Cd(1) N(3) C(7) 122.3(5) yes . . 2_655
Cd(1) N(3) C(7) 122.3(5) yes . . 3_665
Cd(1) N(3) C(7) 122.3(5) yes . . 4_565
C(7) N(3) C(7) 73.4(8) yes . . 2_655
C(7) N(3) C(7) 115.4(8) yes . . 3_665
C(7) N(3) C(7) 73.4(7) yes . . 4_565
C(7) N(3) C(7) 73.4(7) yes 2_655 . 3_665
C(7) N(3) C(7) 115.4(8) yes 2_655 . 4_565
C(7) N(3) C(7) 73.4(8) yes 3_665 . 4_565
Cd(1) N(4) C(12) 123.8(6) yes 5_655 . .
Cd(1) N(4) C(12) 123.8(7) yes 5_655 . 2_655
Cd(1) N(4) C(12) 123.8(6) yes 5_655 . 3_665
Cd(1) N(4) C(12) 123.8(7) yes 5_655 . 4_565
C(12) N(4) C(12) 72.0(10) yes . . 2_655
C(12) N(4) C(12) 112.4(9) yes . . 3_665
C(12) N(4) C(12) 72.0(13) yes . . 4_565
C(12) N(4) C(12) 72.0(13) yes 2_655 . 3_665
C(12) N(4) C(12) 112.4(11) yes 2_655 . 4_565
C(12) N(4) C(12) 72.0(10) yes 3_665 . 4_565
Cd(2) N(5) C(13) 120.7(3) yes . . .
Cd(2) N(5) C(13) 120.7(3) yes . . 3_655
C(13) N(5) C(13) 118.6(5) yes . . 3_655
N(1) C(1) C(2) 177.0(4) yes . . .
C(1) C(2) C(3) 118.5(3) yes . . .
C(1) C(2) C(4) 120.8(3) yes . . .
C(3) C(2) C(4) 120.7(4) yes . . .
N(2) C(3) C(2) 176.1(4) yes . . .
C(2) C(4) C(5) 121.7(4) yes . . .
C(2) C(4) C(6) 121.1(4) yes . . .
C(5) C(4) C(6) 117.2(4) yes . . .
C(4) C(5) C(6) 121.6(4) yes . . 9_766
C(4) C(6) C(5) 121.2(4) yes . . 9_766
N(3) C(7) C(7) 53.3(6) yes . . 2_655
N(3) C(7) C(7) 53.3(6) yes . . 4_565
N(3) C(7) C(8) 125.9(10) yes . . .
C(7) C(7) C(7) 90.0(9) yes 2_655 . 4_565
C(7) C(7) C(8) 92.4(9) yes 2_655 . .
C(7) C(7) C(8) 92.7(8) yes 4_565 . .
C(7) C(8) C(8) 87.6(9) yes . . 2_655
C(7) C(8) C(8) 87.3(8) yes . . 4_565
C(7) C(8) C(9) 118.1(10) yes . . .
C(8) C(8) C(8) 90.0(9) yes 2_655 . 4_565
C(8) C(8) C(9) 53.0(6) yes 2_655 . .
C(8) C(8) C(9) 53.0(6) yes 4_565 . .
C(8) C(9) C(8) 73.9(8) yes . . 2_655
C(8) C(9) C(8) 116.5(8) yes . . 3_665
C(8) C(9) C(8) 73.9(7) yes . . 4_565
C(8) C(9) C(10) 121.8(5) yes . . .
C(8) C(9) C(8) 73.9(7) yes 2_655 . 3_665
C(8) C(9) C(8) 116.5(8) yes 2_655 . 4_565
C(8) C(9) C(10) 121.8(5) yes 2_655 . .
C(8) C(9) C(8) 73.9(8) yes 3_665 . 4_565
C(8) C(9) C(10) 121.8(5) yes 3_665 . .
C(8) C(9) C(10) 121.8(5) yes 4_565 . .
C(9) C(10) C(11) 122.4(6) yes . . .
C(9) C(10) C(11) 122.4(6) yes . . 2_655
C(9) C(10) C(11) 122.4(6) yes . . 3_665
C(9) C(10) C(11) 122.4(6) yes . . 4_565
C(11) C(10) C(11) 73.3(10) yes . . 2_655
C(11) C(10) C(11) 115.3(9) yes . . 3_665
C(11) C(10) C(11) 73.3(12) yes . . 4_565
C(11) C(10) C(11) 73.3(12) yes 2_655 . 3_665
C(11) C(10) C(11) 115.3(10) yes 2_655 . 4_565
C(11) C(10) C(11) 73.3(10) yes 3_665 . 4_565
C(10) C(11) C(11) 53.3(8) yes . . 2_655
C(10) C(11) C(11) 53.3(9) yes . . 4_565
C(10) C(11) C(12) 120.2(14) yes . . .
C(11) C(11) C(11) 90.0(13) yes 2_655 . 4_565
C(11) C(11) C(12) 88.1(10) yes 2_655 . .
C(11) C(11) C(12) 88.8(14) yes 4_565 . .
N(4) C(12) C(11) 126.0(14) yes . . .
N(4) C(12) C(12) 54.0(9) yes . . 2_655
N(4) C(12) C(12) 54.0(9) yes . . 4_565
C(11) C(12) C(12) 91.9(11) yes . . 2_655
C(11) C(12) C(12) 91.2(15) yes . . 4_565
C(12) C(12) C(12) 90.0(14) yes 2_655 . 4_565
N(5) C(13) C(14) 123.0(6) yes . . .
C(13) C(14) C(15) 119.7(6) yes . . .
C(14) C(15) C(14) 115.9(5) yes . . 3_655
C(14) C(15) C(15) 122.1(3) yes . . 14_666
C(14) C(15) C(15) 122.1(3) yes 3_655 . 14_666
C(4) C(5) H(1) 119.1 no . . .
C(6) C(5) H(1) 119.3 no 9_766 . .
C(4) C(6) H(2) 119.2 no . . .
C(5) C(6) H(2) 119.5 no 9_766 . .
N(3) C(7) H(3) 116.9 no . . .
C(7) C(7) H(3) 127.6 no 2_655 . .
C(7) C(7) H(3) 127.2 no 4_565 . .
C(8) C(7) H(3) 117.2 no . . .
C(7) C(8) H(4) 121.2 no . . .
C(8) C(8) H(4) 128.6 no 2_655 . .
C(8) C(8) H(4) 129.1 no 4_565 . .
C(9) C(8) H(4) 120.7 no . . .
C(10) C(11) H(5) 119.8 no . . .
C(11) C(11) H(5) 129.3 no 2_655 . .
C(11) C(11) H(5) 128.1 no 4_565 . .
C(12) C(11) H(5) 120.0 no . . .
N(4) C(12) H(6) 116.9 no . . .
C(11) C(12) H(6) 117.1 no . . .
C(12) C(12) H(6) 128.0 no 2_655 . .
C(12) C(12) H(6) 128.1 no 4_565 . .
N(5) C(13) H(7) 118.2 no . . .
C(14) C(13) H(7) 118.7 no . . .
C(13) C(14) H(8) 120.2 no . . .
C(15) C(14) H(8) 120.1 no . . .

loop_
_geom_torsion_atom_site_label_1
_geom_torsion_atom_site_label_2
_geom_torsion_atom_site_label_3
_geom_torsion_atom_site_label_4
_geom_torsion
_geom_torsion_publ_flag
_geom_torsion_site_symmetry_1
_geom_torsion_site_symmetry_2
_geom_torsion_site_symmetry_3
_geom_torsion_site_symmetry_4
N(1) Cd(1) N(1) C(1) -122.6(8) ? . . 2_655 2_655
N(1) Cd(1) N(1) C(1) 55.8(8) ? 2_655 . . .
N(1) Cd(1) N(1) C(1) -33(5) ? . . 3_665 3_665
N(1) Cd(1) N(1) C(1) -33(5) ? 3_665 . . .
N(1) Cd(1) N(1) C(1) 55.8(8) ? . . 4_565 4_565
N(1) Cd(1) N(1) C(1) -122.6(8) ? 4_565 . . .
N(1) Cd(1) N(3) C(7) -41.2(7) ? . . . .
N(1) Cd(1) N(3) C(7) 48.8(6) ? . . . 2_655
N(1) Cd(1) N(3) C(7) 138.8(7) ? . . . 3_665
N(1) Cd(1) N(3) C(7) -131.2(6) ? . . . 4_565
N(3) Cd(1) N(1) C(1) -33.4(8) ? . . . .
N(1) Cd(1) N(4) C(12) 129.1(12) ? . . 5_654 5_654
N(4) Cd(1) N(1) C(1) 146.6(8) ? 5_654 . . .
N(1) Cd(1) N(1) C(1) -122.6(8) ? 2_655 . 3_665 3_665
N(1) Cd(1) N(1) C(1) 55.8(8) ? 3_665 . 2_655 2_655
N(1) Cd(1) N(1) C(1) -33(5) ? 2_655 . 4_565 4_565
N(1) Cd(1) N(1) C(1) -33(5) ? 4_565 . 2_655 2_655
N(1) Cd(1) N(3) C(7) -131.2(7) ? 2_655 . . .
N(1) Cd(1) N(3) C(7) -41.2(6) ? 2_655 . . 2_655
N(1) Cd(1) N(3) C(7) 48.8(7) ? 2_655 . . 3_665
N(1) Cd(1) N(3) C(7) 138.8(6) ? 2_655 . . 4_565
N(3) Cd(1) N(1) C(1) -33.4(8) ? . . 2_655 2_655
N(1) Cd(1) N(4) C(12) -140.9(12) ? 2_655 . 5_654 5_654
N(4) Cd(1) N(1) C(1) 146.6(8) ? 5_654 . 2_655 2_655
N(1) Cd(1) N(1) C(1) -122.6(8) ? 3_665 . 4_565 4_565
N(1) Cd(1) N(1) C(1) 55.8(8) ? 4_565 . 3_665 3_665
N(1) Cd(1) N(3) C(7) 138.8(7) ? 3_665 . . .
N(1) Cd(1) N(3) C(7) -131.2(6) ? 3_665 . . 2_655
N(1) Cd(1) N(3) C(7) -41.2(7) ? 3_665 . . 3_665
N(1) Cd(1) N(3) C(7) 48.8(6) ? 3_665 . . 4_565
N(3) Cd(1) N(1) C(1) -33.4(8) ? . . 3_665 3_665
N(1) Cd(1) N(4) C(12) -50.9(12) ? 3_665 . 5_654 5_654
N(4) Cd(1) N(1) C(1) 146.6(8) ? 5_654 . 3_665 3_665
N(1) Cd(1) N(3) C(7) 48.8(7) ? 4_565 . . .
N(1) Cd(1) N(3) C(7) 138.8(6) ? 4_565 . . 2_655
N(1) Cd(1) N(3) C(7) -131.2(7) ? 4_565 . . 3_665
N(1) Cd(1) N(3) C(7) -41.2(6) ? 4_565 . . 4_565
N(3) Cd(1) N(1) C(1) -33.4(8) ? . . 4_565 4_565
N(1) Cd(1) N(4) C(12) 39.1(12) ? 4_565 . 5_654 5_654
N(4) Cd(1) N(1) C(1) 146.6(8) ? 5_654 . 4_565 4_565
N(2) Cd(2) N(2) C(3) 120(3) ? . . 3_655 3_655
N(2) Cd(2) N(2) C(3) 120(3) ? 3_655 . . .
N(2) Cd(2) N(2) C(3) 149.3(7) ? . . 10_566 10_566
N(2) Cd(2) N(2) C(3) 28.7(7) ? 10_566 . . .
N(2) Cd(2) N(2) C(3) -28.7(7) ? . . 12_646 12_646
N(2) Cd(2) N(2) C(3) -149.3(7) ? 12_646 . . .
N(2) Cd(2) N(5) C(13) -144.3(4) ? . . . .
N(2) Cd(2) N(5) C(13) 35.7(4) ? . . . 3_655
N(5) Cd(2) N(2) C(3) 119.7(7) ? . . . .
N(2) Cd(2) N(5) C(13) -125.7(3) ? . . 10_566 10_566
N(5) Cd(2) N(2) C(3) -60.3(7) ? 10_566 . . .
N(2) Cd(2) N(2) C(3) -28.7(7) ? 3_655 . 10_566 10_566
N(2) Cd(2) N(2) C(3) -149.3(7) ? 10_566 . 3_655 3_655
N(2) Cd(2) N(2) C(3) 149.3(7) ? 3_655 . 12_646 12_646
N(2) Cd(2) N(2) C(3) 28.7(7) ? 12_646 . 3_655 3_655
N(2) Cd(2) N(5) C(13) 35.7(4) ? 3_655 . . .
N(2) Cd(2) N(5) C(13) -144.3(4) ? 3_655 . . 3_655
N(5) Cd(2) N(2) C(3) 119.7(7) ? . . 3_655 3_655
N(2) Cd(2) N(5) C(13) 54.3(3) ? 3_655 . 10_566 10_566
N(5) Cd(2) N(2) C(3) -60.3(7) ? 10_566 . 3_655 3_655
N(2) Cd(2) N(2) C(3) -120(3) ? 10_566 . 12_646 12_646
N(2) Cd(2) N(2) C(3) -120(3) ? 12_646 . 10_566 10_566
N(2) Cd(2) N(5) C(13) -54.3(4) ? 10_566 . . .
N(2) Cd(2) N(5) C(13) 125.7(4) ? 10_566 . . 3_655
N(5) Cd(2) N(2) C(3) 60.3(7) ? . . 10_566 10_566
N(2) Cd(2) N(5) C(13) 144.3(3) ? 10_566 . 10_566 10_566
N(5) Cd(2) N(2) C(3) -119.7(7) ? 10_566 . 10_566 10_566
N(2) Cd(2) N(5) C(13) 125.7(4) ? 12_646 . . .
N(2) Cd(2) N(5) C(13) -54.3(4) ? 12_646 . . 3_655
N(5) Cd(2) N(2) C(3) 60.3(7) ? . . 12_646 12_646
N(2) Cd(2) N(5) C(13) -35.7(3) ? 12_646 . 10_566 10_566
N(5) Cd(2) N(2) C(3) -119.7(7) ? 10_566 . 12_646 12_646
Cd(1) N(1) C(1) C(2) -51(10) ? . . . .
Cd(2) N(2) C(3) C(2) -50(8) ? . . . .
Cd(1) N(3) C(7) C(8) 179.8(7) ? . . . .
Cd(1) N(3) C(7) C(7) 118.1(6) ? . . . 2_655
Cd(1) N(3) C(7) C(7) -118.1(6) ? . . . 4_565
Cd(1) N(3) C(7) C(8) 179.8(6) ? . . 2_655 2_655
Cd(1) N(3) C(7) C(7) -118.1(5) ? . . 2_655 .
Cd(1) N(3) C(7) C(8) 179.8(7) ? . . 3_665 3_665
Cd(1) N(3) C(7) C(7) -118.1(6) ? . . 3_665 2_655
Cd(1) N(3) C(7) C(7) 118.1(6) ? . . 3_665 4_565
Cd(1) N(3) C(7) C(8) 179.8(6) ? . . 4_565 4_565
Cd(1) N(3) C(7) C(7) 118.1(6) ? . . 4_565 .
C(7) N(3) C(7) C(8) -62.1(12) ? . . 2_655 2_655
C(7) N(3) C(7) C(8) 61.7(14) ? 2_655 . . .
C(7) N(3) C(7) C(7) 123.8(8) ? 2_655 . . 4_565
C(7) N(3) C(7) C(8) -0.2(15) ? . . 3_665 3_665
C(7) N(3) C(7) C(7) 61.9(9) ? . . 3_665 2_655
C(7) N(3) C(7) C(7) -61.9(9) ? . . 3_665 4_565
C(7) N(3) C(7) C(8) -0.2(12) ? 3_665 . . .
C(7) N(3) C(7) C(7) -61.9(9) ? 3_665 . . 2_655
C(7) N(3) C(7) C(7) 61.9(9) ? 3_665 . . 4_565
C(7) N(3) C(7) C(8) 61.7(12) ? . . 4_565 4_565
C(7) N(3) C(7) C(8) -62.1(14) ? 4_565 . . .
C(7) N(3) C(7) C(7) -123.8(8) ? 4_565 . . 2_655
C(7) N(3) C(7) C(8) -62.1(13) ? 2_655 . 3_665 3_665
C(7) N(3) C(7) C(7) -123.8(8) ? 2_655 . 3_665 4_565
C(7) N(3) C(7) C(8) 61.7(12) ? 3_665 . 2_655 2_655
C(7) N(3) C(7) C(7) 123.8(8) ? 3_665 . 2_655 .
C(7) N(3) C(7) C(8) -0.2(13) ? 2_655 . 4_565 4_565
C(7) N(3) C(7) C(7) -61.9(9) ? 2_655 . 4_565 .
C(7) N(3) C(7) C(8) -0.2(8) ? 4_565 . 2_655 2_655
C(7) N(3) C(7) C(7) 61.9(8) ? 4_565 . 2_655 .
C(7) N(3) C(7) C(8) -62.1(12) ? 3_665 . 4_565 4_565
C(7) N(3) C(7) C(7) -123.8(8) ? 3_665 . 4_565 .
C(7) N(3) C(7) C(8) 61.7(13) ? 4_565 . 3_665 3_665
C(7) N(3) C(7) C(7) 123.8(8) ? 4_565 . 3_665 2_655
Cd(1) N(4) C(12) C(11) 179.3(13) ? 5_655 . . .
Cd(1) N(4) C(12) C(12) -119.1(9) ? 5_655 . . 2_655
Cd(1) N(4) C(12) C(12) 119.1(8) ? 5_655 . . 4_565
Cd(1) N(4) C(12) C(11) 179.3(12) ? 5_655 . 2_655 2_655
Cd(1) N(4) C(12) C(12) 119.1(9) ? 5_655 . 2_655 .
Cd(1) N(4) C(12) C(11) 179.3(12) ? 5_655 . 3_665 3_665
Cd(1) N(4) C(12) C(12) 119.1(8) ? 5_655 . 3_665 2_655
Cd(1) N(4) C(12) C(12) -119.1(10) ? 5_655 . 3_665 4_565
Cd(1) N(4) C(12) C(11) 179.3(13) ? 5_655 . 4_565 4_565
Cd(1) N(4) C(12) C(12) -119.1(8) ? 5_655 . 4_565 .
C(12) N(4) C(12) C(11) 60.2(18) ? . . 2_655 2_655
C(12) N(4) C(12) C(11) -62(2) ? 2_655 . . .
C(12) N(4) C(12) C(12) -121.8(11) ? 2_655 . . 4_565
C(12) N(4) C(12) C(11) -0.7(16) ? . . 3_665 3_665
C(12) N(4) C(12) C(12) -60.9(13) ? . . 3_665 2_655
C(12) N(4) C(12) C(12) 60.9(15) ? . . 3_665 4_565
C(12) N(4) C(12) C(11) -1(2) ? 3_665 . . .
C(12) N(4) C(12) C(12) 60.9(15) ? 3_665 . . 2_655
C(12) N(4) C(12) C(12) -60.9(13) ? 3_665 . . 4_565
C(12) N(4) C(12) C(11) -61.6(18) ? . . 4_565 4_565
C(12) N(4) C(12) C(11) 60(2) ? 4_565 . . .
C(12) N(4) C(12) C(12) 121.8(11) ? 4_565 . . 2_655
C(12) N(4) C(12) C(11) 60(2) ? 2_655 . 3_665 3_665
C(12) N(4) C(12) C(12) 121.8(11) ? 2_655 . 3_665 4_565
C(12) N(4) C(12) C(11) -61.6(18) ? 3_665 . 2_655 2_655
C(12) N(4) C(12) C(12) -121.8(11) ? 3_665 . 2_655 .
C(12) N(4) C(12) C(11) -1(2) ? 2_655 . 4_565 4_565
C(12) N(4) C(12) C(12) 60.9(11) ? 2_655 . 4_565 .
C(12) N(4) C(12) C(11) -0.7(12) ? 4_565 . 2_655 2_655
C(12) N(4) C(12) C(12) -60.9(13) ? 4_565 . 2_655 .
C(12) N(4) C(12) C(11) 60.2(18) ? 3_665 . 4_565 4_565
C(12) N(4) C(12) C(12) 121.8(11) ? 3_665 . 4_565 .
C(12) N(4) C(12) C(11) -62(2) ? 4_565 . 3_665 3_665
C(12) N(4) C(12) C(12) -121.8(11) ? 4_565 . 3_665 2_655
Cd(2) N(5) C(13) C(14) 179.5(5) ? . . . .
Cd(2) N(5) C(13) C(14) 179.5(5) ? . . 3_655 3_655
C(13) N(5) C(13) C(14) -0.5(9) ? . . 3_655 3_655
C(13) N(5) C(13) C(14) -0.5(7) ? 3_655 . . .
N(1) C(1) C(2) C(3) 177(6) ? . . . .
N(1) C(1) C(2) C(4) -3(6) ? . . . .
C(1) C(2) C(3) N(2) -175(6) ? . . . .
C(1) C(2) C(4) C(5) -0.8(7) ? . . . .
C(1) C(2) C(4) C(6) 179.5(4) ? . . . .
C(3) C(2) C(4) C(5) 179.4(4) ? . . . .
C(3) C(2) C(4) C(6) -0.2(6) ? . . . .
C(4) C(2) C(3) N(2) 5(6) ? . . . .
C(2) C(4) C(5) C(6) 179.4(4) ? . . . 9_766
C(2) C(4) C(6) C(5) -179.4(4) ? . . . 9_766
C(5) C(4) C(6) C(5) 0.9(7) ? . . . 9_766
C(6) C(4) C(5) C(6) -0.9(7) ? . . . 9_766
C(4) C(5) C(6) C(4) 1.0(8) ? . . 9_766 9_766
N(3) C(7) C(7) C(8) 134.2(9) ? . . 2_655 2_655
N(3) C(7) C(7) C(8) -134.5(11) ? . . 4_565 4_565
N(3) C(7) C(8) C(9) 0.5(14) ? . . . .
N(3) C(7) C(8) C(8) -44.7(14) ? . . . 2_655
N(3) C(7) C(8) C(8) 45.4(15) ? . . . 4_565
C(7) C(7) C(7) N(3) 41.8(6) ? 2_655 . 4_565 .
C(7) C(7) C(7) C(8) -92.7(9) ? 2_655 . 4_565 4_565
C(7) C(7) C(7) N(3) -41.8(6) ? 4_565 . 2_655 .
C(7) C(7) C(7) C(8) 92.4(8) ? 4_565 . 2_655 2_655
C(7) C(7) C(8) C(9) 45.4(12) ? 2_655 . . .
C(7) C(7) C(8) C(8) 0.2(6) ? 2_655 . . 2_655
C(7) C(7) C(8) C(8) 90.3(9) ? 2_655 . . 4_565
C(8) C(7) C(7) N(3) -134.5(9) ? . . 2_655 .
C(8) C(7) C(7) C(8) -0.3(7) ? . . 2_655 2_655
C(7) C(7) C(8) C(9) -44.7(14) ? 4_565 . . .
C(7) C(7) C(8) C(8) -89.9(9) ? 4_565 . . 2_655
C(7) C(7) C(8) C(8) 0.2(7) ? 4_565 . . 4_565
C(8) C(7) C(7) N(3) 134.2(11) ? . . 4_565 .
C(8) C(7) C(7) C(8) -0.3(9) ? . . 4_565 4_565
C(7) C(8) C(8) C(7) -0.3(6) ? . . 2_655 2_655
C(7) C(8) C(8) C(9) 128.5(9) ? . . 2_655 .
C(7) C(8) C(8) C(7) -0.3(8) ? . . 4_565 4_565
C(7) C(8) C(8) C(9) -128.8(11) ? . . 4_565 .
C(7) C(8) C(9) C(8) -62.4(12) ? . . . 2_655
C(7) C(8) C(9) C(8) -0.2(13) ? . . . 3_665
C(7) C(8) C(9) C(8) 62.0(12) ? . . . 4_565
C(7) C(8) C(9) C(10) 179.8(6) ? . . . .
C(8) C(8) C(8) C(7) 87.3(9) ? 2_655 . 4_565 4_565
C(8) C(8) C(8) C(9) -41.2(6) ? 2_655 . 4_565 .
C(8) C(8) C(8) C(7) -87.6(8) ? 4_565 . 2_655 2_655
C(8) C(8) C(8) C(9) 41.2(6) ? 4_565 . 2_655 .
C(8) C(8) C(9) C(8) 62.2(9) ? 2_655 . . 3_665
C(8) C(8) C(9) C(8) 124.5(8) ? 2_655 . . 4_565
C(8) C(8) C(9) C(10) -117.8(5) ? 2_655 . . .
C(9) C(8) C(8) C(7) -128.8(9) ? . . 2_655 2_655
C(8) C(8) C(9) C(8) -124.5(8) ? 4_565 . . 2_655
C(8) C(8) C(9) C(8) -62.2(9) ? 4_565 . . 3_665
C(8) C(8) C(9) C(10) 117.8(6) ? 4_565 . . .
C(9) C(8) C(8) C(7) 128.5(11) ? . . 4_565 4_565
C(8) C(9) C(10) C(11) 147.2(12) ? . . . .
C(8) C(9) C(10) C(11) -122.8(11) ? . . . 2_655
C(8) C(9) C(10) C(11) -32.8(13) ? . . . 3_665
C(8) C(9) C(10) C(11) 57.2(11) ? . . . 4_565
C(8) C(9) C(10) C(11) 57.2(12) ? 2_655 . . .
C(8) C(9) C(10) C(11) 147.2(10) ? 2_655 . . 2_655
C(8) C(9) C(10) C(11) -122.8(12) ? 2_655 . . 3_665
C(8) C(9) C(10) C(11) -32.8(10) ? 2_655 . . 4_565
C(8) C(9) C(10) C(11) -32.8(12) ? 3_665 . . .
C(8) C(9) C(10) C(11) 57.2(11) ? 3_665 . . 2_655
C(8) C(9) C(10) C(11) 147.2(13) ? 3_665 . . 3_665
C(8) C(9) C(10) C(11) -122.8(11) ? 3_665 . . 4_565
C(8) C(9) C(10) C(11) -122.8(12) ? 4_565 . . .
C(8) C(9) C(10) C(11) -32.8(10) ? 4_565 . . 2_655
C(8) C(9) C(10) C(11) 57.2(12) ? 4_565 . . 3_665
C(8) C(9) C(10) C(11) 147.2(10) ? 4_565 . . 4_565
C(9) C(10) C(11) C(12) 179.4(12) ? . . . .
C(9) C(10) C(11) C(11) 118.2(8) ? . . . 2_655
C(9) C(10) C(11) C(11) -118.2(8) ? . . . 4_565
C(9) C(10) C(11) C(12) 179.4(11) ? . . 2_655 2_655
C(9) C(10) C(11) C(11) -118.2(8) ? . . 2_655 .
C(9) C(10) C(11) C(12) 179.4(10) ? . . 3_665 3_665
C(9) C(10) C(11) C(11) -118.2(8) ? . . 3_665 2_655
C(9) C(10) C(11) C(11) 118.2(9) ? . . 3_665 4_565
C(9) C(10) C(11) C(12) 179.4(11) ? . . 4_565 4_565
C(9) C(10) C(11) C(11) 118.2(7) ? . . 4_565 .
C(11) C(10) C(11) C(12) -62.5(16) ? . . 2_655 2_655
C(11) C(10) C(11) C(12) 61.2(19) ? 2_655 . . .
C(11) C(10) C(11) C(11) 123.7(10) ? 2_655 . . 4_565
C(11) C(10) C(11) C(12) -1(2) ? . . 3_665 3_665
C(11) C(10) C(11) C(11) 61.8(13) ? . . 3_665 2_655
C(11) C(10) C(11) C(11) -61.8(14) ? . . 3_665 4_565
C(11) C(10) C(11) C(12) -0.6(15) ? 3_665 . . .
C(11) C(10) C(11) C(11) -61.8(14) ? 3_665 . . 2_655
C(11) C(10) C(11) C(11) 61.8(13) ? 3_665 . . 4_565
C(11) C(10) C(11) C(12) 61.2(16) ? . . 4_565 4_565
C(11) C(10) C(11) C(12) -62.5(19) ? 4_565 . . .
C(11) C(10) C(11) C(11) -123.7(10) ? 4_565 . . 2_655
C(11) C(10) C(11) C(12) -62(2) ? 2_655 . 3_665 3_665
C(11) C(10) C(11) C(11) -123.7(10) ? 2_655 . 3_665 4_565
C(11) C(10) C(11) C(12) 61.2(16) ? 3_665 . 2_655 2_655
C(11) C(10) C(11) C(11) 123.7(10) ? 3_665 . 2_655 .
C(11) C(10) C(11) C(12) -0.6(11) ? 2_655 . 4_565 4_565
C(11) C(10) C(11) C(11) -61.8(11) ? 2_655 . 4_565 .
C(11) C(10) C(11) C(12) -0.6(19) ? 4_565 . 2_655 2_655
C(11) C(10) C(11) C(11) 61.8(12) ? 4_565 . 2_655 .
C(11) C(10) C(11) C(12) -62.5(16) ? 3_665 . 4_565 4_565
C(11) C(10) C(11) C(11) -123.7(10) ? 3_665 . 4_565 .
C(11) C(10) C(11) C(12) 61(2) ? 4_565 . 3_665 3_665
C(11) C(10) C(11) C(11) 123.7(10) ? 4_565 . 3_665 2_655
C(10) C(11) C(11) C(12) 129.9(17) ? . . 2_655 2_655
C(10) C(11) C(11) C(12) -130.7(12) ? . . 4_565 4_565
C(10) C(11) C(12) N(4) 1(2) ? . . . .
C(10) C(11) C(12) C(12) -44(2) ? . . . 2_655
C(10) C(11) C(12) C(12) 46(2) ? . . . 4_565
C(11) C(11) C(11) C(10) 41.9(6) ? 2_655 . 4_565 .
C(11) C(11) C(11) C(12) -88.8(10) ? 2_655 . 4_565 4_565
C(11) C(11) C(11) C(10) -41.9(7) ? 4_565 . 2_655 .
C(11) C(11) C(11) C(12) 88.1(14) ? 4_565 . 2_655 2_655
C(11) C(11) C(12) N(4) 46(2) ? 2_655 . . .
C(11) C(11) C(12) C(12) 0.7(14) ? 2_655 . . 2_655
C(11) C(11) C(12) C(12) 90.7(14) ? 2_655 . . 4_565
C(12) C(11) C(11) C(10) -130.7(17) ? . . 2_655 .
C(12) C(11) C(11) C(12) -0.8(15) ? . . 2_655 2_655
C(11) C(11) C(12) N(4) -44(2) ? 4_565 . . .
C(11) C(11) C(12) C(12) -89.4(15) ? 4_565 . . 2_655
C(11) C(11) C(12) C(12) 0.7(11) ? 4_565 . . 4_565
C(12) C(11) C(11) C(10) 129.9(12) ? . . 4_565 .
C(12) C(11) C(11) C(12) -0.8(13) ? . . 4_565 4_565
N(4) C(12) C(12) C(11) -135.4(18) ? . . 2_655 2_655
N(4) C(12) C(12) C(11) 134.6(13) ? . . 4_565 4_565
C(11) C(12) C(12) N(4) 134.6(18) ? . . 2_655 .
C(11) C(12) C(12) C(11) -0.8(16) ? . . 2_655 2_655
C(11) C(12) C(12) N(4) -135.4(12) ? . . 4_565 .
C(11) C(12) C(12) C(11) -0.8(13) ? . . 4_565 4_565
C(12) C(12) C(12) N(4) -43.4(7) ? 2_655 . 4_565 .
C(12) C(12) C(12) C(11) 91.2(11) ? 2_655 . 4_565 4_565
C(12) C(12) C(12) N(4) 43.4(8) ? 4_565 . 2_655 .
C(12) C(12) C(12) C(11) -91.9(15) ? 4_565 . 2_655 2_655
N(5) C(13) C(14) C(15) 1.0(11) ? . . . .
C(13) C(14) C(15) C(14) -0.5(9) ? . . . 3_655
C(13) C(14) C(15) C(15) 179.5(5) ? . . . 14_666
C(14) C(15) C(15) C(14) 27.5(5) ? . . 14_666 14_666
C(14) C(15) C(15) C(14) -152.5(5) ? 3_655 . 14_666 14_666

loop_
_geom_contact_atom_site_label_1
_geom_contact_atom_site_label_2
_geom_contact_distance
_geom_contact_publ_flag
_geom_contact_site_symmetry_1
_geom_contact_site_symmetry_2
Cd(1) C(12) 3.183(13) ? . 6_554
Cd(1) C(12) 3.183(12) ? . 7_564
Cd(1) C(12) 3.183(13) ? . 8_664
O(1) O(2) 2.58(3) ? . 14_665
O(1) O(3) 2.89(3) ? . .
O(1) C(8) 3.11(3) ? . 6_554
O(1) C(17) 3.41(4) ? . .
O(1) C(17) 3.57(4) ? . 4_565
O(1) C(18) 3.54(4) ? . 14_665
O(2) O(1) 2.58(3) ? . 14_665
O(2) O(4) 2.64(2) ? . 2_555
O(2) C(19) 3.36(3) ? . 2_555
O(3) O(1) 2.89(3) ? . .
O(3) O(4) 2.54(3) ? . 14_665
O(4) O(2) 2.64(2) ? . 4_555
O(4) O(3) 2.54(3) ? . 14_665
O(4) C(17) 3.42(4) ? . 14_665
N(1) C(12) 3.546(16) ? . 7_564
N(1) C(12) 3.443(15) ? . 8_664
N(4) N(1) 3.277(6) ? . 6_555
N(4) N(1) 3.277(6) ? . 7_565
N(4) N(1) 3.277(6) ? . 8_665
C(5) C(16) 3.53(5) ? . 5_655
C(6) C(16) 3.46(5) ? . 13_565
C(8) O(1) 3.11(2) ? . 6_555
C(8) C(16) 3.35(4) ? . 6_555
C(12) N(1) 3.546(16) ? . 7_565
C(12) N(1) 3.443(14) ? . 8_665
C(15) C(14) 2.506(8) ? . 16_546
C(16) C(5) 3.53(5) ? . 5_654
C(16) C(6) 3.46(5) ? . 13_465
C(16) C(8) 3.35(4) ? . 6_554
C(16) C(17) 3.39(5) ? . 4_565
C(17) O(1) 3.41(4) ? . .
C(17) O(1) 3.57(4) ? . 2_655
C(17) O(4) 3.42(4) ? . 14_665
C(17) C(16) 3.39(5) ? . 2_655
C(18) O(1) 3.54(4) ? . 14_665
C(19) O(2) 3.36(3) ? . 4_555
Cd(1) H(6) 3.166 ? . 6_554
Cd(1) H(6) 3.166 ? . 7_564
Cd(1) H(6) 3.166 ? . 8_664
O(1) H(4) 2.165 ? . 6_554
O(1) H(5) 3.015 ? . 8_664
O(2) H(8) 3.117 ? . 8_564
O(2) H(8) 2.857 ? . 11_456
O(3) H(4) 3.310 ? . 6_554
O(3) H(5) 2.764 ? . 8_664
O(4) H(5) 3.237 ? . 11_446
O(4) H(6) 3.193 ? . 11_446
N(1) H(6) 3.164 ? . 7_564
N(1) H(6) 2.954 ? . 8_664
C(15) H(8) 2.684 ? . 16_546
C(16) H(2) 3.599 ? . 13_465
C(16) H(3) 3.104 ? . 6_554
C(16) H(4) 2.592 ? . 6_554
C(16) H(7) 3.188 ? . 8_564
C(17) H(4) 3.541 ? . 6_554
C(17) H(5) 3.511 ? . 8_664
C(18) H(6) 3.520 ? . 11_446
C(19) H(1) 3.489 ? . 13_465
C(19) H(2) 3.494 ? . 5_654
C(19) H(6) 3.470 ? . 11_446
H(1) C(19) 3.489 ? . 13_565
H(2) C(16) 3.599 ? . 13_565
H(2) C(19) 3.494 ? . 5_655
H(3) C(16) 3.104 ? . 6_555
H(4) O(1) 2.165 ? . 6_555
H(4) O(3) 3.310 ? . 6_555
H(4) C(16) 2.592 ? . 6_555
H(4) C(17) 3.541 ? . 6_555
H(5) O(1) 3.015 ? . 8_665
H(5) O(3) 2.764 ? . 8_665
H(5) O(4) 3.237 ? . 11_556
H(5) C(17) 3.511 ? . 8_665
H(6) O(4) 3.193 ? . 11_556
H(6) N(1) 3.164 ? . 7_565
H(6) N(1) 2.954 ? . 8_665
H(6) C(18) 3.520 ? . 11_556
H(6) C(19) 3.470 ? . 11_556
H(7) C(16) 3.188 ? . 8_655
H(8) O(2) 3.117 ? . 8_655
H(8) O(2) 2.857 ? . 11_546


#==============================================================================

#===END

data_General
_audit_creation_date                  '2010-07-10'
_audit_creation_method                'by CrystalStructure 3.8'
_audit_update_record                   ?

#==============================================================================

# PROCESSING SUMMARY (IUCr Office Use Only)

_journal_date_recd_electronic     ?
_journal_date_from_coeditor       ?
_journal_date_accepted            ?
_journal_coeditor_code            ?

#==============================================================================

# SUBMISSION DETAILS

_publ_contact_author_name             'Susumu Kitagawa'
_publ_contact_author_address          
;                                      Department of Synthetic Chemistry 
                                       and Biological Chemistry, 
                                       Graduate School of Engineering, 
                                       Kyoto University, 
                                       Katsura, Kyoto 615-8510, Japan 
;
_publ_contact_author_email            'kitagawa@sbchem.kyoto-u.ac.jp'
_publ_contact_author_fax              '+81-75-383-2732'
_publ_contact_author_phone            '+81-75-383-2733'
_publ_contact_letter
;
    ENTER TEXT OF LETTER
;
_publ_requested_journal               'ENTER JOURNAL NAME HERE'
_publ_requested_category              'CHOOSE FI FM FO CI CM CO or AD'
_publ_requested_coeditor_name          ?

#==============================================================================

# TITLE AND AUTHOR LIST

_publ_section_title
;
  Synthesis of TCNQ-based porous coordination polymers with several metal ions  
  and guest dependent properties
;
_publ_section_title_footnote
;
    ENTER FOOTNOTE TO TITLE OF PAPER
;
loop_
_publ_author_name
_publ_author_footnote
_publ_author_address
' Satoru Shimomura '
;
  FIRST AUTHORS FOOTNOTES
;
; Department of Synthetic Chemistry and Biological Chemistry, 
  Graduate School of Engineering, 
  Kyoto University, 
  Katsura, Kyoto 615-8510, Japan
;
_publ_section_synopsis
;
  ENTER SYNOPSIS
;

#==============================================================================

# TEXT

_publ_section_abstract
;
    ENTER ABSTRACT
;
_publ_section_comment
;
    ENTER TEXT
;
_publ_section_references
;
    ENTER OTHER REFERENCES

    Rigaku Americas and Rigaku Corporation. (2007).
    CrystalStructure (Version 3.8). 
    Single Crystal Structure Analysis Software.
    Rigaku Americas, 9009 TX, USA 77381-5209.
    Rigaku, Tokyo 196-8666, Japan.

    Burla, M.C., Camalli, M., Carrozzini, B., Cascarano, G.L., 
    Giacovazzo, C., Polidori, G., Spagna., R. 
    (2003). 
    SIR2002

    Carruthers, J.R., Rollett,J.S., Betteridge, P.W.,
	 Kinna, D., Pearce, L., Larsen, A., and Gabe, E.(1999)
    CRYSTALS Issue 11, Chemical Crystallography Laboratory, Oxford, UK.

    Carruthers, J.R. and Watkin, D.J. (1979), Acta Cryst, A35, 698-699

;
_publ_section_figure_captions
;
    ENTER FIGURE CAPTIONS
;
_publ_section_exptl_prep
;
    ENTER COMPOUND PREPARATION DETAILS
;
_publ_section_exptl_refinement
;
    ENTER SPECIAL DETAILS OF THE REFINEMENT
;

#==============================================================================

data___091026_FeTb_ani_1

#==============================================================================

# CHEMICAL DATA

_chemical_formula_sum                  'C22 H12 Fe N6 '
_chemical_formula_moiety               'C22 H12 Fe N6 '
_chemical_formula_weight               416.22
_chemical_melting_point                ?

#==============================================================================

# CRYSTAL DATA
_symmetry_cell_setting                 tetragonal
_symmetry_space_group_name_H-M        'I 4/m c m'
_symmetry_space_group_name_Hall       '-I 4 2c'
_symmetry_Int_Tables_number            140
loop_
_symmetry_equiv_pos_site_id
_symmetry_equiv_pos_as_xyz
1   '+X,+Y,+Z'
2   '-Y,+X,+Z'
3   '-X,-Y,+Z'
4   '+Y,-X,+Z'
5   '-X,+Y,1/2+Z'
6   '+Y,+X,1/2+Z'
7   '+X,-Y,1/2+Z'
8   '-Y,-X,1/2+Z'
9   '-X,-Y,-Z'
10  '+Y,-X,-Z'
11  '+X,+Y,-Z'
12  '-Y,+X,-Z'
13  '+X,-Y,1/2-Z'
14  '-Y,-X,1/2-Z'
15  '-X,+Y,1/2-Z'
16  '+Y,+X,1/2-Z'
17  '1/2+X,1/2+Y,1/2+Z'
18  '1/2-Y,1/2+X,1/2+Z'
19  '1/2-X,1/2-Y,1/2+Z'
20  '1/2+Y,1/2-X,1/2+Z'
21  '1/2-X,1/2+Y,+Z'
22  '1/2+Y,1/2+X,+Z'
23  '1/2+X,1/2-Y,+Z'
24  '1/2-Y,1/2-X,+Z'
25  '1/2-X,1/2-Y,1/2-Z'
26  '1/2+Y,1/2-X,1/2-Z'
27  '1/2+X,1/2+Y,1/2-Z'
28  '1/2-Y,1/2+X,1/2-Z'
29  '1/2+X,1/2-Y,-Z'
30  '1/2-Y,1/2-X,-Z'
31  '1/2-X,1/2+Y,-Z'
32  '1/2+Y,1/2+X,-Z'

#------------------------------------------------------------------------------

_cell_length_a                         12.377(13)
_cell_length_b                         12.377(13)
_cell_length_c                         22.90(2)
_cell_angle_alpha                      90.0000
_cell_angle_beta                       90.0000
_cell_angle_gamma                      90.0000
_cell_volume                           3508(6)
_cell_formula_units_Z                  4
_cell_measurement_reflns_used          4143
_cell_measurement_theta_min            2.9
_cell_measurement_theta_max            27.5
_cell_measurement_temperature          213.1

#------------------------------------------------------------------------------

_exptl_crystal_description            'prism'
_exptl_crystal_colour                 'colorless'
_exptl_crystal_size_max                0.20
_exptl_crystal_size_mid                0.20
_exptl_crystal_size_min                0.20
_exptl_crystal_density_diffrn          0.788
_exptl_crystal_density_meas            ?
_exptl_crystal_density_method         'not measured'
_exptl_crystal_F_000                   848.00
_exptl_absorpt_coefficient_mu          0.441
_exptl_absorpt_correction_type         multi-scan
_exptl_absorpt_process_details         
'Jacobson, R. (1998) Private communication'
_exptl_absorpt_correction_T_min        0.752
_exptl_absorpt_correction_T_max        0.916

#==============================================================================

# EXPERIMENTAL DATA

_diffrn_radiation_type                'Mo K\a'
_diffrn_radiation_wavelength           0.71070
_diffrn_measurement_device_type       'Rigaku Mercury'
_diffrn_measurement_method             \w
_diffrn_detector_area_resol_mean       7.31
_diffrn_reflns_number                  11913
_diffrn_reflns_av_R_equivalents        0.044
_diffrn_reflns_theta_max               27.50
_diffrn_measured_fraction_theta_max    0.995
_diffrn_reflns_theta_full              27.50
_diffrn_measured_fraction_theta_full   0.995
_diffrn_reflns_limit_h_min             -15
_diffrn_reflns_limit_h_max             15
_diffrn_reflns_limit_k_min             -16
_diffrn_reflns_limit_k_max             15
_diffrn_reflns_limit_l_min             -28
_diffrn_reflns_limit_l_max             29
_diffrn_ambient_temperature            213.1

#==============================================================================

# REFINEMENT DATA

_refine_special_details
;
    Refinement was performed using reflections with F^2^ > 2.0 sigma(F^2^).
    The weighted R-factor(wR), goodness of fit (S) and R-factor (gt) are 
    based on F, with F set to zero for negative F. The threshold expression of
    F^2^ > 2.0 sigma(F^2^) is used only for calculating R-factor (gt).
;
_reflns_number_total                   1103
_reflns_number_gt                      820
_reflns_threshold_expression           F^2^>2.0\s(F^2^)
_refine_ls_structure_factor_coef       F
_refine_ls_R_factor_gt                 0.0853
_refine_ls_wR_factor_ref               0.0806
_refine_ls_hydrogen_treatment          refall
_refine_ls_number_reflns               823
_refine_ls_number_parameters           57
_refine_ls_goodness_of_fit_ref         0.841
_refine_ls_weighting_scheme            calc
_refine_ls_weighting_details
;
    Chebychev polynomial with 3 parameters (Carruthers & Watkin, 1979)
    14.0699    12.4066    11.3399
;
_refine_ls_shift/su_max                0.0000
_refine_diff_density_max               1.49
_refine_diff_density_min               -0.43
_refine_ls_extinction_method           none
_refine_ls_extinction_coef             ?

loop_
_atom_type_symbol
_atom_type_description
_atom_type_scat_dispersion_real
_atom_type_scat_dispersion_imag
_atom_type_scat_source
  'C' 'C'  0.003 0.002 
;
International Tables for Crystallography
(1992, Vol. C, Tables 4.2.6.8 and 6.1.1.4)
;
  'H' 'H'  0.000 0.000 
;
International Tables for Crystallography
(1992, Vol. C, Table 6.1.1.4)
;
  'N' 'N'  0.006 0.003 
;
International Tables for Crystallography
(1992, Vol. C, Tables 4.2.6.8 and 6.1.1.4)
;
  'Fe' 'Fe'  0.346 0.844 
;
International Tables for Crystallography
(1992, Vol. C, Tables 4.2.6.8 and 6.1.1.4)
;

#==============================================================================

# ATOMIC COORDINATES AND THERMAL PARAMETERS

loop_
_atom_site_label
_atom_site_type_symbol
_atom_site_fract_x
_atom_site_fract_y
_atom_site_fract_z
_atom_site_U_iso_or_equiv
_atom_site_adp_type
_atom_site_occupancy
_atom_site_symmetry_multiplicity
_atom_site_calc_flag
_atom_site_refinement_flags
_atom_site_disorder_assembly
_atom_site_disorder_group
 Fe(1) Fe 0.0000 0.0000 0.5000 0.0238(2) Uani 1.00 8 d S . .
 N(1) N 0.1390(2) 0.1027(2) 0.5000 0.0372(6) Uani 1.00 2 d S . .
 N(2) N 0.0000 0.0000 0.40400(17) 0.0356(7) Uani 1.00 4 d S . .
 C(1) C 0.2265(2) 0.1353(2) 0.5000 0.0339(7) Uani 1.00 2 d S . .
 C(2) C 0.3349(2) 0.1651(2) 0.5000 0.0371(9) Uani 1.00 4 d S . .
 C(3) C 0.4187(2) 0.0813(2) 0.5000 0.0398(8) Uani 1.00 4 d S . .
 C(4) C 0.3921(3) -0.0277(3) 0.500000(10) 0.0531(10) Uani 1.00 2 d S . .
 C(5) C 0.0856(5) -0.0286(8) 0.3746(2) 0.0671(15) Uani 0.50 1 d P . .
 C(6) C 0.0905(6) -0.0316(8) 0.3139(2) 0.0724(18) Uani 0.50 1 d P . .
 C(7) C 0.0000 0.0000 0.2825(2) 0.0467(10) Uani 1.00 4 d S . .
 H(1) H 0.3182 -0.0486 0.5000 0.064 Uiso 1.00 2 c R . .
 H(2) H 0.1484 -0.0486 0.3957 0.081 Uiso 0.50 1 c R . .
 H(3) H 0.1542 -0.0542 0.2943 0.087 Uiso 0.50 1 c R . .


loop_
_atom_site_aniso_label
_atom_site_aniso_U_11
_atom_site_aniso_U_22
_atom_site_aniso_U_33
_atom_site_aniso_U_12
_atom_site_aniso_U_13
_atom_site_aniso_U_23
 Fe(1) 0.0175(3) 0.0175(3) 0.0365(5) 0.0000 0.0000 0.0000
 N(1) 0.0234(11) 0.0254(12) 0.0628(15) -0.0057(9) 0.0000 0.0000
 N(2) 0.0362(13) 0.0362(13) 0.0344(17) 0.0000 0.0000 0.0000
 C(1) 0.0303(15) 0.0223(13) 0.0490(15) -0.0024(10) 0.0000 0.0000
 C(2) 0.0230(12) 0.0230(12) 0.065(3) -0.0021(14) 0.0000 0.0000
 C(3) 0.0249(12) 0.0249(12) 0.069(2) 0.0007(15) 0.0000 0.0000
 C(4) 0.0212(16) 0.0303(15) 0.108(3) -0.0075(13) 0.0000 0.0000
 C(5) 0.049(3) 0.116(4) 0.036(2) 0.024(3) -0.002(2) -0.001(3)
 C(6) 0.053(3) 0.125(4) 0.039(2) 0.025(4) 0.002(2) -0.004(4)
 C(7) 0.050(2) 0.050(2) 0.041(2) 0.0000 0.0000 0.0000

#==============================================================================

_computing_data_collection            'CrystalClear'
_computing_cell_refinement            'CrystalClear'
_computing_data_reduction             'CrystalStructure'
_computing_structure_solution         'SIR2002'
_computing_structure_refinement       'CRYSTALS'
_computing_publication_material       'CrystalStructure 3.8'
_computing_molecular_graphics          ?

#==============================================================================

# MOLECULAR GEOMETRY

_geom_special_details
;
    ENTER SPECIAL DETAILS OF THE MOLECULAR GEOMETRY
;

loop_
_geom_bond_atom_site_label_1
_geom_bond_atom_site_label_2
_geom_bond_distance
_geom_bond_publ_flag
_geom_bond_site_symmetry_1
_geom_bond_site_symmetry_2
Fe(1) N(1) 2.139(2) yes . .
Fe(1) N(1) 2.139(2) yes . 2_555
Fe(1) N(1) 2.139(2) yes . 3_555
Fe(1) N(1) 2.139(2) yes . 4_555
Fe(1) N(2) 2.198(3) yes . .
Fe(1) N(2) 2.198(3) yes . 9_556
N(1) C(1) 1.155(3) yes . .
N(2) C(5) 1.305(7) yes . .
N(2) C(5) 1.305(9) yes . 2_555
N(2) C(5) 1.305(7) yes . 3_555
N(2) C(5) 1.305(9) yes . 4_555
C(1) C(2) 1.392(4) yes . .
C(2) C(3) 1.468(3) yes . .
C(3) C(4) 1.389(4) yes . .
C(3) C(4) 1.389(4) yes . 24_555
C(4) C(4) 1.403(5) yes . 22_545
C(5) C(5) 1.580(13) yes . 2_555
C(5) C(5) 1.580(11) yes . 4_555
C(5) C(6) 1.391(8) yes . .
C(6) C(6) 1.678(14) yes . 2_555
C(6) C(6) 1.678(12) yes . 4_555
C(6) C(7) 1.388(8) yes . .
C(7) C(7) 1.487(7) yes . 13_555
C(4) H(1) 0.950 no . .
C(5) H(2) 0.949 no . .
C(6) H(3) 0.950 no . .

loop_
_geom_angle_atom_site_label_1
_geom_angle_atom_site_label_2
_geom_angle_atom_site_label_3
_geom_angle
_geom_angle_publ_flag
_geom_angle_site_symmetry_1
_geom_angle_site_symmetry_2
_geom_angle_site_symmetry_3
N(1) Fe(1) N(1) 90.00(10) yes . . 2_555
N(1) Fe(1) N(1) 180.00(10) yes . . 3_555
N(1) Fe(1) N(1) 90.00(10) yes . . 4_555
N(1) Fe(1) N(2) 90.0000 yes . . .
N(1) Fe(1) N(2) 90.0000 yes . . 9_556
N(1) Fe(1) N(1) 90.00(10) yes 2_555 . 3_555
N(1) Fe(1) N(1) 180.00(9) yes 2_555 . 4_555
N(1) Fe(1) N(2) 90.0000 yes 2_555 . .
N(1) Fe(1) N(2) 90.0000 yes 2_555 . 9_556
N(1) Fe(1) N(1) 90.00(10) yes 3_555 . 4_555
N(1) Fe(1) N(2) 90.0000 yes 3_555 . .
N(1) Fe(1) N(2) 90.0000 yes 3_555 . 9_556
N(1) Fe(1) N(2) 90.0000 yes 4_555 . .
N(1) Fe(1) N(2) 90.0000 yes 4_555 . 9_556
N(2) Fe(1) N(2) 180.0000 yes . . 9_556
Fe(1) N(1) C(1) 163.9(2) yes . . .
Fe(1) N(2) C(5) 121.1(3) yes . . .
Fe(1) N(2) C(5) 121.1(3) yes . . 2_555
Fe(1) N(2) C(5) 121.1(3) yes . . 3_555
Fe(1) N(2) C(5) 121.1(3) yes . . 4_555
C(5) N(2) C(5) 74.5(5) yes . . 2_555
C(5) N(2) C(5) 117.8(4) yes . . 3_555
C(5) N(2) C(5) 74.5(5) yes . . 4_555
C(5) N(2) C(5) 74.5(5) yes 2_555 . 3_555
C(5) N(2) C(5) 117.8(5) yes 2_555 . 4_555
C(5) N(2) C(5) 74.5(5) yes 3_555 . 4_555
N(1) C(1) C(2) 175.0(3) yes . . .
C(1) C(2) C(1) 120.8(2) yes . . 24_555
C(1) C(2) C(3) 119.6(2) yes . . .
C(1) C(2) C(3) 119.6(2) yes 24_555 . .
C(2) C(3) C(4) 121.3(2) yes . . .
C(2) C(3) C(4) 121.3(2) yes . . 24_555
C(4) C(3) C(4) 117.5(2) yes . . 24_555
C(3) C(4) C(4) 121.3(3) yes . . 22_545
N(2) C(5) C(5) 52.7(4) yes . . 2_555
N(2) C(5) C(5) 52.7(4) yes . . 4_555
N(2) C(5) C(6) 124.0(6) yes . . .
C(5) C(5) C(5) 90.0(6) yes 2_555 . 4_555
C(5) C(5) C(6) 92.5(6) yes 2_555 . .
C(5) C(5) C(6) 91.5(5) yes 4_555 . .
C(5) C(6) C(6) 87.5(6) yes . . 2_555
C(5) C(6) C(6) 88.4(5) yes . . 4_555
C(5) C(6) C(7) 118.4(6) yes . . .
C(6) C(6) C(6) 90.0(6) yes 2_555 . 4_555
C(6) C(6) C(7) 52.8(4) yes 2_555 . .
C(6) C(6) C(7) 52.8(4) yes 4_555 . .
C(6) C(7) C(6) 74.4(5) yes . . 2_555
C(6) C(7) C(6) 117.5(5) yes . . 3_555
C(6) C(7) C(6) 74.4(5) yes . . 4_555
C(6) C(7) C(7) 121.2(3) yes . . 13_555
C(6) C(7) C(6) 74.4(5) yes 2_555 . 3_555
C(6) C(7) C(6) 117.5(5) yes 2_555 . 4_555
C(6) C(7) C(7) 121.2(3) yes 2_555 . 13_555
C(6) C(7) C(6) 74.4(5) yes 3_555 . 4_555
C(6) C(7) C(7) 121.2(3) yes 3_555 . 13_555
C(6) C(7) C(7) 121.2(3) yes 4_555 . 13_555
C(3) C(4) H(1) 119.5 no . . .
C(4) C(4) H(1) 119.2 no 22_545 . .
N(2) C(5) H(2) 118.2 no . . .
C(5) C(5) H(2) 126.8 no 2_555 . .
C(5) C(5) H(2) 128.0 no 4_555 . .
C(6) C(5) H(2) 117.9 no . . .
C(5) C(6) H(3) 121.2 no . . .
C(6) C(6) H(3) 128.7 no 2_555 . .
C(6) C(6) H(3) 128.3 no 4_555 . .
C(7) C(6) H(3) 120.5 no . . .

loop_
_geom_torsion_atom_site_label_1
_geom_torsion_atom_site_label_2
_geom_torsion_atom_site_label_3
_geom_torsion_atom_site_label_4
_geom_torsion
_geom_torsion_publ_flag
_geom_torsion_site_symmetry_1
_geom_torsion_site_symmetry_2
_geom_torsion_site_symmetry_3
_geom_torsion_site_symmetry_4
N(1) Fe(1) N(2) C(5) 54.9(5) ? . . . .
N(1) Fe(1) N(2) C(5) -35.1(3) ? . . . 2_555
N(1) Fe(1) N(2) C(5) -125.1(5) ? . . . 3_555
N(1) Fe(1) N(2) C(5) 144.9(4) ? . . . 4_555
N(2) Fe(1) N(1) C(1) -90.0 ? . . . .
N(1) Fe(1) N(2) C(5) 125.1(5) ? . . 9_556 9_556
N(2) Fe(1) N(1) C(1) 90.0 ? 9_556 . . .
N(1) Fe(1) N(2) C(5) 144.9(5) ? 2_555 . . .
N(1) Fe(1) N(2) C(5) 54.9(3) ? 2_555 . . 2_555
N(1) Fe(1) N(2) C(5) -35.1(5) ? 2_555 . . 3_555
N(1) Fe(1) N(2) C(5) -125.1(4) ? 2_555 . . 4_555
N(2) Fe(1) N(1) C(1) -90.0 ? . . 2_555 2_555
N(1) Fe(1) N(2) C(5) 35.1(5) ? 2_555 . 9_556 9_556
N(2) Fe(1) N(1) C(1) 90.0 ? 9_556 . 2_555 2_555
N(1) Fe(1) N(2) C(5) -125.1(5) ? 3_555 . . .
N(1) Fe(1) N(2) C(5) 144.9(3) ? 3_555 . . 2_555
N(1) Fe(1) N(2) C(5) 54.9(5) ? 3_555 . . 3_555
N(1) Fe(1) N(2) C(5) -35.1(4) ? 3_555 . . 4_555
N(2) Fe(1) N(1) C(1) -90.0 ? . . 3_555 3_555
N(1) Fe(1) N(2) C(5) -54.9(5) ? 3_555 . 9_556 9_556
N(2) Fe(1) N(1) C(1) 90.0 ? 9_556 . 3_555 3_555
N(1) Fe(1) N(2) C(5) -35.1(5) ? 4_555 . . .
N(1) Fe(1) N(2) C(5) -125.1(3) ? 4_555 . . 2_555
N(1) Fe(1) N(2) C(5) 144.9(5) ? 4_555 . . 3_555
N(1) Fe(1) N(2) C(5) 54.9(4) ? 4_555 . . 4_555
N(2) Fe(1) N(1) C(1) -90.0 ? . . 4_555 4_555
N(1) Fe(1) N(2) C(5) -144.9(5) ? 4_555 . 9_556 9_556
N(2) Fe(1) N(1) C(1) 90.0 ? 9_556 . 4_555 4_555
Fe(1) N(2) C(5) C(6) 179.1(7) ? . . . .
Fe(1) N(2) C(5) C(5) -117.3(4) ? . . . 2_555
Fe(1) N(2) C(5) C(5) 117.3(4) ? . . . 4_555
Fe(1) N(2) C(5) C(6) 179.1(5) ? . . 2_555 2_555
Fe(1) N(2) C(5) C(5) 117.3(3) ? . . 2_555 .
Fe(1) N(2) C(5) C(6) 179.1(7) ? . . 3_555 3_555
Fe(1) N(2) C(5) C(5) 117.3(4) ? . . 3_555 2_555
Fe(1) N(2) C(5) C(5) -117.3(4) ? . . 3_555 4_555
Fe(1) N(2) C(5) C(6) 179.1(5) ? . . 4_555 4_555
Fe(1) N(2) C(5) C(5) -117.3(4) ? . . 4_555 .
C(5) N(2) C(5) C(6) 61.8(7) ? . . 2_555 2_555
C(5) N(2) C(5) C(6) -63.5(9) ? 2_555 . . .
C(5) N(2) C(5) C(5) -125.3(5) ? 2_555 . . 4_555
C(5) N(2) C(5) C(6) -0.9(10) ? . . 3_555 3_555
C(5) N(2) C(5) C(5) -62.7(6) ? . . 3_555 2_555
C(5) N(2) C(5) C(5) 62.7(6) ? . . 3_555 4_555
C(5) N(2) C(5) C(6) -0.9(12) ? 3_555 . . .
C(5) N(2) C(5) C(5) 62.7(6) ? 3_555 . . 2_555
C(5) N(2) C(5) C(5) -62.7(6) ? 3_555 . . 4_555
C(5) N(2) C(5) C(6) -63.5(7) ? . . 4_555 4_555
C(5) N(2) C(5) C(6) 61.8(9) ? 4_555 . . .
C(5) N(2) C(5) C(5) 125.3(5) ? 4_555 . . 2_555
C(5) N(2) C(5) C(6) 61.8(9) ? 2_555 . 3_555 3_555
C(5) N(2) C(5) C(5) 125.3(5) ? 2_555 . 3_555 4_555
C(5) N(2) C(5) C(6) -63.5(7) ? 3_555 . 2_555 2_555
C(5) N(2) C(5) C(5) -125.3(5) ? 3_555 . 2_555 .
C(5) N(2) C(5) C(6) -0.9(9) ? 2_555 . 4_555 4_555
C(5) N(2) C(5) C(5) 62.7(5) ? 2_555 . 4_555 .
C(5) N(2) C(5) C(6) -0.9(9) ? 4_555 . 2_555 2_555
C(5) N(2) C(5) C(5) -62.7(5) ? 4_555 . 2_555 .
C(5) N(2) C(5) C(6) 61.8(7) ? 3_555 . 4_555 4_555
C(5) N(2) C(5) C(5) 125.3(5) ? 3_555 . 4_555 .
C(5) N(2) C(5) C(6) -63.5(9) ? 4_555 . 3_555 3_555
C(5) N(2) C(5) C(5) -125.3(5) ? 4_555 . 3_555 2_555
N(2) C(5) C(5) C(6) -133.0(6) ? . . 2_555 2_555
N(2) C(5) C(5) C(6) 132.0(7) ? . . 4_555 4_555
N(2) C(5) C(6) C(7) 1.7(14) ? . . . .
N(2) C(5) C(6) C(6) 46.3(10) ? . . . 2_555
N(2) C(5) C(6) C(6) -43.7(10) ? . . . 4_555
C(5) C(5) C(5) N(2) -40.5(3) ? 2_555 . 4_555 .
C(5) C(5) C(5) C(6) 91.5(6) ? 2_555 . 4_555 4_555
C(5) C(5) C(5) N(2) 40.5(3) ? 4_555 . 2_555 .
C(5) C(5) C(5) C(6) -92.5(5) ? 4_555 . 2_555 2_555
C(5) C(5) C(6) C(7) -43.8(9) ? 2_555 . . .
C(5) C(5) C(6) C(6) 0.8(5) ? 2_555 . . 2_555
C(5) C(5) C(6) C(6) -89.2(6) ? 2_555 . . 4_555
C(6) C(5) C(5) N(2) 132.0(6) ? . . 2_555 .
C(6) C(5) C(5) C(6) -1.0(7) ? . . 2_555 2_555
C(5) C(5) C(6) C(7) 46.2(9) ? 4_555 . . .
C(5) C(5) C(6) C(6) 90.9(6) ? 4_555 . . 2_555
C(5) C(5) C(6) C(6) 0.8(7) ? 4_555 . . 4_555
C(6) C(5) C(5) N(2) -133.0(7) ? . . 4_555 .
C(6) C(5) C(5) C(6) -1.0(8) ? . . 4_555 4_555
C(5) C(6) C(6) C(5) -0.9(6) ? . . 2_555 2_555
C(5) C(6) C(6) C(7) -129.1(6) ? . . 2_555 .
C(5) C(6) C(6) C(5) -0.9(8) ? . . 4_555 4_555
C(5) C(6) C(6) C(7) 128.1(7) ? . . 4_555 .
C(5) C(6) C(7) C(6) 61.8(8) ? . . . 2_555
C(5) C(6) C(7) C(6) -0.8(9) ? . . . 3_555
C(5) C(6) C(7) C(6) -63.3(8) ? . . . 4_555
C(5) C(6) C(7) C(7) 179.2(6) ? . . . 13_555
C(6) C(6) C(6) C(5) -88.4(6) ? 2_555 . 4_555 4_555
C(6) C(6) C(6) C(7) 40.6(4) ? 2_555 . 4_555 .
C(6) C(6) C(6) C(5) 87.5(5) ? 4_555 . 2_555 2_555
C(6) C(6) C(6) C(7) -40.6(3) ? 4_555 . 2_555 .
C(6) C(6) C(7) C(6) -62.6(6) ? 2_555 . . 3_555
C(6) C(6) C(7) C(6) -125.2(5) ? 2_555 . . 4_555
C(6) C(6) C(7) C(7) 117.4(3) ? 2_555 . . 13_555
C(7) C(6) C(6) C(5) 128.1(6) ? . . 2_555 2_555
C(6) C(6) C(7) C(6) 125.2(5) ? 4_555 . . 2_555
C(6) C(6) C(7) C(6) 62.6(6) ? 4_555 . . 3_555
C(6) C(6) C(7) C(7) -117.4(4) ? 4_555 . . 13_555
C(7) C(6) C(6) C(5) -129.1(7) ? . . 4_555 4_555
C(6) C(7) C(7) C(6) -38.6(7) ? . . 13_555 13_555
C(6) C(7) C(7) C(6) 51.4(6) ? 2_555 . 13_555 13_555
C(6) C(7) C(7) C(6) 141.4(7) ? 3_555 . 13_555 13_555
C(6) C(7) C(7) C(6) -128.6(6) ? 4_555 . 13_555 13_555

loop_
_geom_contact_atom_site_label_1
_geom_contact_atom_site_label_2
_geom_contact_distance
_geom_contact_publ_flag
_geom_contact_site_symmetry_1
_geom_contact_site_symmetry_2
Fe(1) C(5) 3.082(6) ? . 10_556
Fe(1) C(5) 3.082(6) ? . 11_556
Fe(1) C(5) 3.082(6) ? . 12_556
N(1) C(5) 3.366(7) ? . 11_556
N(1) C(5) 3.188(6) ? . 12_556
C(3) C(3) 2.845(3) ? . 3_655
C(3) C(4) 2.434(4) ? . 3_655
C(4) C(3) 2.434(4) ? . 3_655
C(4) C(4) 2.758(5) ? . 3_655
C(6) C(6) 3.103(8) ? . 14_555
C(7) C(6) 2.506(8) ? . 14_555
C(7) C(6) 2.506(7) ? . 15_555
C(7) C(6) 2.506(8) ? . 16_555
Fe(1) H(2) 3.072 ? . 10_556
Fe(1) H(2) 3.072 ? . 11_556
Fe(1) H(2) 3.072 ? . 12_556
N(1) H(2) 3.037 ? . 11_556
N(1) H(2) 2.697 ? . 12_556
C(1) H(2) 3.437 ? . 11_556
C(1) H(2) 3.252 ? . 12_556
C(3) H(1) 3.281 ? . 3_655
C(6) H(3) 2.939 ? . 14_555
C(7) H(3) 2.680 ? . 14_555
C(7) H(3) 2.680 ? . 15_555
C(7) H(3) 2.680 ? . 16_555
H(1) C(3) 3.281 ? . 3_655
H(1) H(2) 3.181 ? . 11_556
H(3) C(6) 2.939 ? . 14_555
H(3) H(3) 2.678 ? . 14_555


#==============================================================================

#===END

data_General
_audit_creation_date                  '2010-07-10'
_audit_creation_method                'by CrystalStructure 3.8'
_audit_update_record                   ?

#==============================================================================

# PROCESSING SUMMARY (IUCr Office Use Only)

_journal_date_recd_electronic     ?
_journal_date_from_coeditor       ?
_journal_date_accepted            ?
_journal_coeditor_code            ?

#==============================================================================

# SUBMISSION DETAILS

_publ_contact_author_name             'Susumu Kitagawa'
_publ_contact_author_address          
;                                      Department of Synthetic Chemistry 
                                       and Biological Chemistry, 
                                       Graduate School of Engineering, 
                                       Kyoto University, 
                                       Katsura, Kyoto 615-8510, Japan 
;
_publ_contact_author_email            'kitagawa@sbchem.kyoto-u.ac.jp'
_publ_contact_author_fax              '+81-75-383-2732'
_publ_contact_author_phone            '+81-75-383-2733'
_publ_contact_letter
;
    ENTER TEXT OF LETTER
;
_publ_requested_journal               'ENTER JOURNAL NAME HERE'
_publ_requested_category              'CHOOSE FI FM FO CI CM CO or AD'
_publ_requested_coeditor_name          ?

#==============================================================================

# TITLE AND AUTHOR LIST

_publ_section_title
;
  Synthesis of TCNQ-based porous coordination polymers with several metal ions    and guest dependent properties
;
_publ_section_title_footnote
;
    ENTER FOOTNOTE TO TITLE OF PAPER
;
loop_
_publ_author_name
_publ_author_footnote
_publ_author_address
' Satoru Shimomura '
;
  FIRST AUTHORS FOOTNOTES
;
; Department of Synthetic Chemistry and Biological Chemistry, 
  Graduate School of Engineering, 
  Kyoto University, 
  Katsura, Kyoto 615-8510, Japan
;
_publ_section_synopsis
;
  ENTER SYNOPSIS
;

#==============================================================================

# TEXT

_publ_section_abstract
;
    ENTER ABSTRACT
;
_publ_section_comment
;
    ENTER TEXT
;
_publ_section_references
;
    ENTER OTHER REFERENCES

    Rigaku Americas and Rigaku Corporation. (2007).
    CrystalStructure (Version 3.8). 
    Single Crystal Structure Analysis Software.
    Rigaku Americas, 9009 TX, USA 77381-5209.
    Rigaku, Tokyo 196-8666, Japan.

    Burla, M.C., Camalli, M., Carrozzini, B., Cascarano, G.L., 
    Giacovazzo, C., Polidori, G., Spagna., R. 
    (2003). 
    SIR2002

    Carruthers, J.R., Rollett,J.S., Betteridge, P.W.,
	 Kinna, D., Pearce, L., Larsen, A., and Gabe, E.(1999)
    CRYSTALS Issue 11, Chemical Crystallography Laboratory, Oxford, UK.

    Carruthers, J.R. and Watkin, D.J. (1979), Acta Cryst, A35, 698-699

;
_publ_section_figure_captions
;
    ENTER FIGURE CAPTIONS
;
_publ_section_exptl_prep
;
    ENTER COMPOUND PREPARATION DETAILS
;
_publ_section_exptl_refinement
;
    ENTER SPECIAL DETAILS OF THE REFINEMENT
;

#==============================================================================

data___FeTb_nb_RT_a

#==============================================================================

# CHEMICAL DATA

_chemical_formula_sum                  'C22 H12 Fe N6 '
_chemical_formula_moiety               'C22 H12 Fe N6 '
_chemical_formula_weight               416.22
_chemical_melting_point                ?

#==============================================================================

# CRYSTAL DATA
_symmetry_cell_setting                 tetragonal
_symmetry_space_group_name_H-M        'P 4/n c c'
_symmetry_space_group_name_Hall       '-P 4a 2ac'
_symmetry_Int_Tables_number            130
loop_
_symmetry_equiv_pos_site_id
_symmetry_equiv_pos_as_xyz
1   '+X,+Y,+Z'
2   '1/2-Y,+X,+Z'
3   '1/2-X,1/2-Y,+Z'
4   '+Y,1/2-X,+Z'
5   '1/2-X,+Y,1/2+Z'
6   '+Y,+X,1/2+Z'
7   '+X,1/2-Y,1/2+Z'
8   '1/2-Y,1/2-X,1/2+Z'
9   '-X,-Y,-Z'
10  '1/2+Y,-X,-Z'
11  '1/2+X,1/2+Y,-Z'
12  '-Y,1/2+X,-Z'
13  '1/2+X,-Y,1/2-Z'
14  '-Y,-X,1/2-Z'
15  '-X,1/2+Y,1/2-Z'
16  '1/2+Y,1/2+X,1/2-Z'

#------------------------------------------------------------------------------

_cell_length_a                         17.4656(7)
_cell_length_b                         17.4656(7)
_cell_length_c                         23.0745(11)
_cell_angle_alpha                      90.0000
_cell_angle_beta                       90.0000
_cell_angle_gamma                      90.0000
_cell_volume                           7038.8(5)
_cell_formula_units_Z                  8
_cell_measurement_reflns_used          10035
_cell_measurement_theta_min            3.1
_cell_measurement_theta_max            27.5
_cell_measurement_temperature          293.1

#------------------------------------------------------------------------------

_exptl_crystal_description            'prism'
_exptl_crystal_colour                 'colorless'
_exptl_crystal_size_max                0.20
_exptl_crystal_size_mid                0.20
_exptl_crystal_size_min                0.20
_exptl_crystal_density_diffrn          0.785
_exptl_crystal_density_meas            ?
_exptl_crystal_density_method         'not measured'
_exptl_crystal_F_000                   1696.00
_exptl_absorpt_coefficient_mu          0.439
_exptl_absorpt_correction_type         multi-scan
_exptl_absorpt_process_details         
'Jacobson, R. (1998) Private communication'
_exptl_absorpt_correction_T_min        0.737
_exptl_absorpt_correction_T_max        0.916

#==============================================================================

# EXPERIMENTAL DATA

_diffrn_radiation_type                'Mo K\a'
_diffrn_radiation_wavelength           0.71075
_diffrn_measurement_device_type       'Rigaku Saturn'
_diffrn_measurement_method             \w
_diffrn_detector_area_resol_mean       14.63
_diffrn_reflns_number                  44118
_diffrn_reflns_av_R_equivalents        0.076
_diffrn_reflns_theta_max               27.48
_diffrn_measured_fraction_theta_max    0.995
_diffrn_reflns_theta_full              27.48
_diffrn_measured_fraction_theta_full   0.995
_diffrn_reflns_limit_h_min             -22
_diffrn_reflns_limit_h_max             22
_diffrn_reflns_limit_k_min             -22
_diffrn_reflns_limit_k_max             22
_diffrn_reflns_limit_l_min             -22
_diffrn_reflns_limit_l_max             29
_diffrn_ambient_temperature            293.1

#==============================================================================

# REFINEMENT DATA

_refine_special_details
;
    Refinement was performed using reflections with F^2^ > 2.0 sigma(F^2^).
    The weighted R-factor(wR), goodness of fit (S) and R-factor (gt) are 
    based on F, with F set to zero for negative F. The threshold expression of
    F^2^ > 2.0 sigma(F^2^) is used only for calculating R-factor (gt).
;
_reflns_number_total                   4026
_reflns_number_gt                      1878
_reflns_threshold_expression           F^2^>2.0\s(F^2^)
_refine_ls_structure_factor_coef       F
_refine_ls_R_factor_gt                 0.1776
_refine_ls_wR_factor_ref               0.2072
_refine_ls_hydrogen_treatment          refall
_refine_ls_number_reflns               1910
_refine_ls_number_parameters           196
_refine_ls_goodness_of_fit_ref         1.069
_refine_ls_weighting_scheme            calc
_refine_ls_weighting_details
;
    Chebychev polynomial with 3 parameters (Carruthers & Watkin, 1979)
    27.4414    3.0600    18.5504
;
_refine_ls_shift/su_max                0.0018
_refine_diff_density_max               1.34
_refine_diff_density_min               -1.94
_refine_ls_extinction_method           none
_refine_ls_extinction_coef             ?

loop_
_atom_type_symbol
_atom_type_description
_atom_type_scat_dispersion_real
_atom_type_scat_dispersion_imag
_atom_type_scat_source
  'C' 'C'  0.003 0.002 
;
International Tables for Crystallography
(1992, Vol. C, Tables 4.2.6.8 and 6.1.1.4)
;
  'H' 'H'  0.000 0.000 
;
International Tables for Crystallography
(1992, Vol. C, Table 6.1.1.4)
;
  'N' 'N'  0.006 0.003 
;
International Tables for Crystallography
(1992, Vol. C, Tables 4.2.6.8 and 6.1.1.4)
;
  'Fe' 'Fe'  0.346 0.844 
;
International Tables for Crystallography
(1992, Vol. C, Tables 4.2.6.8 and 6.1.1.4)
;

#==============================================================================

# ATOMIC COORDINATES AND THERMAL PARAMETERS

loop_
_atom_site_label
_atom_site_type_symbol
_atom_site_fract_x
_atom_site_fract_y
_atom_site_fract_z
_atom_site_U_iso_or_equiv
_atom_site_adp_type
_atom_site_occupancy
_atom_site_symmetry_multiplicity
_atom_site_calc_flag
_atom_site_refinement_flags
_atom_site_disorder_assembly
_atom_site_disorder_group
 Fe(1) Fe 0.7500 0.7500 0.51005(9) 0.0392(4) Uani 1.00 4 d S . .
 Fe(2) Fe 0.7500 0.2500 0.5000 0.0200(3) Uani 1.00 4 d S . .
 N(1) N 0.7280(3) 0.6298(3) 0.5095(3) 0.0370(19) Uani 1.00 1 d . . .
 N(2) N 0.7321(4) 0.3715(4) 0.5007(3) 0.048(2) Uani 1.00 1 d . . .
 N(3) N 0.7500 0.7500 0.4119(5) 0.042(2) Uani 1.00 4 d S . .
 N(4) N 0.7500 0.7500 0.6045(4) 0.039(2) Uani 1.00 4 d S . .
 N(5) N 0.7500 0.2500 0.4033(3) 0.041(2) Uani 1.00 2 d S . .
 C(1) C 0.7017(5) 0.5696(5) 0.5068(4) 0.051(3) Uani 1.00 1 d . . .
 C(2) C 0.6666(11) 0.5005(8) 0.4903(8) 0.043(5) Uani 0.50 1 d P . .
 C(3) C 0.6639(12) 0.4970(12) 0.5174(9) 0.042(5) Uani 0.50 1 d P . .
 C(4) C 0.7047(4) 0.4313(5) 0.5024(4) 0.046(2) Uani 1.00 1 d . . .
 C(5) C 0.5792(8) 0.4955(9) 0.4805(8) 0.042(5) Uani 0.50 1 d P . .
 C(6) C 0.5816(8) 0.4982(10) 0.5202(9) 0.043(5) Uani 0.50 1 d P . .
 C(7) C 0.5339(10) 0.5646(8) 0.4753(10) 0.042(5) Uani 0.50 1 d P . .
 C(8) C 0.5337(13) 0.5635(9) 0.5226(11) 0.071(8) Uani 0.50 1 d P . .
 C(9) C 0.5359(13) 0.4274(9) 0.4896(9) 0.041(6) Uani 0.50 1 d P . .
 C(10) C 0.5475(11) 0.4260(11) 0.5199(10) 0.042(6) Uani 0.50 1 d P . .
 C(11) C 0.7936(12) 0.7950(14) 0.3812(6) 0.071(8) Uani 0.50 1 d P . .
 C(12) C 0.7039(13) 0.7049(14) 0.3213(7) 0.079(9) Uani 0.50 1 d P . .
 C(13) C 0.7500 0.7500 0.2901(6) 0.045(3) Uani 1.00 4 d S . .
 C(14) C 0.7500 0.7500 0.2262(6) 0.049(3) Uani 1.00 4 d S . .
 C(15) C 0.6919(10) 0.7814(14) 0.1926(7) 0.075(6) Uani 0.50 1 d P . .
 C(16) C 0.7179(17) 0.8030(13) 0.6336(9) 0.088(8) Uani 0.50 1 d P . .
 C(17) C 0.7156(5) 0.1938(5) 0.3729(3) 0.048(2) Uani 1.00 1 d . . .
 C(18) C 0.7131(6) 0.1912(6) 0.3143(4) 0.056(2) Uani 1.00 1 d . . .
 C(19) C 0.7500 0.2500 0.2820(5) 0.056(3) Uani 1.00 2 d S . .
 H(1) H 0.8289 0.8266 0.4015 0.086 Uiso 1.00 1 c R . .
 H(2) H 0.6910 0.1538 0.3936 0.057 Uiso 1.00 1 c R . .
 H(3) H 0.6685 0.6726 0.3018 0.095 Uiso 1.00 1 c R . .
 H(4) H 0.6497 0.8047 0.2117 0.089 Uiso 1.00 1 c R . .
 H(5) H 0.6968 0.8449 0.6127 0.106 Uiso 1.00 1 c R . .
 H(6) H 0.6879 0.1507 0.2946 0.067 Uiso 1.00 1 c R . .


loop_
_atom_site_aniso_label
_atom_site_aniso_U_11
_atom_site_aniso_U_22
_atom_site_aniso_U_33
_atom_site_aniso_U_12
_atom_site_aniso_U_13
_atom_site_aniso_U_23
 Fe(1) 0.0407(9) 0.0407(9) 0.0363(11) 0.0000 0.0000 0.0000
 Fe(2) 0.0105(6) 0.0105(6) 0.0391(9) 0.0000 0.0000 0.0000
 N(1) 0.020(3) 0.024(3) 0.066(4) 0.012(2) 0.004(2) 0.003(2)
 N(2) 0.049(6) 0.026(3) 0.068(4) 0.021(3) -0.005(2) -0.000(2)
 N(3) 0.045(5) 0.045(5) 0.035(6) 0.0000 0.0000 0.0000
 N(4) 0.042(5) 0.042(5) 0.034(5) 0.0000 0.0000 0.0000
 N(5) 0.034(5) 0.038(5) 0.050(5) 0.013(8) 0.0000 0.0000
 C(1) 0.053(7) 0.026(5) 0.074(6) -0.005(5) 0.004(4) -0.004(3)
 C(2) 0.045(11) 0.032(9) 0.052(13) 0.046(9) 0.011(10) 0.017(9)
 C(3) 0.025(9) 0.036(10) 0.066(15) 0.025(8) 0.009(10) 0.032(10)
 C(4) 0.016(4) 0.026(4) 0.096(7) -0.014(4) -0.002(3) -0.005(4)
 C(5) 0.031(9) 0.032(10) 0.064(12) 0.036(8) 0.019(8) 0.042(9)
 C(6) 0.021(8) 0.044(12) 0.064(12) 0.021(10) 0.004(7) -0.043(10)
 C(7) 0.013(9) 0.009(8) 0.105(15) -0.005(7) 0.016(8) -0.022(8)
 C(8) 0.10(2) 0.020(11) 0.097(16) -0.026(12) -0.044(14) 0.042(10)
 C(9) 0.030(12) 0.001(7) 0.092(16) 0.012(7) -0.054(12) -0.003(8)
 C(10) -0.010(6) 0.031(12) 0.103(16) 0.004(7) -0.013(9) 0.032(12)
 C(11) 0.060(17) 0.13(2) 0.025(6) -0.047(11) 0.015(9) -0.015(11)
 C(12) 0.070(19) 0.12(2) 0.043(8) -0.055(12) 0.008(11) -0.029(13)
 C(13) 0.049(6) 0.049(6) 0.036(7) 0.0000 0.0000 0.0000
 C(14) 0.049(6) 0.049(6) 0.048(8) 0.0000 0.0000 0.0000
 C(15) 0.050(12) 0.130(19) 0.044(8) 0.060(12) 0.008(8) -0.003(10)
 C(16) 0.14(2) 0.054(14) 0.070(12) 0.081(13) 0.016(13) 0.016(10)
 C(17) 0.045(5) 0.049(5) 0.048(4) -0.013(4) -0.001(3) 0.006(4)
 C(18) 0.061(6) 0.056(6) 0.051(5) -0.028(5) -0.006(4) 0.003(4)
 C(19) 0.065(8) 0.051(7) 0.052(6) -0.038(9) 0.0000 0.0000

#==============================================================================

_computing_data_collection            'CrystalClear'
_computing_cell_refinement            'CrystalClear'
_computing_data_reduction             'CrystalStructure'
_computing_structure_solution         'SIR2002'
_computing_structure_refinement       'CRYSTALS'
_computing_publication_material       'CrystalStructure 3.8'
_computing_molecular_graphics          ?

#==============================================================================

# MOLECULAR GEOMETRY

_geom_special_details
;
    ENTER SPECIAL DETAILS OF THE MOLECULAR GEOMETRY
;

loop_
_geom_bond_atom_site_label_1
_geom_bond_atom_site_label_2
_geom_bond_distance
_geom_bond_publ_flag
_geom_bond_site_symmetry_1
_geom_bond_site_symmetry_2
Fe(1) N(1) 2.134(6) yes . .
Fe(1) N(1) 2.134(6) yes . 2_655
Fe(1) N(1) 2.134(6) yes . 3_665
Fe(1) N(1) 2.134(6) yes . 4_565
Fe(1) N(3) 2.264(11) yes . .
Fe(1) N(4) 2.179(11) yes . .
Fe(2) N(2) 2.144(7) yes . .
Fe(2) N(2) 2.144(7) yes . 3_655
Fe(2) N(2) 2.144(8) yes . 10_566
Fe(2) N(2) 2.144(8) yes . 12_646
Fe(2) N(5) 2.232(8) yes . .
Fe(2) N(5) 2.232(8) yes . 10_566
N(1) C(1) 1.149(11) yes . .
N(2) C(4) 1.150(11) yes . .
N(3) C(11) 1.30(2) yes . .
N(3) C(11) 1.30(2) yes . 2_655
N(3) C(11) 1.30(2) yes . 3_665
N(3) C(11) 1.30(2) yes . 4_565
N(4) C(16) 1.27(2) yes . .
N(4) C(16) 1.27(2) yes . 2_655
N(4) C(16) 1.27(2) yes . 3_665
N(4) C(16) 1.27(2) yes . 4_565
N(5) C(17) 1.348(10) yes . .
N(5) C(17) 1.348(10) yes . 3_655
C(1) C(2) 1.406(18) yes . .
C(1) C(3) 1.45(2) yes . .
C(2) C(3) 0.63(2) yes . .
C(2) C(4) 1.408(18) yes . .
C(2) C(5) 1.55(2) yes . .
C(2) C(6) 1.64(2) yes . .
C(3) C(4) 1.40(2) yes . .
C(3) C(5) 1.71(2) yes . .
C(3) C(6) 1.44(2) yes . .
C(5) C(6) 0.92(2) yes . .
C(5) C(7) 1.45(2) yes . .
C(5) C(8) 1.73(2) yes . .
C(5) C(9) 1.43(2) yes . .
C(5) C(10) 1.61(2) yes . .
C(6) C(7) 1.76(2) yes . .
C(6) C(8) 1.41(2) yes . .
C(6) C(9) 1.63(2) yes . .
C(6) C(10) 1.39(2) yes . .
C(7) C(8) 1.09(3) yes . .
C(7) C(9) 1.47(3) yes . 9_666
C(7) C(10) 1.44(2) yes . 9_666
C(8) C(9) 1.26(3) yes . 9_666
C(8) C(10) 1.74(3) yes . 9_666
C(9) C(10) 0.73(3) yes . .
C(11) C(11) 1.55(3) yes . 2_655
C(11) C(11) 1.55(3) yes . 4_565
C(12) C(12) 1.59(3) yes . 2_655
C(12) C(12) 1.59(3) yes . 4_565
C(12) C(13) 1.34(2) yes . .
C(13) C(14) 1.47(2) yes . .
C(14) C(15) 1.39(2) yes . .
C(14) C(15) 1.39(2) yes . 2_655
C(14) C(15) 1.39(2) yes . 3_665
C(14) C(15) 1.39(2) yes . 4_565
C(15) C(15) 1.63(3) yes . 2_655
C(15) C(15) 1.63(2) yes . 4_565
C(16) C(16) 1.53(3) yes . 2_655
C(16) C(16) 1.53(4) yes . 4_565
C(17) C(18) 1.353(13) yes . .
C(18) C(19) 1.423(12) yes . .
C(19) C(19) 1.475(17) yes . 14_665
C(11) H(1) 0.950 no . .
C(12) H(3) 0.950 no . .
C(15) H(4) 0.950 no . .
C(16) H(5) 0.950 no . .
C(17) H(2) 0.950 no . .
C(18) H(6) 0.950 no . .

loop_
_geom_angle_atom_site_label_1
_geom_angle_atom_site_label_2
_geom_angle_atom_site_label_3
_geom_angle
_geom_angle_publ_flag
_geom_angle_site_symmetry_1
_geom_angle_site_symmetry_2
_geom_angle_site_symmetry_3
N(1) Fe(1) N(1) 90.0(2) yes . . 2_655
N(1) Fe(1) N(1) 179.4(2) yes . . 3_665
N(1) Fe(1) N(1) 90.0(2) yes . . 4_565
N(1) Fe(1) N(3) 89.68(19) yes . . .
N(1) Fe(1) N(4) 90.32(19) yes . . .
N(1) Fe(1) N(1) 90.0(2) yes 2_655 . 3_665
N(1) Fe(1) N(1) 179.4(2) yes 2_655 . 4_565
N(1) Fe(1) N(3) 89.68(19) yes 2_655 . .
N(1) Fe(1) N(4) 90.32(19) yes 2_655 . .
N(1) Fe(1) N(1) 90.0(2) yes 3_665 . 4_565
N(1) Fe(1) N(3) 89.68(19) yes 3_665 . .
N(1) Fe(1) N(4) 90.32(19) yes 3_665 . .
N(1) Fe(1) N(3) 89.68(19) yes 4_565 . .
N(1) Fe(1) N(4) 90.32(19) yes 4_565 . .
N(3) Fe(1) N(4) 180.0000 yes . . .
N(2) Fe(2) N(2) 179.2(2) yes . . 3_655
N(2) Fe(2) N(2) 90.0(2) yes . . 10_566
N(2) Fe(2) N(2) 90.0(2) yes . . 12_646
N(2) Fe(2) N(5) 90.41(19) yes . . .
N(2) Fe(2) N(5) 89.59(19) yes . . 10_566
N(2) Fe(2) N(2) 90.0(2) yes 3_655 . 10_566
N(2) Fe(2) N(2) 90.0(2) yes 3_655 . 12_646
N(2) Fe(2) N(5) 90.41(19) yes 3_655 . .
N(2) Fe(2) N(5) 89.59(19) yes 3_655 . 10_566
N(2) Fe(2) N(2) 179.2(2) yes 10_566 . 12_646
N(2) Fe(2) N(5) 89.59(19) yes 10_566 . .
N(2) Fe(2) N(5) 90.41(19) yes 10_566 . 10_566
N(2) Fe(2) N(5) 89.59(19) yes 12_646 . .
N(2) Fe(2) N(5) 90.41(19) yes 12_646 . 10_566
N(5) Fe(2) N(5) 180.0000 yes . . 10_566
Fe(1) N(1) C(1) 166.5(7) yes . . .
Fe(2) N(2) C(4) 163.7(7) yes . . .
Fe(1) N(3) C(11) 122.9(8) yes . . .
Fe(1) N(3) C(11) 122.9(8) yes . . 2_655
Fe(1) N(3) C(11) 122.9(8) yes . . 3_665
Fe(1) N(3) C(11) 122.9(8) yes . . 4_565
C(11) N(3) C(11) 72.8(14) yes . . 2_655
C(11) N(3) C(11) 114.2(13) yes . . 3_665
C(11) N(3) C(11) 72.8(14) yes . . 4_565
C(11) N(3) C(11) 72.8(14) yes 2_655 . 3_665
C(11) N(3) C(11) 114.2(13) yes 2_655 . 4_565
C(11) N(3) C(11) 72.8(14) yes 3_665 . 4_565
Fe(1) N(4) C(16) 121.8(10) yes . . .
Fe(1) N(4) C(16) 121.8(11) yes . . 2_655
Fe(1) N(4) C(16) 121.8(10) yes . . 3_665
Fe(1) N(4) C(16) 121.8(11) yes . . 4_565
C(16) N(4) C(16) 73.8(16) yes . . 2_655
C(16) N(4) C(16) 116.3(16) yes . . 3_665
C(16) N(4) C(16) 73.8(17) yes . . 4_565
C(16) N(4) C(16) 73.8(18) yes 2_655 . 3_665
C(16) N(4) C(16) 116.3(17) yes 2_655 . 4_565
C(16) N(4) C(16) 73.8(16) yes 3_665 . 4_565
Fe(2) N(5) C(17) 121.4(5) yes . . .
Fe(2) N(5) C(17) 121.4(5) yes . . 3_655
C(17) N(5) C(17) 117.2(8) yes . . 3_655
N(1) C(1) C(2) 166.9(12) yes . . .
N(1) C(1) C(3) 166.6(12) yes . . .
C(2) C(1) C(3) 25.5(11) yes . . .
C(1) C(2) C(3) 81(2) yes . . .
C(1) C(2) C(4) 118.5(14) yes . . .
C(1) C(2) C(5) 121.3(13) yes . . .
C(1) C(2) C(6) 107.6(13) yes . . .
C(3) C(2) C(4) 76(2) yes . . .
C(3) C(2) C(5) 94(2) yes . . .
C(3) C(2) C(6) 61(2) yes . . .
C(4) C(2) C(5) 116.5(12) yes . . .
C(4) C(2) C(6) 108.9(12) yes . . .
C(5) C(2) C(6) 33.4(11) yes . . .
C(1) C(3) C(2) 73(2) yes . . .
C(1) C(3) C(4) 116.4(15) yes . . .
C(1) C(3) C(5) 108.9(14) yes . . .
C(1) C(3) C(6) 116.7(16) yes . . .
C(2) C(3) C(4) 78(2) yes . . .
C(2) C(3) C(5) 65(2) yes . . .
C(2) C(3) C(6) 97(2) yes . . .
C(4) C(3) C(5) 107.7(14) yes . . .
C(4) C(3) C(6) 122.2(17) yes . . .
C(5) C(3) C(6) 32.6(11) yes . . .
N(2) C(4) C(2) 166.0(11) yes . . .
N(2) C(4) C(3) 165.6(12) yes . . .
C(2) C(4) C(3) 26.0(11) yes . . .
C(2) C(5) C(3) 21.7(10) yes . . .
C(2) C(5) C(6) 78.9(15) yes . . .
C(2) C(5) C(7) 120.3(14) yes . . .
C(2) C(5) C(8) 109.4(14) yes . . .
C(2) C(5) C(9) 123.4(15) yes . . .
C(2) C(5) C(10) 107.4(14) yes . . .
C(3) C(5) C(6) 57.5(14) yes . . .
C(3) C(5) C(7) 120.1(15) yes . . .
C(3) C(5) C(8) 96.1(14) yes . . .
C(3) C(5) C(9) 113.5(16) yes . . .
C(3) C(5) C(10) 91.5(13) yes . . .
C(6) C(5) C(7) 93.6(19) yes . . .
C(6) C(5) C(8) 54.8(16) yes . . .
C(6) C(5) C(9) 85.4(19) yes . . .
C(6) C(5) C(10) 59.4(16) yes . . .
C(7) C(5) C(8) 39.0(13) yes . . .
C(7) C(5) C(9) 114.6(14) yes . . .
C(7) C(5) C(10) 119.0(14) yes . . .
C(8) C(5) C(9) 104.2(14) yes . . .
C(8) C(5) C(10) 92.4(13) yes . . .
C(9) C(5) C(10) 26.8(12) yes . . .
C(2) C(6) C(3) 22.5(11) yes . . .
C(2) C(6) C(5) 67.7(15) yes . . .
C(2) C(6) C(7) 99.4(13) yes . . .
C(2) C(6) C(8) 122.1(16) yes . . .
C(2) C(6) C(9) 106.2(14) yes . . .
C(2) C(6) C(10) 114.0(15) yes . . .
C(3) C(6) C(5) 89.9(17) yes . . .
C(3) C(6) C(7) 117.1(15) yes . . .
C(3) C(6) C(8) 127.1(17) yes . . .
C(3) C(6) C(9) 117.2(16) yes . . .
C(3) C(6) C(10) 114.3(16) yes . . .
C(5) C(6) C(7) 55.0(15) yes . . .
C(5) C(6) C(8) 93(2) yes . . .
C(5) C(6) C(9) 60.5(16) yes . . .
C(5) C(6) C(10) 86.0(19) yes . . .
C(7) C(6) C(8) 38.3(13) yes . . .
C(7) C(6) C(9) 90.7(12) yes . . .
C(7) C(6) C(10) 113.0(14) yes . . .
C(8) C(6) C(9) 109.8(15) yes . . .
C(8) C(6) C(10) 118.6(15) yes . . .
C(9) C(6) C(10) 26.4(12) yes . . .
C(5) C(7) C(6) 31.4(11) yes . . .
C(5) C(7) C(8) 84.6(17) yes . . .
C(5) C(7) C(9) 119.2(16) yes . . 9_666
C(5) C(7) C(10) 129.1(15) yes . . 9_666
C(6) C(7) C(8) 53.3(14) yes . . .
C(6) C(7) C(9) 97.5(15) yes . . 9_666
C(6) C(7) C(10) 119.8(16) yes . . 9_666
C(8) C(7) C(9) 56.5(17) yes . . 9_666
C(8) C(7) C(10) 86(2) yes . . 9_666
C(9) C(7) C(10) 29.0(13) yes 9_666 . 9_666
C(5) C(8) C(6) 32.1(11) yes . . .
C(5) C(8) C(7) 56.4(14) yes . . .
C(5) C(8) C(9) 113.9(18) yes . . 9_666
C(5) C(8) C(10) 97.4(15) yes . . 9_666
C(6) C(8) C(7) 88.4(18) yes . . .
C(6) C(8) C(9) 131.5(18) yes . . 9_666
C(6) C(8) C(10) 123.0(17) yes . . 9_666
C(7) C(8) C(9) 77(2) yes . . 9_666
C(7) C(8) C(10) 55.6(15) yes . . 9_666
C(9) C(8) C(10) 21.5(13) yes 9_666 . 9_666
C(5) C(9) C(6) 34.1(11) yes . . .
C(5) C(9) C(7) 116.2(15) yes . . 9_666
C(5) C(9) C(8) 112.0(16) yes . . 9_666
C(5) C(9) C(10) 91(2) yes . . .
C(6) C(9) C(7) 95.4(14) yes . . 9_666
C(6) C(9) C(8) 118.3(16) yes . . 9_666
C(6) C(9) C(10) 58(2) yes . . .
C(7) C(9) C(8) 46.4(16) yes 9_666 . 9_666
C(7) C(9) C(10) 73(2) yes 9_666 . .
C(8) C(9) C(10) 119(3) yes 9_666 . .
C(5) C(10) C(6) 34.6(12) yes . . .
C(5) C(10) C(7) 107.3(15) yes . . 9_666
C(5) C(10) C(8) 83.3(13) yes . . 9_666
C(5) C(10) C(9) 62(2) yes . . .
C(6) C(10) C(7) 108.6(15) yes . . 9_666
C(6) C(10) C(8) 104.9(15) yes . . 9_666
C(6) C(10) C(9) 95(2) yes . . .
C(7) C(10) C(8) 38.8(13) yes 9_666 . 9_666
C(7) C(10) C(9) 78(2) yes 9_666 . .
C(8) C(10) C(9) 39(2) yes 9_666 . .
N(3) C(11) C(11) 53.6(11) yes . . 2_655
N(3) C(11) C(11) 53.6(11) yes . . 4_565
N(3) C(11) C(12) 124.2(19) yes . . 3_665
C(11) C(11) C(11) 90.0(17) yes 2_655 . 4_565
C(11) C(11) C(12) 91.8(15) yes 2_655 . 3_665
C(11) C(11) C(12) 90.0(16) yes 4_565 . 3_665
C(11) C(12) C(12) 88.2(15) yes 3_665 . 2_655
C(11) C(12) C(12) 89.9(17) yes 3_665 . 4_565
C(11) C(12) C(13) 121(2) yes 3_665 . .
C(12) C(12) C(12) 90.0(17) yes 2_655 . 4_565
C(12) C(12) C(13) 53.4(11) yes 2_655 . .
C(12) C(12) C(13) 53.4(12) yes 4_565 . .
C(12) C(13) C(12) 73.1(14) yes . . 2_655
C(12) C(13) C(12) 114.8(15) yes . . 3_665
C(12) C(13) C(12) 73.1(15) yes . . 4_565
C(12) C(13) C(14) 122.6(9) yes . . .
C(12) C(13) C(12) 73.1(15) yes 2_655 . 3_665
C(12) C(13) C(12) 114.8(15) yes 2_655 . 4_565
C(12) C(13) C(14) 122.6(9) yes 2_655 . .
C(12) C(13) C(12) 73.1(14) yes 3_665 . 4_565
C(12) C(13) C(14) 122.6(9) yes 3_665 . .
C(12) C(13) C(14) 122.6(9) yes 4_565 . .
C(13) C(14) C(15) 123.9(9) yes . . .
C(13) C(14) C(15) 123.9(9) yes . . 2_655
C(13) C(14) C(15) 123.9(9) yes . . 3_665
C(13) C(14) C(15) 123.9(9) yes . . 4_565
C(15) C(14) C(15) 71.8(14) yes . . 2_655
C(15) C(14) C(15) 112.1(14) yes . . 3_665
C(15) C(14) C(15) 71.8(12) yes . . 4_565
C(15) C(14) C(15) 71.8(12) yes 2_655 . 3_665
C(15) C(14) C(15) 112.1(15) yes 2_655 . 4_565
C(15) C(14) C(15) 71.8(14) yes 3_665 . 4_565
C(14) C(15) C(15) 54.1(10) yes . . 2_655
C(14) C(15) C(15) 54.1(10) yes . . 4_565
C(14) C(15) C(16) 120.8(19) yes . . 8_664
C(15) C(15) C(15) 90.0(14) yes 2_655 . 4_565
C(15) C(15) C(16) 89.4(16) yes 2_655 . 8_664
C(15) C(15) C(16) 86.2(16) yes 4_565 . 8_664
N(4) C(16) C(15) 125(2) yes . . 8_665
N(4) C(16) C(16) 53.1(13) yes . . 2_655
N(4) C(16) C(16) 53.1(13) yes . . 4_565
C(15) C(16) C(16) 93.8(18) yes 8_665 . 2_655
C(15) C(16) C(16) 90.4(18) yes 8_665 . 4_565
C(16) C(16) C(16) 90.0(19) yes 2_655 . 4_565
N(5) C(17) C(18) 123.9(9) yes . . .
C(17) C(18) C(19) 119.0(9) yes . . .
C(18) C(19) C(18) 116.8(10) yes . . 3_655
C(18) C(19) C(19) 121.6(5) yes . . 14_665
C(18) C(19) C(19) 121.6(5) yes 3_655 . 14_665
N(3) C(11) H(1) 117.5 no . . .
C(11) C(11) H(1) 131.1 no 2_655 . .
C(11) C(11) H(1) 124.8 no 4_565 . .
C(12) C(11) H(1) 118.1 no 3_665 . .
C(11) C(12) H(3) 119.7 no 3_665 . .
C(12) C(12) H(3) 130.0 no 2_655 . .
C(12) C(12) H(3) 127.0 no 4_565 . .
C(13) C(12) H(3) 119.1 no . . .
C(14) C(15) H(4) 118.4 no . . .
C(15) C(15) H(4) 129.2 no 2_655 . .
C(15) C(15) H(4) 128.3 no 4_565 . .
C(16) C(15) H(4) 120.7 no 8_664 . .
N(4) C(16) H(5) 117.5 no . . .
C(15) C(16) H(5) 117.4 no 8_665 . .
C(16) C(16) H(5) 130.9 no 2_655 . .
C(16) C(16) H(5) 124.0 no 4_565 . .
N(5) C(17) H(2) 118.4 no . . .
C(18) C(17) H(2) 117.7 no . . .
C(17) C(18) H(6) 121.1 no . . .
C(19) C(18) H(6) 119.8 no . . .

loop_
_geom_torsion_atom_site_label_1
_geom_torsion_atom_site_label_2
_geom_torsion_atom_site_label_3
_geom_torsion_atom_site_label_4
_geom_torsion
_geom_torsion_publ_flag
_geom_torsion_site_symmetry_1
_geom_torsion_site_symmetry_2
_geom_torsion_site_symmetry_3
_geom_torsion_site_symmetry_4
N(1) Fe(1) N(1) C(1) 12(3) ? . . 2_655 2_655
N(1) Fe(1) N(1) C(1) -168(3) ? 2_655 . . .
N(1) Fe(1) N(1) C(1) -78(21) ? . . 3_665 3_665
N(1) Fe(1) N(1) C(1) -78(21) ? 3_665 . . .
N(1) Fe(1) N(1) C(1) -168(3) ? . . 4_565 4_565
N(1) Fe(1) N(1) C(1) 12(3) ? 4_565 . . .
N(1) Fe(1) N(3) C(11) -146.3(12) ? . . . .
N(1) Fe(1) N(3) C(11) 123.7(12) ? . . . 2_655
N(1) Fe(1) N(3) C(11) 33.7(12) ? . . . 3_665
N(1) Fe(1) N(3) C(11) -56.3(12) ? . . . 4_565
N(3) Fe(1) N(1) C(1) -78(3) ? . . . .
N(1) Fe(1) N(4) C(16) -138.4(15) ? . . . .
N(1) Fe(1) N(4) C(16) -48.4(13) ? . . . 2_655
N(1) Fe(1) N(4) C(16) 41.6(15) ? . . . 3_665
N(1) Fe(1) N(4) C(16) 131.6(13) ? . . . 4_565
N(4) Fe(1) N(1) C(1) 102(3) ? . . . .
N(1) Fe(1) N(1) C(1) 12(3) ? 2_655 . 3_665 3_665
N(1) Fe(1) N(1) C(1) -168(3) ? 3_665 . 2_655 2_655
N(1) Fe(1) N(1) C(1) -78(22) ? 2_655 . 4_565 4_565
N(1) Fe(1) N(1) C(1) -78(22) ? 4_565 . 2_655 2_655
N(1) Fe(1) N(3) C(11) -56.3(12) ? 2_655 . . .
N(1) Fe(1) N(3) C(11) -146.3(12) ? 2_655 . . 2_655
N(1) Fe(1) N(3) C(11) 123.7(12) ? 2_655 . . 3_665
N(1) Fe(1) N(3) C(11) 33.7(12) ? 2_655 . . 4_565
N(3) Fe(1) N(1) C(1) -78(3) ? . . 2_655 2_655
N(1) Fe(1) N(4) C(16) 131.6(15) ? 2_655 . . .
N(1) Fe(1) N(4) C(16) -138.4(13) ? 2_655 . . 2_655
N(1) Fe(1) N(4) C(16) -48.4(15) ? 2_655 . . 3_665
N(1) Fe(1) N(4) C(16) 41.6(13) ? 2_655 . . 4_565
N(4) Fe(1) N(1) C(1) 102(3) ? . . 2_655 2_655
N(1) Fe(1) N(1) C(1) 12(3) ? 3_665 . 4_565 4_565
N(1) Fe(1) N(1) C(1) -168(3) ? 4_565 . 3_665 3_665
N(1) Fe(1) N(3) C(11) 33.7(12) ? 3_665 . . .
N(1) Fe(1) N(3) C(11) -56.3(12) ? 3_665 . . 2_655
N(1) Fe(1) N(3) C(11) -146.3(12) ? 3_665 . . 3_665
N(1) Fe(1) N(3) C(11) 123.7(12) ? 3_665 . . 4_565
N(3) Fe(1) N(1) C(1) -78(3) ? . . 3_665 3_665
N(1) Fe(1) N(4) C(16) 41.6(15) ? 3_665 . . .
N(1) Fe(1) N(4) C(16) 131.6(13) ? 3_665 . . 2_655
N(1) Fe(1) N(4) C(16) -138.4(15) ? 3_665 . . 3_665
N(1) Fe(1) N(4) C(16) -48.4(13) ? 3_665 . . 4_565
N(4) Fe(1) N(1) C(1) 102(3) ? . . 3_665 3_665
N(1) Fe(1) N(3) C(11) 123.7(12) ? 4_565 . . .
N(1) Fe(1) N(3) C(11) 33.7(12) ? 4_565 . . 2_655
N(1) Fe(1) N(3) C(11) -56.3(12) ? 4_565 . . 3_665
N(1) Fe(1) N(3) C(11) -146.3(12) ? 4_565 . . 4_565
N(3) Fe(1) N(1) C(1) -78(3) ? . . 4_565 4_565
N(1) Fe(1) N(4) C(16) -48.4(15) ? 4_565 . . .
N(1) Fe(1) N(4) C(16) 41.6(13) ? 4_565 . . 2_655
N(1) Fe(1) N(4) C(16) 131.6(15) ? 4_565 . . 3_665
N(1) Fe(1) N(4) C(16) -138.4(13) ? 4_565 . . 4_565
N(4) Fe(1) N(1) C(1) 102(3) ? . . 4_565 4_565
N(2) Fe(2) N(2) C(4) -84(21) ? . . 3_655 3_655
N(2) Fe(2) N(2) C(4) -84(21) ? 3_655 . . .
N(2) Fe(2) N(2) C(4) -6(2) ? . . 10_566 10_566
N(2) Fe(2) N(2) C(4) -175(2) ? 10_566 . . .
N(2) Fe(2) N(2) C(4) 175(2) ? . . 12_646 12_646
N(2) Fe(2) N(2) C(4) 6(2) ? 12_646 . . .
N(2) Fe(2) N(5) C(17) -140.2(5) ? . . . .
N(2) Fe(2) N(5) C(17) 39.8(5) ? . . . 3_655
N(5) Fe(2) N(2) C(4) 96(2) ? . . . .
N(2) Fe(2) N(5) C(17) 50.2(5) ? . . 10_566 10_566
N(5) Fe(2) N(2) C(4) -84(2) ? 10_566 . . .
N(2) Fe(2) N(2) C(4) 175(2) ? 3_655 . 10_566 10_566
N(2) Fe(2) N(2) C(4) 6(2) ? 10_566 . 3_655 3_655
N(2) Fe(2) N(2) C(4) -6(2) ? 3_655 . 12_646 12_646
N(2) Fe(2) N(2) C(4) -175(2) ? 12_646 . 3_655 3_655
N(2) Fe(2) N(5) C(17) 39.8(5) ? 3_655 . . .
N(2) Fe(2) N(5) C(17) -140.2(5) ? 3_655 . . 3_655
N(5) Fe(2) N(2) C(4) 96(2) ? . . 3_655 3_655
N(2) Fe(2) N(5) C(17) -129.8(5) ? 3_655 . 10_566 10_566
N(5) Fe(2) N(2) C(4) -84(2) ? 10_566 . 3_655 3_655
N(2) Fe(2) N(2) C(4) 84(18) ? 10_566 . 12_646 12_646
N(2) Fe(2) N(2) C(4) 84(18) ? 12_646 . 10_566 10_566
N(2) Fe(2) N(5) C(17) 129.8(5) ? 10_566 . . .
N(2) Fe(2) N(5) C(17) -50.2(5) ? 10_566 . . 3_655
N(5) Fe(2) N(2) C(4) 84(2) ? . . 10_566 10_566
N(2) Fe(2) N(5) C(17) 140.2(5) ? 10_566 . 10_566 10_566
N(5) Fe(2) N(2) C(4) -96(2) ? 10_566 . 10_566 10_566
N(2) Fe(2) N(5) C(17) -50.2(5) ? 12_646 . . .
N(2) Fe(2) N(5) C(17) 129.8(5) ? 12_646 . . 3_655
N(5) Fe(2) N(2) C(4) 84(2) ? . . 12_646 12_646
N(2) Fe(2) N(5) C(17) -39.8(5) ? 12_646 . 10_566 10_566
N(5) Fe(2) N(2) C(4) -96(2) ? 10_566 . 12_646 12_646
Fe(1) N(1) C(1) C(2) 64(7) ? . . . .
Fe(1) N(1) C(1) C(3) -85(6) ? . . . .
Fe(2) N(2) C(4) C(2) -78(5) ? . . . .
Fe(2) N(2) C(4) C(3) 55(6) ? . . . .
Fe(1) N(3) C(11) C(11) -118.5(10) ? . . . 2_655
Fe(1) N(3) C(11) C(11) 118.5(10) ? . . . 4_565
Fe(1) N(3) C(11) C(12) 178.5(17) ? . . . 3_665
Fe(1) N(3) C(11) C(11) 118.5(10) ? . . 2_655 .
Fe(1) N(3) C(11) C(11) -118.5(10) ? . . 2_655 3_665
Fe(1) N(3) C(11) C(12) 178.5(17) ? . . 2_655 4_565
Fe(1) N(3) C(11) C(11) 118.5(10) ? . . 3_665 2_655
Fe(1) N(3) C(11) C(11) -118.5(11) ? . . 3_665 4_565
Fe(1) N(3) C(11) C(12) 178.5(17) ? . . 3_665 .
Fe(1) N(3) C(11) C(11) -118.5(10) ? . . 4_565 .
Fe(1) N(3) C(11) C(11) 118.5(11) ? . . 4_565 3_665
Fe(1) N(3) C(11) C(12) 178.5(17) ? . . 4_565 2_655
C(11) N(3) C(11) C(11) 123.0(14) ? . . 2_655 3_665
C(11) N(3) C(11) C(12) 60(2) ? . . 2_655 4_565
C(11) N(3) C(11) C(11) -123.0(14) ? 2_655 . . 4_565
C(11) N(3) C(11) C(12) -63(2) ? 2_655 . . 3_665
C(11) N(3) C(11) C(11) -61.5(15) ? . . 3_665 2_655
C(11) N(3) C(11) C(11) 61.5(16) ? . . 3_665 4_565
C(11) N(3) C(11) C(12) -2(2) ? . . 3_665 .
C(11) N(3) C(11) C(11) 61.5(16) ? 3_665 . . 2_655
C(11) N(3) C(11) C(11) -61.5(15) ? 3_665 . . 4_565
C(11) N(3) C(11) C(12) -2(2) ? 3_665 . . 3_665
C(11) N(3) C(11) C(11) -123.0(14) ? . . 4_565 3_665
C(11) N(3) C(11) C(12) -63(2) ? . . 4_565 2_655
C(11) N(3) C(11) C(11) 123.0(14) ? 4_565 . . 2_655
C(11) N(3) C(11) C(12) 60(2) ? 4_565 . . 3_665
C(11) N(3) C(11) C(11) 123.0(14) ? 2_655 . 3_665 4_565
C(11) N(3) C(11) C(12) 60(2) ? 2_655 . 3_665 .
C(11) N(3) C(11) C(11) -123.0(14) ? 3_665 . 2_655 .
C(11) N(3) C(11) C(12) -63(2) ? 3_665 . 2_655 4_565
C(11) N(3) C(11) C(11) 61.5(15) ? 2_655 . 4_565 .
C(11) N(3) C(11) C(11) -61.5(16) ? 2_655 . 4_565 3_665
C(11) N(3) C(11) C(12) -2(2) ? 2_655 . 4_565 2_655
C(11) N(3) C(11) C(11) -61.5(16) ? 4_565 . 2_655 .
C(11) N(3) C(11) C(11) 61.5(15) ? 4_565 . 2_655 3_665
C(11) N(3) C(11) C(12) -2(2) ? 4_565 . 2_655 4_565
C(11) N(3) C(11) C(11) 123.0(14) ? 3_665 . 4_565 .
C(11) N(3) C(11) C(12) 60(2) ? 3_665 . 4_565 2_655
C(11) N(3) C(11) C(11) -123.0(14) ? 4_565 . 3_665 2_655
C(11) N(3) C(11) C(12) -63(2) ? 4_565 . 3_665 .
Fe(1) N(4) C(16) C(15) -177.1(19) ? . . . 8_665
Fe(1) N(4) C(16) C(16) 117.8(13) ? . . . 2_655
Fe(1) N(4) C(16) C(16) -117.8(12) ? . . . 4_565
Fe(1) N(4) C(16) C(16) -117.8(13) ? . . 2_655 .
Fe(1) N(4) C(16) C(16) -117.8(12) ? . . 3_665 2_655
Fe(1) N(4) C(16) C(16) 117.8(13) ? . . 3_665 4_565
Fe(1) N(4) C(16) C(16) 117.8(12) ? . . 4_565 .
C(16) N(4) C(16) C(15) 65(2) ? 2_655 . . 8_665
C(16) N(4) C(16) C(16) 124.4(17) ? 2_655 . . 4_565
C(16) N(4) C(16) C(16) 62.2(19) ? . . 3_665 2_655
C(16) N(4) C(16) C(16) -62(2) ? . . 3_665 4_565
C(16) N(4) C(16) C(15) 3(3) ? 3_665 . . 8_665
C(16) N(4) C(16) C(16) -62(2) ? 3_665 . . 2_655
C(16) N(4) C(16) C(16) 62.2(19) ? 3_665 . . 4_565
C(16) N(4) C(16) C(15) -59(2) ? 4_565 . . 8_665
C(16) N(4) C(16) C(16) -124.4(17) ? 4_565 . . 2_655
C(16) N(4) C(16) C(16) -124.4(17) ? 2_655 . 3_665 4_565
C(16) N(4) C(16) C(16) 124.4(17) ? 3_665 . 2_655 .
C(16) N(4) C(16) C(16) -62.2(18) ? 2_655 . 4_565 .
C(16) N(4) C(16) C(16) 62.2(19) ? 4_565 . 2_655 .
C(16) N(4) C(16) C(16) -124.4(17) ? 3_665 . 4_565 .
C(16) N(4) C(16) C(16) 124.4(17) ? 4_565 . 3_665 2_655
Fe(2) N(5) C(17) C(18) 179.3(7) ? . . . .
Fe(2) N(5) C(17) C(18) 179.3(7) ? . . 3_655 3_655
C(17) N(5) C(17) C(18) -0.7(10) ? . . 3_655 3_655
C(17) N(5) C(17) C(18) -0.7(12) ? 3_655 . . .
N(1) C(1) C(2) C(3) -164(5) ? . . . .
N(1) C(1) C(2) C(4) 128(4) ? . . . .
N(1) C(1) C(2) C(5) -75(5) ? . . . .
N(1) C(1) C(2) C(6) -108(5) ? . . . .
N(1) C(1) C(3) C(2) 164(4) ? . . . .
N(1) C(1) C(3) C(4) -129(4) ? . . . .
N(1) C(1) C(3) C(5) 109(5) ? . . . .
N(1) C(1) C(3) C(6) 75(5) ? . . . .
C(2) C(1) C(3) C(4) 67(2) ? . . . .
C(2) C(1) C(3) C(5) -55(2) ? . . . .
C(2) C(1) C(3) C(6) -89(3) ? . . . .
C(3) C(1) C(2) C(4) -69(2) ? . . . .
C(3) C(1) C(2) C(5) 89(3) ? . . . .
C(3) C(1) C(2) C(6) 55(2) ? . . . .
C(1) C(2) C(3) C(4) -122.5(12) ? . . . .
C(1) C(2) C(3) C(5) 121.1(12) ? . . . .
C(1) C(2) C(3) C(6) 115.9(16) ? . . . .
C(1) C(2) C(4) N(2) -133(4) ? . . . .
C(1) C(2) C(4) C(3) 72(2) ? . . . .
C(1) C(2) C(5) C(3) -82(2) ? . . . .
C(1) C(2) C(5) C(6) -74(2) ? . . . .
C(1) C(2) C(5) C(7) 14(2) ? . . . .
C(1) C(2) C(5) C(8) -28(2) ? . . . .
C(1) C(2) C(5) C(9) -150.6(18) ? . . . .
C(1) C(2) C(5) C(10) -126.6(16) ? . . . .
C(1) C(2) C(6) C(3) -69(2) ? . . . .
C(1) C(2) C(6) C(5) 120.6(18) ? . . . .
C(1) C(2) C(6) C(7) 74.7(15) ? . . . .
C(1) C(2) C(6) C(8) 41(2) ? . . . .
C(1) C(2) C(6) C(9) 168.3(13) ? . . . .
C(1) C(2) C(6) C(10) -164.8(16) ? . . . .
C(3) C(2) C(4) N(2) 156(4) ? . . . .
C(4) C(2) C(3) C(1) 122.5(12) ? . . . .
C(4) C(2) C(3) C(5) -116.4(11) ? . . . .
C(4) C(2) C(3) C(6) -121.6(16) ? . . . .
C(3) C(2) C(5) C(6) 8(2) ? . . . .
C(3) C(2) C(5) C(7) 96(2) ? . . . .
C(3) C(2) C(5) C(8) 54(2) ? . . . .
C(3) C(2) C(5) C(9) -69(3) ? . . . .
C(3) C(2) C(5) C(10) -45(2) ? . . . .
C(5) C(2) C(3) C(1) -121.1(12) ? . . . .
C(5) C(2) C(3) C(4) 116.4(11) ? . . . .
C(5) C(2) C(3) C(6) -5.2(17) ? . . . .
C(3) C(2) C(6) C(5) -171(3) ? . . . .
C(3) C(2) C(6) C(7) 143(2) ? . . . .
C(3) C(2) C(6) C(8) 110(3) ? . . . .
C(3) C(2) C(6) C(9) -123(2) ? . . . .
C(3) C(2) C(6) C(10) -96(3) ? . . . .
C(6) C(2) C(3) C(1) -115.9(16) ? . . . .
C(6) C(2) C(3) C(4) 121.6(16) ? . . . .
C(6) C(2) C(3) C(5) 5.2(17) ? . . . .
C(4) C(2) C(5) C(3) 76(2) ? . . . .
C(4) C(2) C(5) C(6) 84(2) ? . . . .
C(4) C(2) C(5) C(7) 171.9(17) ? . . . .
C(4) C(2) C(5) C(8) 130.4(15) ? . . . .
C(4) C(2) C(5) C(9) 7(2) ? . . . .
C(4) C(2) C(5) C(10) 31(2) ? . . . .
C(5) C(2) C(4) N(2) 69(5) ? . . . .
C(5) C(2) C(4) C(3) -87(2) ? . . . .
C(4) C(2) C(6) C(3) 61(2) ? . . . .
C(4) C(2) C(6) C(5) -109.8(18) ? . . . .
C(4) C(2) C(6) C(7) -155.7(12) ? . . . .
C(4) C(2) C(6) C(8) 171.0(18) ? . . . .
C(4) C(2) C(6) C(9) -62.1(17) ? . . . .
C(4) C(2) C(6) C(10) -35(2) ? . . . .
C(6) C(2) C(4) N(2) 104(4) ? . . . .
C(6) C(2) C(4) C(3) -52(2) ? . . . .
C(5) C(2) C(6) C(3) 171(3) ? . . . .
C(5) C(2) C(6) C(7) -45.9(15) ? . . . .
C(5) C(2) C(6) C(8) -79(2) ? . . . .
C(5) C(2) C(6) C(9) 47.7(16) ? . . . .
C(5) C(2) C(6) C(10) 75(2) ? . . . .
C(6) C(2) C(5) C(3) -8(2) ? . . . .
C(6) C(2) C(5) C(7) 88(2) ? . . . .
C(6) C(2) C(5) C(8) 46.2(16) ? . . . .
C(6) C(2) C(5) C(9) -77(2) ? . . . .
C(6) C(2) C(5) C(10) -52.8(17) ? . . . .
C(1) C(3) C(4) N(2) 139(4) ? . . . .
C(1) C(3) C(4) C(2) -64(2) ? . . . .
C(1) C(3) C(5) C(2) 60(2) ? . . . .
C(1) C(3) C(5) C(6) -110(2) ? . . . .
C(1) C(3) C(5) C(7) -37(2) ? . . . .
C(1) C(3) C(5) C(8) -69.5(16) ? . . . .
C(1) C(3) C(5) C(9) -177.9(15) ? . . . .
C(1) C(3) C(5) C(10) -162.0(14) ? . . . .
C(1) C(3) C(6) C(2) 75(2) ? . . . .
C(1) C(3) C(6) C(5) 83(2) ? . . . .
C(1) C(3) C(6) C(7) 33(2) ? . . . .
C(1) C(3) C(6) C(8) -11(3) ? . . . .
C(1) C(3) C(6) C(9) 139.7(16) ? . . . .
C(1) C(3) C(6) C(10) 168.9(18) ? . . . .
C(2) C(3) C(4) N(2) -156(4) ? . . . .
C(2) C(3) C(5) C(6) -170(3) ? . . . .
C(2) C(3) C(5) C(7) -97(2) ? . . . .
C(2) C(3) C(5) C(8) -130(2) ? . . . .
C(2) C(3) C(5) C(9) 122(2) ? . . . .
C(2) C(3) C(5) C(10) 138(2) ? . . . .
C(2) C(3) C(6) C(5) 9(2) ? . . . .
C(2) C(3) C(6) C(7) -41(3) ? . . . .
C(2) C(3) C(6) C(8) -85(3) ? . . . .
C(2) C(3) C(6) C(9) 65(3) ? . . . .
C(2) C(3) C(6) C(10) 94(3) ? . . . .
C(4) C(3) C(5) C(2) -67(2) ? . . . .
C(4) C(3) C(5) C(6) 123(2) ? . . . .
C(4) C(3) C(5) C(7) -163.9(16) ? . . . .
C(4) C(3) C(5) C(8) 163.5(14) ? . . . .
C(4) C(3) C(5) C(9) 55(2) ? . . . .
C(4) C(3) C(5) C(10) 71.0(16) ? . . . .
C(5) C(3) C(4) N(2) -98(4) ? . . . .
C(5) C(3) C(4) C(2) 58(2) ? . . . .
C(4) C(3) C(6) C(2) -80(2) ? . . . .
C(4) C(3) C(6) C(5) -72(2) ? . . . .
C(4) C(3) C(6) C(7) -121.4(18) ? . . . .
C(4) C(3) C(6) C(8) -165(2) ? . . . .
C(4) C(3) C(6) C(9) -15(2) ? . . . .
C(4) C(3) C(6) C(10) 14(2) ? . . . .
C(6) C(3) C(4) N(2) -66(5) ? . . . .
C(6) C(3) C(4) C(2) 91(3) ? . . . .
C(5) C(3) C(6) C(2) -9(2) ? . . . .
C(5) C(3) C(6) C(7) -49.9(17) ? . . . .
C(5) C(3) C(6) C(8) -94(2) ? . . . .
C(5) C(3) C(6) C(9) 56.3(18) ? . . . .
C(5) C(3) C(6) C(10) 86(2) ? . . . .
C(6) C(3) C(5) C(2) 170(3) ? . . . .
C(6) C(3) C(5) C(7) 74(2) ? . . . .
C(6) C(3) C(5) C(8) 40.9(17) ? . . . .
C(6) C(3) C(5) C(9) -68(2) ? . . . .
C(6) C(3) C(5) C(10) -51.6(18) ? . . . .
C(2) C(5) C(6) C(3) -3.6(12) ? . . . .
C(2) C(5) C(6) C(7) 120.2(13) ? . . . .
C(2) C(5) C(6) C(8) 123.6(14) ? . . . .
C(2) C(5) C(6) C(9) -125.3(13) ? . . . .
C(2) C(5) C(6) C(10) -118.0(12) ? . . . .
C(2) C(5) C(7) C(6) -79(2) ? . . . .
C(2) C(5) C(7) C(8) -84(2) ? . . . .
C(2) C(5) C(7) C(9) -130.2(19) ? . . . 9_666
C(2) C(5) C(7) C(10) -163(2) ? . . . 9_666
C(2) C(5) C(8) C(6) -60.1(17) ? . . . .
C(2) C(5) C(8) C(7) 114.6(19) ? . . . .
C(2) C(5) C(8) C(9) 168.7(17) ? . . . 9_666
C(2) C(5) C(8) C(10) 154.2(14) ? . . . 9_666
C(2) C(5) C(9) C(6) 73(2) ? . . . .
C(2) C(5) C(9) C(10) 59(3) ? . . . .
C(2) C(5) C(9) C(7) 131(2) ? . . . 9_666
C(2) C(5) C(9) C(8) -178(2) ? . . . 9_666
C(2) C(5) C(10) C(6) 65.2(17) ? . . . .
C(2) C(5) C(10) C(9) -131(2) ? . . . .
C(2) C(5) C(10) C(7) 163.1(16) ? . . . 9_666
C(2) C(5) C(10) C(8) -166.0(14) ? . . . 9_666
C(3) C(5) C(6) C(2) 3.6(12) ? . . . .
C(3) C(5) C(6) C(7) 123.8(14) ? . . . .
C(3) C(5) C(6) C(8) 127.2(18) ? . . . .
C(3) C(5) C(6) C(9) -121.8(15) ? . . . .
C(3) C(5) C(6) C(10) -114.4(16) ? . . . .
C(3) C(5) C(7) C(6) -54.1(17) ? . . . .
C(3) C(5) C(7) C(8) -58(2) ? . . . .
C(3) C(5) C(7) C(9) -105(2) ? . . . 9_666
C(3) C(5) C(7) C(10) -138(2) ? . . . 9_666
C(3) C(5) C(8) C(6) -42.5(16) ? . . . .
C(3) C(5) C(8) C(7) 132.1(18) ? . . . .
C(3) C(5) C(8) C(9) -173.8(18) ? . . . 9_666
C(3) C(5) C(8) C(10) 171.7(13) ? . . . 9_666
C(3) C(5) C(9) C(6) 51.4(16) ? . . . .
C(3) C(5) C(9) C(10) 37(2) ? . . . .
C(3) C(5) C(9) C(7) 109(2) ? . . . 9_666
C(3) C(5) C(9) C(8) 159.7(19) ? . . . 9_666
C(3) C(5) C(10) C(6) 50.2(15) ? . . . .
C(3) C(5) C(10) C(9) -146(2) ? . . . .
C(3) C(5) C(10) C(7) 148.0(17) ? . . . 9_666
C(3) C(5) C(10) C(8) 178.9(13) ? . . . 9_666
C(6) C(5) C(7) C(8) -4.4(19) ? . . . .
C(6) C(5) C(7) C(9) -51(2) ? . . . 9_666
C(6) C(5) C(7) C(10) -84(2) ? . . . 9_666
C(7) C(5) C(6) C(2) -120.2(13) ? . . . .
C(7) C(5) C(6) C(3) -123.8(14) ? . . . .
C(7) C(5) C(6) C(8) 3.4(15) ? . . . .
C(7) C(5) C(6) C(9) 114.5(14) ? . . . .
C(7) C(5) C(6) C(10) 121.8(13) ? . . . .
C(6) C(5) C(8) C(7) 175(2) ? . . . .
C(6) C(5) C(8) C(9) -131(2) ? . . . 9_666
C(6) C(5) C(8) C(10) -146(2) ? . . . 9_666
C(8) C(5) C(6) C(2) -123.6(14) ? . . . .
C(8) C(5) C(6) C(3) -127.2(18) ? . . . .
C(8) C(5) C(6) C(7) -3.4(15) ? . . . .
C(8) C(5) C(6) C(9) 111.1(15) ? . . . .
C(8) C(5) C(6) C(10) 118.4(15) ? . . . .
C(6) C(5) C(9) C(10) -14(2) ? . . . .
C(6) C(5) C(9) C(7) 57(2) ? . . . 9_666
C(6) C(5) C(9) C(8) 108(2) ? . . . 9_666
C(9) C(5) C(6) C(2) 125.3(13) ? . . . .
C(9) C(5) C(6) C(3) 121.8(15) ? . . . .
C(9) C(5) C(6) C(7) -114.5(14) ? . . . .
C(9) C(5) C(6) C(8) -111.1(15) ? . . . .
C(9) C(5) C(6) C(10) 7.4(13) ? . . . .
C(6) C(5) C(10) C(9) 164(3) ? . . . .
C(6) C(5) C(10) C(7) 98(2) ? . . . 9_666
C(6) C(5) C(10) C(8) 128.8(18) ? . . . 9_666
C(10) C(5) C(6) C(2) 118.0(12) ? . . . .
C(10) C(5) C(6) C(3) 114.4(16) ? . . . .
C(10) C(5) C(6) C(7) -121.8(13) ? . . . .
C(10) C(5) C(6) C(8) -118.4(15) ? . . . .
C(10) C(5) C(6) C(9) -7.4(13) ? . . . .
C(7) C(5) C(8) C(6) -175(2) ? . . . .
C(7) C(5) C(8) C(9) 54.1(19) ? . . . 9_666
C(7) C(5) C(8) C(10) 39.6(14) ? . . . 9_666
C(8) C(5) C(7) C(6) 4.4(19) ? . . . .
C(8) C(5) C(7) C(9) -46.6(19) ? . . . 9_666
C(8) C(5) C(7) C(10) -80(2) ? . . . 9_666
C(7) C(5) C(9) C(6) -92(2) ? . . . .
C(7) C(5) C(9) C(10) -106(2) ? . . . .
C(7) C(5) C(9) C(7) -34(2) ? . . . 9_666
C(7) C(5) C(9) C(8) 16(2) ? . . . 9_666
C(9) C(5) C(7) C(6) 87(2) ? . . . .
C(9) C(5) C(7) C(8) 82(2) ? . . . .
C(9) C(5) C(7) C(9) 36(2) ? . . . 9_666
C(9) C(5) C(7) C(10) 2(3) ? . . . 9_666
C(7) C(5) C(10) C(6) -76(2) ? . . . .
C(7) C(5) C(10) C(9) 88(2) ? . . . .
C(7) C(5) C(10) C(7) 22(2) ? . . . 9_666
C(7) C(5) C(10) C(8) 52.9(19) ? . . . 9_666
C(10) C(5) C(7) C(6) 56.8(18) ? . . . .
C(10) C(5) C(7) C(8) 52(2) ? . . . .
C(10) C(5) C(7) C(9) 6(2) ? . . . 9_666
C(10) C(5) C(7) C(10) -27(3) ? . . . 9_666
C(8) C(5) C(9) C(6) -51.9(15) ? . . . .
C(8) C(5) C(9) C(10) -66(2) ? . . . .
C(8) C(5) C(9) C(7) 6(2) ? . . . 9_666
C(8) C(5) C(9) C(8) 56(2) ? . . . 9_666
C(9) C(5) C(8) C(6) 74(2) ? . . . .
C(9) C(5) C(8) C(7) -111.7(19) ? . . . .
C(9) C(5) C(8) C(9) -58(2) ? . . . 9_666
C(9) C(5) C(8) C(10) -72.1(17) ? . . . 9_666
C(8) C(5) C(10) C(6) -46.0(15) ? . . . .
C(8) C(5) C(10) C(9) 118(2) ? . . . .
C(8) C(5) C(10) C(7) 51.9(18) ? . . . 9_666
C(8) C(5) C(10) C(8) 82.8(13) ? . . . 9_666
C(10) C(5) C(8) C(6) 49.3(17) ? . . . .
C(10) C(5) C(8) C(7) -136.1(17) ? . . . .
C(10) C(5) C(8) C(9) -82(2) ? . . . 9_666
C(10) C(5) C(8) C(10) -96.5(14) ? . . . 9_666
C(9) C(5) C(10) C(6) -164(3) ? . . . .
C(9) C(5) C(10) C(7) -66(2) ? . . . 9_666
C(9) C(5) C(10) C(8) -35(2) ? . . . 9_666
C(10) C(5) C(9) C(6) 14(2) ? . . . .
C(10) C(5) C(9) C(7) 71(2) ? . . . 9_666
C(10) C(5) C(9) C(8) 122(3) ? . . . 9_666
C(2) C(6) C(7) C(5) 54.2(16) ? . . . .
C(2) C(6) C(7) C(8) -131.3(19) ? . . . .
C(2) C(6) C(7) C(9) -169.0(13) ? . . . 9_666
C(2) C(6) C(7) C(10) 171.3(17) ? . . . 9_666
C(2) C(6) C(8) C(5) 65.6(19) ? . . . .
C(2) C(6) C(8) C(7) 61(2) ? . . . .
C(2) C(6) C(8) C(9) 132(2) ? . . . 9_666
C(2) C(6) C(8) C(10) 107(2) ? . . . 9_666
C(2) C(6) C(9) C(5) -51.8(16) ? . . . .
C(2) C(6) C(9) C(10) 111(2) ? . . . .
C(2) C(6) C(9) C(7) 177.5(14) ? . . . 9_666
C(2) C(6) C(9) C(8) -140(2) ? . . . 9_666
C(2) C(6) C(10) C(5) -63.4(17) ? . . . .
C(2) C(6) C(10) C(9) -78(2) ? . . . .
C(2) C(6) C(10) C(7) -157.1(17) ? . . . 9_666
C(2) C(6) C(10) C(8) -116.7(17) ? . . . 9_666
C(3) C(6) C(7) C(5) 69(2) ? . . . .
C(3) C(6) C(7) C(8) -116(2) ? . . . .
C(3) C(6) C(7) C(9) -154.2(17) ? . . . 9_666
C(3) C(6) C(7) C(10) -173.9(18) ? . . . 9_666
C(3) C(6) C(8) C(5) 92(2) ? . . . .
C(3) C(6) C(8) C(7) 88(2) ? . . . .
C(3) C(6) C(8) C(9) 159(2) ? . . . 9_666
C(3) C(6) C(8) C(10) 134(2) ? . . . 9_666
C(3) C(6) C(9) C(5) -73(2) ? . . . .
C(3) C(6) C(9) C(10) 90(2) ? . . . .
C(3) C(6) C(9) C(7) 156.4(18) ? . . . 9_666
C(3) C(6) C(9) C(8) -161(2) ? . . . 9_666
C(3) C(6) C(10) C(5) -88(2) ? . . . .
C(3) C(6) C(10) C(9) -103(2) ? . . . .
C(3) C(6) C(10) C(7) 178.2(19) ? . . . 9_666
C(3) C(6) C(10) C(8) -141.4(18) ? . . . 9_666
C(5) C(6) C(7) C(8) 175(2) ? . . . .
C(5) C(6) C(7) C(9) 136.8(19) ? . . . 9_666
C(5) C(6) C(7) C(10) 117(2) ? . . . 9_666
C(5) C(6) C(8) C(7) -4(2) ? . . . .
C(5) C(6) C(8) C(9) 67(3) ? . . . 9_666
C(5) C(6) C(8) C(10) 42(2) ? . . . 9_666
C(5) C(6) C(9) C(10) 163(3) ? . . . .
C(5) C(6) C(9) C(7) -130.6(19) ? . . . 9_666
C(5) C(6) C(9) C(8) -88(2) ? . . . 9_666
C(5) C(6) C(10) C(9) -15(2) ? . . . .
C(5) C(6) C(10) C(7) -94(2) ? . . . 9_666
C(5) C(6) C(10) C(8) -53.2(19) ? . . . 9_666
C(7) C(6) C(8) C(5) 4(2) ? . . . .
C(7) C(6) C(8) C(9) 71(2) ? . . . 9_666
C(7) C(6) C(8) C(10) 46.2(17) ? . . . 9_666
C(8) C(6) C(7) C(5) -175(2) ? . . . .
C(8) C(6) C(7) C(9) -37.7(17) ? . . . 9_666
C(8) C(6) C(7) C(10) -57(2) ? . . . 9_666
C(7) C(6) C(9) C(5) 48.2(15) ? . . . .
C(7) C(6) C(9) C(10) -148(2) ? . . . .
C(7) C(6) C(9) C(7) -82.4(14) ? . . . 9_666
C(7) C(6) C(9) C(8) -40(2) ? . . . 9_666
C(9) C(6) C(7) C(5) -52.4(16) ? . . . .
C(9) C(6) C(7) C(8) 122.1(19) ? . . . .
C(9) C(6) C(7) C(9) 84.4(15) ? . . . 9_666
C(9) C(6) C(7) C(10) 65(2) ? . . . 9_666
C(7) C(6) C(10) C(5) 49.1(15) ? . . . .
C(7) C(6) C(10) C(9) 35(2) ? . . . .
C(7) C(6) C(10) C(7) -45(2) ? . . . 9_666
C(7) C(6) C(10) C(8) -4(2) ? . . . 9_666
C(10) C(6) C(7) C(5) -67(2) ? . . . .
C(10) C(6) C(7) C(8) 107(2) ? . . . .
C(10) C(6) C(7) C(9) 69.8(19) ? . . . 9_666
C(10) C(6) C(7) C(10) 50(2) ? . . . 9_666
C(8) C(6) C(9) C(5) 82(2) ? . . . .
C(8) C(6) C(9) C(10) -115(2) ? . . . .
C(8) C(6) C(9) C(7) -49(2) ? . . . 9_666
C(8) C(6) C(9) C(8) -6(2) ? . . . 9_666
C(9) C(6) C(8) C(5) -59.7(17) ? . . . .
C(9) C(6) C(8) C(7) -64(2) ? . . . .
C(9) C(6) C(8) C(9) 7(3) ? . . . 9_666
C(9) C(6) C(8) C(10) -18(2) ? . . . 9_666
C(8) C(6) C(10) C(5) 91(2) ? . . . .
C(8) C(6) C(10) C(9) 77(3) ? . . . .
C(8) C(6) C(10) C(7) -2(3) ? . . . 9_666
C(8) C(6) C(10) C(8) 38(2) ? . . . 9_666
C(10) C(6) C(8) C(5) -87(2) ? . . . .
C(10) C(6) C(8) C(7) -92(2) ? . . . .
C(10) C(6) C(8) C(9) -20(4) ? . . . 9_666
C(10) C(6) C(8) C(10) -45(3) ? . . . 9_666
C(9) C(6) C(10) C(5) 15(2) ? . . . .
C(9) C(6) C(10) C(7) -79(2) ? . . . 9_666
C(9) C(6) C(10) C(8) -39(2) ? . . . 9_666
C(10) C(6) C(9) C(5) -163(3) ? . . . .
C(10) C(6) C(9) C(7) 66(2) ? . . . 9_666
C(10) C(6) C(9) C(8) 109(3) ? . . . 9_666
C(5) C(7) C(8) C(6) 2.9(12) ? . . . .
C(5) C(7) C(8) C(9) -130.5(14) ? . . . 9_666
C(5) C(7) C(8) C(10) -130.0(14) ? . . . 9_666
C(5) C(7) C(9) C(5) -36(2) ? . . 9_666 9_666
C(5) C(7) C(9) C(6) -64(2) ? . . 9_666 9_666
C(5) C(7) C(9) C(10) -119(2) ? . . 9_666 9_666
C(5) C(7) C(9) C(8) 60(2) ? . . 9_666 .
C(5) C(7) C(10) C(5) 25(3) ? . . 9_666 9_666
C(5) C(7) C(10) C(6) -11(3) ? . . 9_666 9_666
C(5) C(7) C(10) C(9) 80(3) ? . . 9_666 9_666
C(5) C(7) C(10) C(8) 79(2) ? . . 9_666 .
C(6) C(7) C(8) C(5) -2.9(12) ? . . . .
C(6) C(7) C(8) C(9) -133.4(16) ? . . . 9_666
C(6) C(7) C(8) C(10) -132.8(14) ? . . . 9_666
C(6) C(7) C(9) C(5) -60(2) ? . . 9_666 9_666
C(6) C(7) C(9) C(6) -88.5(14) ? . . 9_666 9_666
C(6) C(7) C(9) C(10) -143(2) ? . . 9_666 9_666
C(6) C(7) C(9) C(8) 36.0(14) ? . . 9_666 .
C(6) C(7) C(10) C(5) -12(2) ? . . 9_666 9_666
C(6) C(7) C(10) C(6) -48(2) ? . . 9_666 9_666
C(6) C(7) C(10) C(9) 44(2) ? . . 9_666 9_666
C(6) C(7) C(10) C(8) 42.7(16) ? . . 9_666 .
C(8) C(7) C(9) C(5) -96(2) ? . . 9_666 9_666
C(8) C(7) C(9) C(6) -124.5(17) ? . . 9_666 9_666
C(8) C(7) C(9) C(10) -179(2) ? . . 9_666 9_666
C(9) C(7) C(8) C(5) 130.5(14) ? 9_666 . . .
C(9) C(7) C(8) C(6) 133.4(16) ? 9_666 . . .
C(9) C(7) C(8) C(10) 0.6(10) ? 9_666 . . 9_666
C(8) C(7) C(10) C(5) -54.4(18) ? . . 9_666 9_666
C(8) C(7) C(10) C(6) -91(2) ? . . 9_666 9_666
C(8) C(7) C(10) C(9) 0.9(18) ? . . 9_666 9_666
C(10) C(7) C(8) C(5) 130.0(14) ? 9_666 . . .
C(10) C(7) C(8) C(6) 132.8(14) ? 9_666 . . .
C(10) C(7) C(8) C(9) -0.6(10) ? 9_666 . . 9_666
C(9) C(7) C(10) C(5) -55(2) ? 9_666 . 9_666 9_666
C(9) C(7) C(10) C(6) -92(2) ? 9_666 . 9_666 9_666
C(9) C(7) C(10) C(8) -0.9(18) ? 9_666 . 9_666 .
C(10) C(7) C(9) C(5) 83(2) ? 9_666 . 9_666 9_666
C(10) C(7) C(9) C(6) 54(2) ? 9_666 . 9_666 9_666
C(10) C(7) C(9) C(8) 179(2) ? 9_666 . 9_666 .
C(5) C(8) C(9) C(5) 62(2) ? . . 9_666 9_666
C(5) C(8) C(9) C(6) 25(2) ? . . 9_666 9_666
C(5) C(8) C(9) C(10) -43(3) ? . . 9_666 9_666
C(5) C(8) C(9) C(7) -43.8(15) ? . . 9_666 .
C(5) C(8) C(10) C(5) 88.5(13) ? . . 9_666 9_666
C(5) C(8) C(10) C(6) 61.2(18) ? . . 9_666 9_666
C(5) C(8) C(10) C(9) 141(3) ? . . 9_666 9_666
C(5) C(8) C(10) C(7) -40.1(13) ? . . 9_666 .
C(6) C(8) C(9) C(5) 30(3) ? . . 9_666 9_666
C(6) C(8) C(9) C(6) -7(3) ? . . 9_666 9_666
C(6) C(8) C(9) C(10) -75(3) ? . . 9_666 9_666
C(6) C(8) C(9) C(7) -76(2) ? . . 9_666 .
C(6) C(8) C(10) C(5) 68(2) ? . . 9_666 9_666
C(6) C(8) C(10) C(6) 40(2) ? . . 9_666 9_666
C(6) C(8) C(10) C(9) 121(3) ? . . 9_666 9_666
C(6) C(8) C(10) C(7) -61(2) ? . . 9_666 .
C(7) C(8) C(9) C(5) 106(2) ? . . 9_666 9_666
C(7) C(8) C(9) C(6) 69(2) ? . . 9_666 9_666
C(7) C(8) C(9) C(10) 1(2) ? . . 9_666 9_666
C(7) C(8) C(10) C(5) 128.6(16) ? . . 9_666 9_666
C(7) C(8) C(10) C(6) 101.3(19) ? . . 9_666 9_666
C(7) C(8) C(10) C(9) -179(2) ? . . 9_666 9_666
C(9) C(8) C(10) C(5) -53(2) ? 9_666 . 9_666 9_666
C(9) C(8) C(10) C(6) -80(3) ? 9_666 . 9_666 9_666
C(9) C(8) C(10) C(7) 179(2) ? 9_666 . 9_666 .
C(10) C(8) C(9) C(5) 105(3) ? 9_666 . 9_666 9_666
C(10) C(8) C(9) C(6) 67(2) ? 9_666 . 9_666 9_666
C(10) C(8) C(9) C(7) -1(2) ? 9_666 . 9_666 .
C(5) C(9) C(10) C(6) 9.3(17) ? . . . .
C(5) C(9) C(10) C(7) 117.1(14) ? . . . 9_666
C(5) C(9) C(10) C(8) 116(2) ? . . . 9_666
C(6) C(9) C(10) C(5) -9.3(17) ? . . . .
C(6) C(9) C(10) C(7) 107.9(15) ? . . . 9_666
C(6) C(9) C(10) C(8) 107(2) ? . . . 9_666
C(7) C(9) C(10) C(5) -117.1(14) ? 9_666 . . .
C(7) C(9) C(10) C(6) -107.9(15) ? 9_666 . . .
C(7) C(9) C(10) C(8) -0.9(18) ? 9_666 . . 9_666
C(8) C(9) C(10) C(5) -116(2) ? 9_666 . . .
C(8) C(9) C(10) C(6) -107(2) ? 9_666 . . .
C(8) C(9) C(10) C(7) 0.9(18) ? 9_666 . . 9_666
N(3) C(11) C(11) C(11) -42.5(10) ? . . 2_655 3_665
N(3) C(11) C(11) C(12) -134.3(19) ? . . 2_655 4_565
N(3) C(11) C(11) C(11) 42.5(9) ? . . 4_565 3_665
N(3) C(11) C(11) C(12) 132.5(18) ? . . 4_565 2_655
N(3) C(11) C(12) C(12) -43(2) ? . . 3_665 2_655
N(3) C(11) C(12) C(12) 47(2) ? . . 3_665 4_565
N(3) C(11) C(12) C(13) 3(3) ? . . 3_665 .
C(11) C(11) C(11) N(3) -42.5(9) ? 2_655 . 4_565 .
C(11) C(11) C(11) C(12) 90.0(15) ? 2_655 . 4_565 2_655
C(11) C(11) C(11) N(3) 42.5(10) ? 4_565 . 2_655 .
C(11) C(11) C(11) C(12) -91.8(16) ? 4_565 . 2_655 4_565
C(11) C(11) C(12) C(12) -88.4(17) ? 2_655 . 3_665 2_655
C(11) C(11) C(12) C(12) 1.6(18) ? 2_655 . 3_665 4_565
C(11) C(11) C(12) C(13) -43(2) ? 2_655 . 3_665 .
C(12) C(11) C(11) N(3) 132.5(19) ? 3_665 . 2_655 .
C(12) C(11) C(11) C(11) 90.0(16) ? 3_665 . 2_655 3_665
C(12) C(11) C(11) C(12) -2(2) ? 3_665 . 2_655 4_565
C(11) C(11) C(12) C(12) 1.6(16) ? 4_565 . 3_665 2_655
C(11) C(11) C(12) C(12) 91.6(17) ? 4_565 . 3_665 4_565
C(11) C(11) C(12) C(13) 47(2) ? 4_565 . 3_665 .
C(12) C(11) C(11) N(3) -134.3(18) ? 3_665 . 4_565 .
C(12) C(11) C(11) C(11) -91.8(15) ? 3_665 . 4_565 3_665
C(12) C(11) C(11) C(12) -1.8(19) ? 3_665 . 4_565 2_655
C(11) C(12) C(12) C(11) -2(2) ? 3_665 . 2_655 4_565
C(11) C(12) C(12) C(12) -89.9(17) ? 3_665 . 2_655 3_665
C(11) C(12) C(12) C(13) -132(2) ? 3_665 . 2_655 .
C(11) C(12) C(12) C(11) -1.8(18) ? 3_665 . 4_565 2_655
C(11) C(12) C(12) C(12) 88.2(16) ? 3_665 . 4_565 3_665
C(11) C(12) C(12) C(13) 130.3(18) ? 3_665 . 4_565 .
C(11) C(12) C(13) C(12) 60(2) ? 3_665 . . 2_655
C(11) C(12) C(13) C(12) -1(2) ? 3_665 . . 3_665
C(11) C(12) C(13) C(12) -63(2) ? 3_665 . . 4_565
C(11) C(12) C(13) C(14) 178.6(16) ? 3_665 . . .
C(12) C(12) C(12) C(11) -89.9(15) ? 2_655 . 4_565 2_655
C(12) C(12) C(12) C(13) 42.1(11) ? 2_655 . 4_565 .
C(12) C(12) C(12) C(11) 88.2(17) ? 4_565 . 2_655 4_565
C(12) C(12) C(12) C(13) -42.1(11) ? 4_565 . 2_655 .
C(12) C(12) C(13) C(12) -61.7(16) ? 2_655 . . 3_665
C(12) C(12) C(13) C(12) -123.4(15) ? 2_655 . . 4_565
C(12) C(12) C(13) C(14) 118.3(11) ? 2_655 . . .
C(13) C(12) C(12) C(11) 130(2) ? . . 2_655 4_565
C(13) C(12) C(12) C(12) 42.1(11) ? . . 2_655 3_665
C(12) C(12) C(13) C(12) 123.4(15) ? 4_565 . . 2_655
C(12) C(12) C(13) C(12) 61.7(16) ? 4_565 . . 3_665
C(12) C(12) C(13) C(14) -118.3(11) ? 4_565 . . .
C(13) C(12) C(12) C(11) -132.1(18) ? . . 4_565 2_655
C(13) C(12) C(12) C(12) -42.1(11) ? . . 4_565 3_665
C(12) C(13) C(14) C(15) 72.7(17) ? . . . .
C(12) C(13) C(14) C(15) -17.3(16) ? . . . 2_655
C(12) C(13) C(14) C(15) -107.3(17) ? . . . 3_665
C(12) C(13) C(14) C(15) 162.7(16) ? . . . 4_565
C(12) C(13) C(14) C(15) 162.7(17) ? 2_655 . . .
C(12) C(13) C(14) C(15) 72.7(16) ? 2_655 . . 2_655
C(12) C(13) C(14) C(15) -17.3(17) ? 2_655 . . 3_665
C(12) C(13) C(14) C(15) -107.3(15) ? 2_655 . . 4_565
C(12) C(13) C(14) C(15) -107.3(16) ? 3_665 . . .
C(12) C(13) C(14) C(15) 162.7(15) ? 3_665 . . 2_655
C(12) C(13) C(14) C(15) 72.7(17) ? 3_665 . . 3_665
C(12) C(13) C(14) C(15) -17.3(15) ? 3_665 . . 4_565
C(12) C(13) C(14) C(15) -17.3(17) ? 4_565 . . .
C(12) C(13) C(14) C(15) -107.3(16) ? 4_565 . . 2_655
C(12) C(13) C(14) C(15) 162.7(17) ? 4_565 . . 3_665
C(12) C(13) C(14) C(15) 72.7(15) ? 4_565 . . 4_565
C(13) C(14) C(15) C(15) -119.2(10) ? . . . 2_655
C(13) C(14) C(15) C(15) 119.2(10) ? . . . 4_565
C(13) C(14) C(15) C(16) 177.4(16) ? . . . 8_664
C(13) C(14) C(15) C(15) 119.2(10) ? . . 2_655 .
C(13) C(14) C(15) C(15) 119.2(10) ? . . 3_665 2_655
C(13) C(14) C(15) C(15) -119.2(10) ? . . 3_665 4_565
C(13) C(14) C(15) C(15) -119.2(10) ? . . 4_565 .
C(15) C(14) C(15) C(15) -121.7(14) ? 2_655 . . 4_565
C(15) C(14) C(15) C(16) -63(2) ? 2_655 . . 8_664
C(15) C(14) C(15) C(15) -60.8(15) ? . . 3_665 2_655
C(15) C(14) C(15) C(15) 60.8(14) ? . . 3_665 4_565
C(15) C(14) C(15) C(15) 60.8(14) ? 3_665 . . 2_655
C(15) C(14) C(15) C(15) -60.8(15) ? 3_665 . . 4_565
C(15) C(14) C(15) C(16) -3(2) ? 3_665 . . 8_664
C(15) C(14) C(15) C(15) 121.7(14) ? 4_565 . . 2_655
C(15) C(14) C(15) C(16) 58(2) ? 4_565 . . 8_664
C(15) C(14) C(15) C(15) 121.7(14) ? 2_655 . 3_665 4_565
C(15) C(14) C(15) C(15) -121.7(14) ? 3_665 . 2_655 .
C(15) C(14) C(15) C(15) 60.8(14) ? 2_655 . 4_565 .
C(15) C(14) C(15) C(15) -60.8(13) ? 4_565 . 2_655 .
C(15) C(14) C(15) C(15) 121.7(14) ? 3_665 . 4_565 .
C(15) C(14) C(15) C(15) -121.7(14) ? 4_565 . 3_665 2_655
C(15) C(15) C(15) C(14) -43.6(10) ? 2_655 . 4_565 .
C(15) C(15) C(15) C(14) 43.6(10) ? 4_565 . 2_655 .
C(16) C(15) C(15) C(14) 129.8(18) ? 8_664 . 2_655 .
C(16) C(15) C(15) C(14) -133.0(19) ? 8_664 . 4_565 .
C(15) C(16) C(16) N(4) -132(2) ? 8_665 . 2_655 .
C(15) C(16) C(16) N(4) 135.1(19) ? 8_665 . 4_565 .
C(16) C(16) C(16) N(4) 41.3(12) ? 2_655 . 4_565 .
C(16) C(16) C(16) N(4) -41.3(13) ? 4_565 . 2_655 .
N(5) C(17) C(18) C(19) 1.4(14) ? . . . .
C(17) C(18) C(19) C(18) -0.6(9) ? . . . 3_655
C(17) C(18) C(19) C(19) 179.4(6) ? . . . 14_665
C(18) C(19) C(19) C(18) -154.2(7) ? . . 14_665 14_665
C(18) C(19) C(19) C(18) 25.8(7) ? 3_655 . 14_665 14_665

loop_
_geom_contact_atom_site_label_1
_geom_contact_atom_site_label_2
_geom_contact_distance
_geom_contact_publ_flag
_geom_contact_site_symmetry_1
_geom_contact_site_symmetry_2
N(3) C(12) 2.37(2) ? . .
N(3) C(12) 2.37(2) ? . 2_655
N(3) C(12) 2.37(2) ? . 3_665
N(3) C(12) 2.37(2) ? . 4_565
N(3) C(13) 2.811(18) ? . .
N(4) C(14) 2.809(19) ? . 5_655
N(4) C(15) 2.34(2) ? . 5_655
N(4) C(15) 2.34(2) ? . 6_555
N(4) C(15) 2.337(19) ? . 7_565
N(4) C(15) 2.34(2) ? . 8_665
C(11) C(12) 2.62(3) ? . .
C(11) C(12) 2.11(3) ? . 2_655
C(11) C(12) 1.38(2) ? . 3_665
C(11) C(12) 2.08(2) ? . 4_565
C(11) C(13) 2.37(2) ? . .
C(12) N(3) 2.37(2) ? . .
C(12) C(11) 2.62(3) ? . .
C(12) C(11) 2.08(3) ? . 2_655
C(12) C(11) 1.38(2) ? . 3_665
C(12) C(11) 2.11(2) ? . 4_565
C(13) N(3) 2.811(18) ? . .
C(13) C(11) 2.37(2) ? . .
C(13) C(11) 2.37(2) ? . 2_655
C(13) C(11) 2.37(2) ? . 3_665
C(13) C(11) 2.37(2) ? . 4_565
C(14) N(4) 2.809(19) ? . 5_654
C(14) C(16) 2.40(2) ? . 5_654
C(14) C(16) 2.40(2) ? . 6_554
C(14) C(16) 2.40(2) ? . 7_564
C(14) C(16) 2.40(2) ? . 8_664
C(15) N(4) 2.337(19) ? . 5_654
C(15) C(16) 2.12(3) ? . 5_654
C(15) C(16) 2.62(3) ? . 6_554
C(15) C(16) 2.06(3) ? . 7_564
C(15) C(16) 1.36(2) ? . 8_664
C(16) C(14) 2.40(2) ? . 5_655
C(16) C(15) 2.12(3) ? . 5_655
C(16) C(15) 2.62(3) ? . 6_555
C(16) C(15) 2.06(3) ? . 7_565
C(16) C(15) 1.36(2) ? . 8_665
C(18) C(18) 3.015(13) ? . 16_545
C(19) C(18) 2.530(14) ? . 16_545
N(3) H(3) 3.211 ? . .
N(3) H(3) 3.211 ? . 2_655
N(3) H(3) 3.211 ? . 3_665
N(3) H(3) 3.211 ? . 4_565
N(4) H(4) 3.178 ? . 5_655
N(4) H(4) 3.178 ? . 6_555
N(4) H(4) 3.178 ? . 7_565
N(4) H(4) 3.178 ? . 8_665
C(11) H(3) 3.564 ? . .
C(11) H(3) 2.930 ? . 2_655
C(11) H(3) 2.029 ? . 3_665
C(11) H(3) 2.869 ? . 4_565
C(12) H(1) 3.565 ? . .
C(12) H(1) 2.897 ? . 2_655
C(12) H(1) 2.013 ? . 3_665
C(12) H(1) 2.893 ? . 4_565
C(13) H(1) 3.209 ? . .
C(13) H(1) 3.209 ? . 2_655
C(13) H(1) 3.209 ? . 3_665
C(13) H(1) 3.209 ? . 4_565
C(14) H(5) 3.235 ? . 5_654
C(14) H(5) 3.235 ? . 6_554
C(14) H(5) 3.235 ? . 7_564
C(14) H(5) 3.235 ? . 8_664
C(15) H(5) 2.899 ? . 5_654
C(15) H(5) 3.566 ? . 6_554
C(15) H(5) 2.875 ? . 7_564
C(15) H(5) 1.988 ? . 8_664
C(16) H(4) 2.932 ? . 5_655
C(16) H(4) 3.565 ? . 6_555
C(16) H(4) 2.864 ? . 7_565
C(16) H(4) 2.021 ? . 8_665
C(18) H(6) 2.740 ? . 16_545
C(19) H(6) 2.703 ? . 16_545
H(1) C(12) 3.565 ? . .
H(1) C(12) 2.893 ? . 2_655
H(1) C(12) 2.013 ? . 3_665
H(1) C(12) 2.897 ? . 4_565
H(1) C(13) 3.209 ? . .
H(1) H(3) 3.594 ? . 2_655
H(1) H(3) 2.301 ? . 3_665
H(1) H(3) 3.570 ? . 4_565
H(3) N(3) 3.211 ? . .
H(3) C(11) 3.564 ? . .
H(3) C(11) 2.869 ? . 2_655
H(3) C(11) 2.029 ? . 3_665
H(3) C(11) 2.930 ? . 4_565
H(3) H(1) 3.570 ? . 2_655
H(3) H(1) 2.301 ? . 3_665
H(3) H(1) 3.594 ? . 4_565
H(4) N(4) 3.178 ? . 5_654
H(4) C(16) 2.932 ? . 5_654
H(4) C(16) 3.565 ? . 6_554
H(4) C(16) 2.864 ? . 7_564
H(4) C(16) 2.021 ? . 8_664
H(4) H(5) 3.591 ? . 5_654
H(4) H(5) 3.566 ? . 7_564
H(4) H(5) 2.287 ? . 8_664
H(5) C(14) 3.235 ? . 5_655
H(5) C(15) 2.899 ? . 5_655
H(5) C(15) 3.566 ? . 6_555
H(5) C(15) 2.875 ? . 7_565
H(5) C(15) 1.988 ? . 8_665
H(5) H(4) 3.591 ? . 5_655
H(5) H(4) 3.566 ? . 7_565
H(5) H(4) 2.287 ? . 8_665
H(6) C(18) 2.740 ? . 16_545
H(6) H(6) 2.254 ? . 16_545


#==============================================================================

# Additional structures and associated data_? identifiers
# should be added at this point if there is more than one 
# structure analysis in the CIF.

#==============================================================================

#     End of CIF

#==============================================================================
